# Supplementary material for: Health risk communication and infodemic management in Iran: development and validation of a conceptual framework
Source: PubMed Central journal article supplement (PMC10387647; doi:10.1136/bmjopen-2023-072326), 2023-07-30
Supplement: bmjopen-2023-072326.draft_revisions.pdf [file bmjopen-2023-072326.draft_revisions.pdf]

# BMJ Open

BMJ Open is committed to open peer review. As part of this commitment we make the peer review history of every article we publish publicly available.

When an article is published we post the peer reviewers' comments and the authors' responses online. We also post the versions of the paper that were used during peer review. These are the versions that the peer review comments apply to.

The versions of the paper that follow are the versions that were submitted during the peer review process. They are not the versions of record or the final published versions. They should not be cited or distributed as the published version of this manuscript.

BMJ Open is an open access journal and the full, final, typeset and author-corrected version of record of the manuscript is available on our site with no access controls, subscription charges or pay-per-view fees (<http://bmjopen.bmj.com>).

If you have any questions on BMJ Open's open peer review process please email [info.bmjopen@bmj.com](mailto:info.bmjopen@bmj.com)

# BMJ Open

## Health risk communication and infodemic management in Iran: Development and validation of a conceptual framework

|                               |                                                                                                                                                                                                                                                                                                                                                                                                                                                                                                                                                                                                                                                                                                                                                                                                                                                                                                                                                                                                                                                                                                                                                                                                                                                             |
|-------------------------------|-------------------------------------------------------------------------------------------------------------------------------------------------------------------------------------------------------------------------------------------------------------------------------------------------------------------------------------------------------------------------------------------------------------------------------------------------------------------------------------------------------------------------------------------------------------------------------------------------------------------------------------------------------------------------------------------------------------------------------------------------------------------------------------------------------------------------------------------------------------------------------------------------------------------------------------------------------------------------------------------------------------------------------------------------------------------------------------------------------------------------------------------------------------------------------------------------------------------------------------------------------------|
| Journal:                      | <i>BMJ Open</i>                                                                                                                                                                                                                                                                                                                                                                                                                                                                                                                                                                                                                                                                                                                                                                                                                                                                                                                                                                                                                                                                                                                                                                                                                                             |
| Manuscript ID                 | bmjopen-2023-072326                                                                                                                                                                                                                                                                                                                                                                                                                                                                                                                                                                                                                                                                                                                                                                                                                                                                                                                                                                                                                                                                                                                                                                                                                                         |
| Article Type:                 | Original research                                                                                                                                                                                                                                                                                                                                                                                                                                                                                                                                                                                                                                                                                                                                                                                                                                                                                                                                                                                                                                                                                                                                                                                                                                           |
| Date Submitted by the Author: | 01-Feb-2023                                                                                                                                                                                                                                                                                                                                                                                                                                                                                                                                                                                                                                                                                                                                                                                                                                                                                                                                                                                                                                                                                                                                                                                                                                                 |
| Complete List of Authors:     | <p>Bazrafshan, Azam; Kerman University of Medical Sciences, HIV/STI Surveillance Research Center, and WHO Collaborative Center for HIV Surveillance</p> <p>Sadeghi, Azadeh; Kerman University of Medical Sciences, HIV/STI Surveillance Research Center, and WHO Collaborative Center for HIV Surveillance; Kerman University of Medical Sciences, Deputy of Health, Department of Communicable Diseases</p> <p>Bazrafshan, Maliheh Sadat; Kerman University of Medical Sciences, HIV/STI Surveillance Research Center, and WHO Collaborative Center for HIV Surveillance</p> <p>Mirzaie, Hossein; Kerman University of Medical Sciences, HIV/STI Surveillance Research Center, and WHO Collaborative Center for HIV Surveillance</p> <p>Shafiee, Mehdi; Kerman University of Medical Sciences, HIV/STI Surveillance Research Center, and WHO Collaborative Center for HIV Surveillance; Kerman University of Medical Sciences, Deputy of Health, Department of Communicable Diseases</p> <p>Geerts, Jaason; Canadian College of Health Leaders; City University of London, Bayes Business School</p> <p>Sharifi, Hamid; Kerman University of Medical Sciences, HIV/STI Surveillance Research Center, and WHO Collaborating Center for HIV Surveillance</p> |
| Keywords:                     | COVID-19, Health policy < HEALTH SERVICES ADMINISTRATION & MANAGEMENT, INFECTIOUS DISEASES                                                                                                                                                                                                                                                                                                                                                                                                                                                                                                                                                                                                                                                                                                                                                                                                                                                                                                                                                                                                                                                                                                                                                                  |
|                               |                                                                                                                                                                                                                                                                                                                                                                                                                                                                                                                                                                                                                                                                                                                                                                                                                                                                                                                                                                                                                                                                                                                                                                                                                                                             |

SCHOLARONE™  
Manuscripts

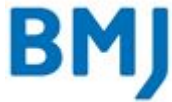

I, the Submitting Author has the right to grant and does grant on behalf of all authors of the Work (as defined in the below author licence), an exclusive licence and/or a non-exclusive licence for contributions from authors who are: i) UK Crown employees; ii) where BMJ has agreed a CC-BY licence shall apply, and/or iii) in accordance with the terms applicable for US Federal Government officers or employees acting as part of their official duties; on a worldwide, perpetual, irrevocable, royalty-free basis to BMJ Publishing Group Ltd ("BMJ") its licensees and where the relevant Journal is co-owned by BMJ to the co-owners of the Journal, to publish the Work in this journal and any other BMJ products and to exploit all rights, as set out in our [licence](#).

The Submitting Author accepts and understands that any supply made under these terms is made by BMJ to the Submitting Author unless you are acting as an employee on behalf of your employer or a postgraduate student of an affiliated institution which is paying any applicable article publishing charge ("APC") for Open Access articles. Where the Submitting Author wishes to make the Work available on an Open Access basis (and intends to pay the relevant APC), the terms of reuse of such Open Access shall be governed by a Creative Commons licence – details of these licences and which [Creative Commons](#) licence will apply to this Work are set out in our licence referred to above.

Other than as permitted in any relevant BMJ Author's Self Archiving Policies, I confirm this Work has not been accepted for publication elsewhere, is not being considered for publication elsewhere and does not duplicate material already published. I confirm all authors consent to publication of this Work and authorise the granting of this licence.

## Health risk communication and infodemic management in Iran: Development and validation of a conceptual framework

**Authors:** Azam Bazrafshan<sup>1</sup>, Azadeh Sadeghi<sup>1,2</sup>, Maliheh Sadat Bazrafshan<sup>1</sup>, Hossein Mirzaie<sup>1</sup>, Mehdi Shafiee<sup>1,2</sup>, Jaason M. Geerts<sup>3,4</sup>, Hamid Sharifi<sup>1\*</sup>

1 HIV/STI Surveillance Research Center, and WHO Collaborative Center for HIV Surveillance, Kerman University of Medical Sciences

2 Department of Communicable Diseases, Deputy of Health, Kerman University of Medical Sciences, Kerman, Iran

3 Honorary Visiting Fellow, Bayes Business School, City, University of London, UK.

4 Director of Research and Leadership Development, The Canadian College of Health Leaders, Ottawa, Canada.

\*Corresponding author: Hamid Sharifi (Sharifihami@gmail.com)

### Abstract

**Objective:** The COVID-19 pandemic has demonstrated the current gaps in Iran's and other health systems' risk communication. The COVID-19 infodemic has undermined policy responses and amplified distrust and concerns among the Iranian population. This study aims to develop a conceptual framework for health risk communication and infodemic management (RCIM) during epidemics and health emergencies in Iran that could have applications in other contexts.

**Design:** this study was designed in two phases. Phase 1 involved semi-structured qualitative interviews to explore RCIM strategies and programs across public health settings in Iran and develop a conceptual framework. Subsequently, an online expert panel was arranged to evaluate the trustworthiness and credibility of the proposed framework.

**Setting:** provincial/national public health settings.

**Participants:** 20 key informants from provincial and national public health authorities who contributed to COVID-19 response programs and participated in interviews. Nine experts from diverse academic disciplines, provincial and national settings, and geography who participated in an online expert panel.

**Results:** the conceptual model adapted from the qualitative interviews and expert panel discussions and was characterized by using the World Health Organization (WHO) health system framework, including leadership and governance, information, health workforce, financial resources, media, and community. Leadership and governance was recognized as the first unique component for developing RCIM in Iran. Developing information infrastructures including high quality surveillance system, training quality health workforce, financial resources, communication channels and community engagement were recognized as other dimensions for developing health risk communication in Iran.

**Conclusion:** the proposed framework was a step toward establishing a national health risk communication in Iran but more needs to be done to bridge the gap between research, policy and practice. Further investigations are recommended to assess the validity or usefulness of the conceptual framework. This model has the potential to be applied in other contexts or to serve as the foundation for a locally-created equivalent.

**Keywords:** risk communication, leadership, infodemic, COVID-19, preparedness, Iran

### **'Strengths and limitations of this study'**

- This study represents field experiences of public health professionals across provincial/national settings in risk communication and infodemic management (RCIM) during the COVID-19 pandemic in Iran.
- Inspecting experiences and perceptions of academics, health professionals and policy-makers ensures validity of the results by approaching the RCIM topic from different perspectives, and establish credibility of the proposed framework by giving an overarching landscape of RCIM across provincial/national public health settings.
- This study validated an overarching conceptual framework with expert panel discussions for establishing a risk communication and infodemic management system during epidemics and health emergencies in Iran.

### **Introduction**

The COVID-19 pandemic has impacted many aspects of population life globally and has led to serious consequences in health, economic, social, cultural, and informational fields (1). Among the social implications of the COVID-19 pandemic, the constant releases of immediate and extensive health or other misinformation by non-expert sources, from anonymous social media posts to non-stringently reviewed rapid academic publications, contributed significantly to misguided health policies and a host of deleterious public consequences (2, 3). This phenomenon is called infodemic. According to the World Health Organization (WHO) definition, an infodemic refers to the distribution of false or misleading information in digital and physical environments during a disease outbreak (4). Infodemic makes populations more vulnerable to disease infection, their side effects, and other related harms (5).

Information overload during the COVID-19 pandemic represents a parallel pandemic whose transmission rate is much faster than the disease itself, since the rampant prejudicial and erroneous information can trigger wild and accelerated waves of fear to spread in the general population (6). Before the advent of the Internet, one of the main reasons for deaths during epidemics was the lack of sufficient information on the prevention, care, and treatment of the disease (7). But now, social and electronic media and instant messaging are the primary sources of misinformation during epidemics and health emergencies, which can have a heightened impact, particularly when people are in lockdown or isolation (8).

The infodemic may severely change the pandemic's course by interfering with population adherence to public health interventions such as wearing masks, social distancing, and vaccination. In particular, the impact of the infodemic on vaccination is critical because it is key to reverting to pre-pandemic normalcy. The risk and experience of infodemic for economically disadvantaged countries has been reported to be higher than in developed and richer countries due to a range of inequalities. Lower rates of health literacy, access to reliable health information, and public trust in public health authorities (9) can make people from underdeveloped and developing countries more susceptible to believing fake news and misinformation upon exposure (10, 11). This is compounded by existing inequalities in terms of comparatively limited healthcare infrastructure and reduced access to healthcare facilities and public health professionals, make people from these countries more prone to sporadic and ill-advised health behaviors (12). In this context, the spread of health mis-information as part of the infodemic can pose higher distress to populations in underdeveloped and developing countries during epidemics and health emergencies (13), negatively influence public risk perceptions (14-16), and undermine policy and response, increase the spread and burden of the pandemic, and widen global health disparities.

1  
2  
3 The infodemic impacts citizens in every country and addressing it is a new and centrally important  
4 challenge in managing and responding to the COVID-19 pandemic—and will be so for future epidemics  
5 and health emergencies. To understand and counter the rapidly changing nature of the COVID-19  
6 infodemic and develop effective strategies to mitigate its negative effects such as the further spread of  
7 misinformation, a number of novel strategies and initiatives have been established across global public  
8 health settings. The WHO has been realised as a pioneer in developing guidelines and initiatives to  
9 combat misinformation and infodemic management across the world(17). From early in the COVID-19  
10 response, the WHO began to develop international strategies for infodemic management across the  
11 countries. These strategies were developed in cooperation with other organisations, including US  
12 Centers for Disease Control and Prevention (CDC) and the Africa Centre for Disease Control and  
13 Prevention. To track and address rumours and misinformation surrounding COVID-19 and HIV, UNAIDS  
14 and Africa CDC have been running a rumour management system—software that uses machine learning  
15 combined with human expertise to collect and analyse rumour data from open-source traditional media  
16 (web-based, broadcast), as well as social media (Facebook, Twitter, WhatsApp). The system enables the  
17 identification of false and misleading narratives and sentiments related to COVID-19 and HIV(17). In  
18 addition, a framework for infodemic management was developed through crowd-sourcing and online  
19 consultation with a wide range of global public health professionals(18). Ghana Health Services (GHS)  
20 together with the United Nations International Children's Emergency Fund (UNICEF) Country Office have  
21 developed a systematic process that effectively identifies, analyses, and responds to COVID-19 and  
22 vaccine-related misinformation in Ghana(19).

23 Risk communication and infodemic management (RCIM) are the core of risk management in epidemics  
24 and health emergencies(20). Meanwhile, information monitoring, building e-health literacy and science  
25 literacy capacity, encouraging knowledge refinement and quality improvement processes such as fact-  
26 checking and accelerating the academic peer-review process to ensure accurate and timely knowledge  
27 translation, and minimizing distorting factors such as political or commercial issues are the main pillars  
28 of the infodemic management (21). Combating mis- or disinformation online for populations is as critical  
29 as ensuring much-needed medical equipment and supplies for health workers are readily available (22).  
30 However, in underdeveloped and developing countries, with their existing health information  
31 inequalities and public health vulnerabilities, innovative RCIM approaches are needed for combating the  
32 infodemic and reducing its effect on population health conditions. In this regard, participatory  
33 engagement, and stricter regulations are necessary (23). While some contexts may be more susceptible  
34 to the dangerous potential impacts of mis- and dis-information, none is immune and the consequences  
35 of failing to combat it strategically and head-on can be dire.

36 In this study, we aimed to build on and extend previous conceptualisations of capacity building and  
37 strengthening relevant to RCIM by describing an overarching conceptual framework of RCIM in Iran by  
38 using the World Health Organization (WHO) health system framework. The RCIM field comprises  
39 multiple and diverse actors such as researchers, educators, advocates, practitioners, funders and  
40 policymakers. We, therefore, hope that this paper will be of interest and relevance to all these groups,  
41 with multiple lessons also potentially being transferable to building similar capacities in other  
42 underdeveloped and developing countries.

## 56 **Methods**

57 This sequential mixed-method exploratory study was conducted in two phases. Phase 1 involved semi-  
58 structured interviews with key informants from provincial and national public health authorities to  
59  
60

informasetof RCIM components across provincial/ national settings. Phase 2 involvedan onlinepanel of experts from relevant scientific domains to consult and evaluate the conceptual framework's validity, credibility, and transformability. This study followed Standards for reporting qualitative research (SRQR) checklist.

### **Phase 1: semi-structured interviews**

This phase involvedsemi-structured interviews with a purposive sample of 20 Iranian public health professionals across provincial and national health authorities.Study participants included leaders from community health sectors, epidemiology, public health, social medicine, health communication, and sociology disciplines. This phase included a wide range of stakeholders, academics, decision-makers, and leaders from the community and national public health settings whomet the inclusion criteria. Participants were from eight pre-specified provinces:Kerman, Tehran, Fars, Isfahan, Mazandaran, West-Azerbaijan, and Sistanva Baloochestan. Inclusion criteria were 1) having at least one year of experience in either COVID-19 prevention and control programs or decision-making in provincial or national public health settings, and 2) willingness to participate in the study.

An interview guide was developed according to previous studies (Appendix 1). The interview guide focused on the processes, infrastructures,challenges encountered, and best practices relevant to RCIM during the COVID-19 pandemic in Iran. The interview guide was primarily assessed by two expert reviewers. It was subsequently pre-tested with three target population members before the implementation.

The interviews followed a semi-structured design. However, the order of the questions and answers varied according to the participant's responses. The objectives and the activities that were involved in the study were explained to the participants. The principalinvestigator's contact details were provided, and participants' confidentiality was guaranteed. Written consent was sought before the interview, and the participants were asked to email the completed form to the principal investigator (Appendix 2). An experienced interviewer with a background in qualitative research and interviewing expertise conducted the interviews in the Farsi language. Due to COVID-19 social distancing, all interviews were conducted by telephone, audio-recorded, and transcribed verbatim. Interviews ranged between 20–55 minutes (mean = 34 minutes).Interviews were continueduntil the researchers realised they have reached content saturation.

Braun and Clarke's framework for content analysis was appliedto qualitative analysis. MAXQDA 12 (VERBI GmbH, USA) was used for manual coding and content analysis. According to the qualitative interviews and extracted themes, a preliminary list of the RCIM model's components was created. This list comprised 33componentsand was divided into sixpillars (building blocks). The list served as a basis for the conceptual model, which was then discussed with the expert panelin Phase 2.

### **Phase 2: an expert panel and nominal group technique**

In the secondphase, a group of nine participants was purposively selected to verify and prioritise key components of the RCIM model and to evaluate the credibility and transformability of the proposed conceptual model. The panel included a diverse set of stakeholders, academics, decision-makers, and leaders from the community and national public health settings. The inclusion criteria for this phase were 1) having at least three years of professional experience or established research expertise in the fields of public health, epidemiology, crisis management, infodemiology, social media studies, and health communication; and 2) willingness to participate in the study. Potential panel members (n = 9)



were identified through their academic/consulting/leadership roles in health risk communication or risk management activities across provincial or national health authorities during the COVID-19 pandemic. The expert panel members were primarily approached by email with a short statement of the purpose of the meeting. The conceptual model created following the qualitative interviews was subsequently discussed in the expert panel to evaluate its completeness and trustworthiness in terms of adequately representing essential components of an RCIM model for the country. Validating the original model with experts was also intended to augment its quality, reliability, and validity (24, 25).

Following this phase, several modifications were added to the original conceptual model, but no factor was excluded. The requisite consensus level for this phase was determined as at least 75% agreement.

### Patient and Public Involvement statement

No patient or community member was involved in this study.

## Results

### Phase 1: semi-structured interviews

#### Participants

Most participants were 51-60 years-old (n=11, 55%) and men (n=19, 95%). Most participants were from medical and public health disciplines (n=17, 85%) with a history of working as a provincial or national health officer (n=14, 70%). Participants were mostly from Tehran (n=7, 35%) and Kerman provinces (n=5, 25%) (Table 1).

Table 1 Demographic characteristic of the participants in the interviews (Phase 1) to inform the development of a conceptual framework for health risk communication and infodemic management in Iran

| Demographic characteristics                | Frequency (%) |
|--------------------------------------------|---------------|
| <b>Residence at the time of interviews</b> |               |
| Tehran                                     | 7 (35)        |
| Kerman                                     | 5 (25)        |
| Fars                                       | 2 (10)        |
| Isfahan                                    | 2 (10)        |
| Mazandaran                                 | 1 (5)         |
| West Azerbaijan                            | 1 (5)         |
| SistanvaBaluchestan                        | 1 (5)         |
| Kermanshah                                 | 1 (5)         |
| <b>Age</b>                                 |               |
| 40-49                                      | 6 (30)        |
| 50-59                                      | 11 (55)       |
| 60>                                        | 3 (15)        |
| <b>Gender</b>                              |               |
| Men                                        | 19 (95)       |
| Women                                      | 1 (5)         |
| <b>Academic Discipline</b>                 |               |
| General medicine                           | 4 (20)        |



|                              |        |
|------------------------------|--------|
| Epidemiology                 | 6 (30) |
| Social medicine              | 2 (10) |
| Health education & promotion | 1 (5)  |
| Health policy                | 2 (10) |
| Sociology                    | 3 (15) |
| Infectious disease           | 2 (10) |

The analysis of the qualitative data collected during the key informant interviews revealed 948 open codes and 84 sub-themes. Sub-themes were subsequently classified into 33 components (Appendix 3). The next step involved organising these components according to the six Iranian health system's pillars: leadership and governance, information, health workforce, financial resources, media, and community, which formed the initial RCIM conceptual model.

#### Theme 1: Leadership and Governance

The pandemic has highlighted that effective leadership and transparent decision-making and communication are essential to any successful public health strategy (25). Commensurately, all respondents mentioned leadership and governance as essential foundations. Respondents frequently emphasised transparency in decision-making and communication and accountability as important characteristics of effective leadership and governance. Lack of transparency and accountability among health officials and government authorities were among the country's substantial weaknesses in risk communication. More than half of the respondents suggested that financial and competing interests of public health officials intentionally caused the lack of transparency in information communication during the COVID-19 pandemic. The lack of transparency posed major negative consequences to public trust.

Almost all respondents emphasised that the health system needs a robust risk communication strategy and increased infodemic management capacity by developing infrastructures for monitoring, infodemiology (information epidemiology), infoveillance (26), social listening, communicating with the public, and guidance distillation based on the best available science. The purpose of building this capacity is to be able to detect outbreaks of potentially harmful misinformation, rumours, and falsehoods and to counter them with facts or other reliable information in a targeted way for each audience. One respondent emphasized that building capacity should involve designing an infodemic management system that defines national and provincial responsibilities that is based on lessons learnt from credible global guidelines, local failures, challenges, successes, and leading practices – locally and elsewhere. A multi-disciplinary and team-based approach should establish an independent rapid-response core team with clear roles and accountabilities to screen and identify community needs, concerns, and misinformation sources, rapidly respond to the potential risks, and prevent or mitigate the viral spread of misinformation across the communities.

Developing, implementing, and evaluating communication policies and strategies for potential risks were frequently mentioned by respondents. According to respondents, the lack of national and provincial policies and programs for RCIM contributed to major negative consequences to the national COVID-19 control and management efforts. Poor management of the COVID-19 infodemic, poor communication with the public and other stakeholders, and a lack of national and provincial strategies to address misinformation were major shortcomings of risk communication and infodemic management in Iran. Two respondents stated that providing people with tools for filtering, assessing and fact-checking information is essential to combat misinformation during the pandemic and health emergencies. Five

1  
2  
3 respondents believed that using a well-known and reliable communication channel and technology-  
4 based interventions would maximise the spread of valid information and impact of communication  
5 efforts and strategies.  
6

7 The general public and multi-sector involvement were emphasised for RCIM during a pandemic. Seven  
8 respondents believed that pharmaceutical companies were a major source of spreading misinformation  
9 during the pandemic. Participants believed that the financial and competing interests of public health  
10 officials deterred them from spreading of valid information about the efficacy of some new and  
11 underdeveloped medications and vaccines. As a number of health officials were among shareholders of  
12 pharmaceutical industries, they advertised some drugs or public health products and subsequently  
13 caused a fake and unrealistic demand among the population. Over half of the respondents indicated that  
14 top-down interventions with a lack of community-based approaches were among major barriers to  
15 acceptance of COVID-19 prevention and control interventions during the pandemic. Therefore, multi-  
16 sector and community involvement could reduce the potential risk of existing conflicts of interest and  
17 improve motivation to participate in information communication and management of the crisis actively.  
18 In this context, community-based approaches, such as Safiran-e-Salamat (a community-based  
19 intervention established in Tehran), and social influencers were reported as facilitators for effective risk  
20 communication and infodemic management across provincial settings.  
21

22 Lack of crowd-sourcing and ineffective use of institutional and provincial potential capacities and  
23 infrastructures during the crisis were cited by four participants as major barriers to proper COVID-19  
24 infodemic management during the pandemic. These respondents elaborated that medical universities  
25 within the provinces were isolated from the national health authorities and not supported by the  
26 Ministry of Health in planning and decision-making. Therefore, it was recommended by the respondents  
27 to establish a network capacity to share experiences, challenges, and best practices, of information  
28 communication during the potential risks.  
29

## 30 Theme 2: Information

31 Developing a network platform to systematically collect, analyse, and interpret epidemiologic data from  
32 the community and quickly disseminate the resulting information was considered an important  
33 characteristic of risk communication by the respondents. Almost all respondents emphasised that lack  
34 of access to real-time, valid, and high-quality data about the incidence, mortality, and burden of the  
35 COVID-19 disease in different provinces intensified the potential risk of misinformation among the  
36 population.  
37

38 Lack of access to high-quality surveillance data for research activities and to inform responses to  
39 potential and emergent challenges reduced transparency. It raised dramatic social concerns about the  
40 government's ability to estimate the spread of the disease or evaluate the effect of specific policies on  
41 population health. The respondents frequently reported the lack of evidence-based policies and  
42 practices as a major barrier to effective risk communication and infodemic management. In addition,  
43 the lack of substantial resources to handle the multiplication of data sources and information  
44 producers, to monitor disease trends regularly, and to appraise the quality of data sources were  
45 reported as major barriers to the effective use of surveillance data for decision-making during the  
46 pandemic.  
47

48 According to one respondent, misinterpretation of facts and available low-value data by health officials  
49 was considered as a source of misinformation during the pandemic. Some politicians, health officials,  
50 and media interpreted data according to their financial, commercial, and political interests, as well as  
51 selective reporting and misunderstanding. Therefore, developing and facilitating accurate knowledge  
52  
53  
54  
55  
56  
57  
58  
59  
60

1  
2  
3  
4  
5  
6  
7  
8  
9  
10  
11  
12  
13  
14  
15  
16  
17  
18  
19  
20  
21  
22  
23  
24  
25  
26  
27  
28  
29  
30  
31  
32  
33  
34  
35  
36  
37  
38  
39  
40  
41  
42  
43  
44  
45  
46  
47  
48  
49  
50  
51  
52  
53  
54  
55  
56  
57  
58  
59  
60

translation is required to prevent misinformation across different sectors of society. People's political, commercial, and financial interests can lead them to distort scientific messages; therefore, respondents believed that knowledge translation efforts are necessary to minimise these factors or at least clearly disclose and call out.

### Theme 3: Health workforce

All respondents highlighted the need for a well-trained workforce with a mix of skills that can contribute to risk communication and infodemic management activities. According to respondents, the lack of qualified and well-trained spokespersons greatly diminished the quality of risk communication activities during the pandemic. Respondents referenced a range of competencies necessary to improve the quality of the health workforce education and practice, which can also be used to design new educational courses and curriculums.

All respondents agreed that the Iranian scientists and experts have not helped substantially to mitigate the effects of the infodemic and prevent misinformation. In some cases, scientists and academic experts in infodemic management were considered sources of misinformation, seen as contributing to the infodemic trends by publishing low-quality scientific papers and providing sensational or exaggerated information about new treatments. In addition, over half of the respondents highlighted the need to involve professional councils, NGOs, health volunteers, and interested experts as additional workforce sources to improve the speed and effectiveness of the response to misinformation and infodemic. Therefore, involving public health agencies, epidemiologists, data scientists, and sociologists who have unique expertise and credibility to guide risk communication and infodemic management is recommended.

### Theme 4: Financing

Three respondents highlighted effective financial resource allocation to risk communication and infodemic management to support communication strategies during the crisis. One respondent argued that multi-sector collaborations could reduce the risk of underfunding communication responses. Using technology-based interventions, such as text-messaging approaches, could improve the cost-effectiveness of communication strategies.

### Theme 5: Media

All respondents mentioned characteristics related to media. About half of the respondents argued that TV and mass media contributed to the COVID-19 infodemic. Broadcasting misleading and low-value information, inviting unprofessional experts, and raising debates about the performance of public health agencies reduced public trust and led the community to informal and social media channels. However, with the broad coverage and penetration of radio and TV as dominant communication channels in most parts of the country, involvement, and collaboration with mass media, including radio and TV, could improve the effectiveness of risk communication strategies.

The need to improve government and health authorities' websites to disseminate real-time and high-quality information was mentioned by three respondents. Governmental websites are considered the source of credible information for most people. Still, the weak contribution of these media in risk communication and infodemic management was considered as a barrier to preventing misinformation. Respondents frequently mentioned social media platforms as important communication channels for most communities. According to two respondents, dissemination of valid and high-quality data through social media channels influenced the impact of local interventions and improved vaccination coverage for vulnerable and ethnic populations, particularly in Sistan-va-Baluchestan and West Azerbaijan. Due to

1  
2  
3 higher accessibility, social media platforms were highly utilised by younger adults and geographically  
4 distanced locations; therefore, using these platforms to address distanced populations can improve the  
5 speed and effectiveness of interventions. In addition, reduced public trust in formal and government  
6 communication channels highlighted the perceived credibility and trustworthiness of social media  
7 platforms. This can affect the community's acceptance of public health interventions.  
8  
9

#### 10 Theme 6: Community

11 The community is frequently reported as an important characteristic of risk communication and  
12 infodemic management. Listening to the community's concerns, identifying their information needs,  
13 communicating with communities, and adjusting based on their diversity, culture, and ethnicity are the  
14 cornerstone components of risk communication during the crisis. However, available experiences  
15 suggested that the lack of community-based approaches reduced the effectiveness of risk  
16 communication efforts during the COVID-19 pandemic in most provincial settings. Training critical  
17 thinking, media, and health literacy should be considered and highly prioritised to improve engagement  
18 and active contribution of people in risk communication and infodemic management. Competent and  
19 well-empowered communities could minimise misinformation and infodemic consequences and enable  
20 communities to develop their own solutions. In this context, building and maintaining public trust in  
21 public health agencies, health professionals, and government authorities could maximise social cohesion  
22 and successfully respond to potential risks during the crisis.  
23  
24  
25  
26  
27

#### 28 **Phase 2: Expert panel using the NGT approach**

29 In this phase, the proposed conceptual model of RCIM in Iran was discussed by the online expert panel,  
30 and the trustworthiness of the model was finally approved by the entire panel members (100%  
31 agreement) (Figure1).  
32  
33  
34  
35

36  
37 Figure 1: A conceptual model of components and infrastructures of health risk communication and  
38 infodemic management system in Iran  
39  
40  
41  
42  
43

44 The panellists recommended taking a comprehensive communication risk approach, which considers the  
45 characteristics of potential audiences and stakeholders, including the community, scientists and experts,  
46 and pharmaceutical industries through physical and virtual communication channels (Figure 2).  
47  
48

49 Figure2: Elements of the COVID-19 risk communication and infodemic management in Iran,  
50 source: own production  
51  
52  
53

#### 54 **Discussion**

55 The present research examined RCIM processes and infrastructure in Iran during the COVID-19  
56 pandemic and outlined key components of an effective RCIM model as an essential component of  
57 health emergency readiness and response activities. Further, a multi-disciplinary expert panel  
58 confirmed the credibility and trustworthiness of the proposed model. Following are some insights and  
59  
60

1  
2  
3 attention points on effective RCIM that emerged from the qualitative interviews and expert panel  
4 discussions. Our findings suggest that establishing an integrated national RCIM program, strengthening  
5 existing fundamental capacities of RCIM, and systematic listening to social concerns are essential for  
6 health emergency readiness and response activities. Epidemics and health emergencies are usually  
7 accompanied by a wave of disinformation that undermines policy responses and amplifies community  
8 distrust and concerns. Understanding the source of disinformation and responding rapidly to evolving  
9 risks can mitigate potential negative ramifications. Further, only if public concerns are entirely  
10 understood can they be adequately addressed and health information about the evolving risk  
11 communicated effectively in this context. Systematic listening refers to receiving information from and  
12 about public concerns and information needs through multiple channels, including the media, social  
13 media, and key intermediaries, and then analysing this information and responding appropriately to  
14 public needs. According to our findings, essential national and provincial capacities that explore, track,  
15 and monitor the community and high-risk groups' information needs, assess the degree to which  
16 available information matches their needs, and provide policymakers and health practitioners with the  
17 knowledge needed to implement appropriate and effective strategies that target identified information  
18 inequalities and social concerns are a required component for effective health risk communication  
19 governance.

20  
21  
22  
23  
24  
25  
26 Financial resources and technical expertise are fundamental to building such a health RCIM system. In  
27 particular, developing health risk communication and infodemic management system capacity is poorly  
28 funded in the country and technical health risk communication experts in the country are critically  
29 limited. There are media and public communication experts. Community-level health promotion experts  
30 often work in areas such as communicable diseases, child and maternal health, and other  
31 communicable or non-communicable diseases. However, effective RCIM requires personnel with  
32 training and expertise who can be available in the time-limited and high-stress conditions of an epidemic  
33 or health emergency. Some capacity-building workshops were held during the COVID-19 pandemic  
34 by the ministry of health and medical universities. Still, these have largely been ad hoc, of short duration  
35 (less than a week), and of variable quality. Those trained have often been public health professionals  
36 who then move on to other areas of public health. A planned and institutionalised approach to capacity-  
37 building is required to have an adequate pool of trained experts for epidemics and health  
38 emergencies. Therefore, financial resources and building risk communication expertise are critical  
39 priorities for the country. Obtaining both these resources will require the endorsement of senior policy-  
40 makers. Advocacy to policy-makers and key decision-makers on the role and impact of RCIM is very  
41 important.

42  
43  
44  
45  
46 RCIM is a broad and multi-disciplinary field involving health communication, health education, public  
47 affairs, behavior change communication, and social mobilisation. It is therefore required to build the  
48 capacity of key contributors to verify, filter, and curate health information and use diverse  
49 communication channels to target public audiences(27). Community-based organisations, patient  
50 advocacy groups, professional associations, and non-governmental organisations with reputable brands,  
51 organisational resources, and a network of relationships can be leveraged to improve health risk  
52 communications. Existing evidence demonstrates that by partnering with local public health experts and  
53 policymakers to create information hubs and community outreach programs(28), these groups can  
54 significantly improve their ability to serve the information needs and concerns of diverse communities  
55 while also advocating for policy solutions. Existing evidence demonstrates that involving community  
56 members as planners, and attendees in pre-crisis planning activities, leads to increased preparedness  
57  
58  
59  
60

1  
2  
3 and response activities. Therefore training in roles and responsibilities, relationship building, and team-  
4 building are required strategies to facilitate and strengthen the contribution of community-  
5 based organisations, expert associations, and other relevant partners during epidemics and health  
6 emergencies(29).  
7

8 Our findings also revealed that lack of direct financial resources allocation to health risk communication  
9 and infodemic management hindered support of risk communication activities during the pandemic in  
10 Iran. However, resource mobilisation and the use of non-governmental resources were reported as  
11 strategies to address this critical challenge within the country's national and provincial settings.  
12 According to available evidence, shortcomings in financial resources are a common challenge in health  
13 risk communication management in most countries. Evidence from south-east Asia(30) revealed that  
14 during the COVID-19 pandemic, few countries allocated resources to emergency risk communication.  
15 However, some specific areas have budgets, such as information education communication materials.  
16  
17  
18

19 Developing or sustaining reputed and well-trusted communication channels are critically required to  
20 maximise the effectiveness and impact of communication strategies. How the community perceives  
21 various epidemics and health emergencies, what they perceive to be their role, how they are  
22 influenced, and how their views tally with the biomedical approach, are not entirely investigated in the  
23 country. According to our findings, a lack of public trust in mass media and government channels  
24 directed Iranian citizens to the wide use of online social networks. Due to the dramatic reduction in  
25 social capita, most Iranians distrust governmental information sources, and this fact challenged the  
26 community's compliance with preventive behaviors (COVID-19 vaccination) during the COVID-19  
27 pandemic. Lack of trust in the government as a source of information was reported globally in existing  
28 literature. According to recent evidence, only 40% of the European citizens from the Economic Co-  
29 operation and Development countries participated in a survey and trusted their governments as sources  
30 of information about the Corona Virus(31). False claims about the activities, statistics, or policies of  
31 public and government authorities were reported as a major source of disinformation during the COVID-  
32 19 pandemic, suggesting that "governments have not always succeeded in providing clear, useful, and  
33 trusted information to address pressing public questions" (32). Meanwhile, disinformation and claims  
34 may also be falsely attributed to official and governmental sources, amplifying this problem. In this  
35 regard, delivering truthful, evidence-informed, and compelling information to various audiences  
36 through their preferred channels and understanding behavioral and psychological biases is  
37 recommended. This is especially important for young audiences, who tend to access news and  
38 information predominantly via social media platforms(33). It is, therefore, a critical issue for health risk  
39 communication and infodemic management to ensure key factual messages reach all audiences. It is  
40 also important to effectively leverage the channel through which various audiences are relayed since  
41 different groups are likelier to trust media outlets that align with their views.  
42  
43  
44  
45  
46  
47  
48  
49

50 As substantial social, contextual, economic, and geographical diversity exists within the country, health  
51 risk communication response to epidemics and health emergencies will also require diverse community-  
52 based approaches. Ethnographic and anthropological/social research on epidemics and health  
53 emergencies in the country will help to improve understanding of the acceptability of response to  
54 emergencies and public health interventions. According to our interviews and expert panel discussion,  
55 the community was considered as a missing piece of RCIM strategies in Iran. Information needs and  
56 concerns (e.g., disabilities, gender, age, literacy, cultural/ethnic backgrounds, access to technology) of  
57 the general Iranian population remained unexplored. In addition, the participatory engagement of  
58 citizens in a collective response to the COVID-19 infodemic was not just insufficient at times but also  
59  
60



discouraged in several instances. During the COVID-19 pandemic, national health authorities and governments in most countries predominantly demonstrated top-down communication strategies (34). Effective RCIM requires a whole-of-society effort to sustain a healthy information ecosystem. Understanding the needs and concerns of vulnerable groups who might experience barriers to accessing accurate health information, care, and support, or be at higher risk of exposure and secondary impacts, such as children and adults with disabilities, is critically important (34). Effective risk communication can save lives during epidemics and health emergencies; however, existing evidence revealed that inadequate risk communication resulted in high exposure and loss of lives, as seen in Iran and Italy in the first wave (34, 35). Training and advising the general population on how to consume and share health information responsibly may be an effective strategy to improve the engagement and participation of public communities in risk communication and infodemic management. Investing in the community's media literacy, health literacy, and critical thinking skills before the crisis can prepare society to mitigate the physical and emotional consequences of false news and disinformation and increase resilience (36). As disinformation and infodemic during epidemics and health emergencies undermine trust, amplify fears and consequently affect countries' responses to the global pandemic, tailored strategies to build and maintain trust among the public community are of utmost importance. Therefore, to be effective and foster public trust in government, any activities conducted in health risk communication and infodemic management must be guided by the principles of transparency, integrity, accountability, and community participation.

We address some limitations of the study. First, as qualitative research is open-ended, respondents have more control over the content of the data collected, and the investigator fails to verify the results objectively. Additionally, investigating causality and replicating the study is rather difficult in qualitative studies. Second, the nature of purposive sampling may generate a sampling bias in our results. Particularly, included provinces may only be a representative sample of some of the public health systems in Iran. Second, our findings are based on data collected during the last wave of the pandemic. As the RCIM strategies have evolved and improved during different waves of the pandemic, and lessons from the first waves of COVID-19 and other countries' experiences helped all stakeholders to be better prepared for further waves of the pandemic; therefore, challenges and gaps of RCIM activities in previous waves may not extensively be revealed by the study participants. However, challenges and gaps experienced during the first waves of the pandemic may not always be consistent in the future. Therefore, our findings from the last waves of the pandemic provide information for building an overall perspective to understand the strengths and limitations of RCIM activities in Iran.

## Conclusion

This study focused on how ineffective RCIM impeded the emergency response in Iran's COVID-19 management and discussed principal infrastructures and processes for effective risk communication. Following a qualitative approach, it was found that Iran's government and national public health authorities did not infuse a scientific and strategic RCIM into decision-making. Consequently, access to high-quality and real-time information was extensively restricted, and not publicly available, and the provincial public health settings failed to establish effective community engagements including experts, researchers, professional councils, and NGOs to facilitate knowledge translation and utilisation. Further, the extensive use of social media platforms and mass media worsened the circulation of rumours, fake news, and disinformation and led to public distrust. The lessons learned from the outbreak management and response in Iran suggest that RCIM should be an essential component of health



1  
2  
3 emergency readiness and response activities. A national RCIM program should be established to  
4 support the required infrastructures, personnel, and processes to address communication challenges  
5 during epidemics and health emergencies. This should be based on a conceptual model of RCIM to  
6 illustrate a collaborative and interdependent context of risk communication activities, implying that any  
7 improvements in these areas require an integrated and holistic approach. The government,  
8 pharmaceutical industries, experts, and the public should be involved in time, contributing diverse views  
9 and fulfilling respective responsibilities. The conceptual model presented here has the potential to be  
10 either be implemented or serve as the foundation for the creation of a similar model in other contexts.  
11 Sharing experiences, challenges, and leading practices among jurisdictions can further improve the  
12 reliability and credibility of guidance and strategies.  
13  
14  
15

### 16 17 **Ethics approval and consent to participate** 18

19 This study was approved by the Research Ethics Committee of Kerman University of Medical Sciences  
20 (IR.KMU.REC.1400.379). The Declaration of Helsinki was followed and informed consent was obtained  
21 from participants before starting the data collection stage.  
22  
23

### 24 25 **Availability of data and materials** 26

27 The datasets used and/or analysed during the current study are available from the corresponding  
28 author on reasonable request.  
29

### 30 31 **Competing interests** 32

33 All authors declared that they had no competing interests.  
34

### 35 36 **Funding** 37

38 This study was financially supported by World Health Organization-Regional Office for the Eastern  
39 Mediterranean (WHO-EMR) Call for Proposals for Special Grant for COVID-19 Research, 2022 (WHO  
40 Reference: 2022/1291032-0)  
41

### 42 43 **Authors' contributions** 44

45 AB contributed to the project concept and manuscript design, qualitative data collection and  
46 interpretation, critical review of the manuscript writing and discussion of the manuscript. AS worked on  
47 data analysis, data interpretation, writing of the manuscript. MSB worked on data analysis, data  
48 interpretation, writing of the manuscript. HM worked on literature search, data interpretation, writing  
49 of the manuscript. MS worked on data analysis, data interpretation, writing of the manuscript. JMG  
50 worked on data analysis, data interpretation, writing of the manuscript. HS worked on the project  
51 concept and manuscript design, supervising, critical review of the manuscript writing and discussion of  
52 the manuscript. All authors read and approved the final manuscript  
53  
54

### 55 56 **Patient or public involvement** 57

58 No patient or public was involved in the present study.  
59  
60

## Acknowledgements

The authors wish to thank provincial and national public health professionals who contributed to this study for all their scientific support to the research project and team members.

## References

1. Muñoz-Sastre D, Rodrigo-Martín L, Rodrigo-Martín I. The Role of Twitter in the WHO's Fight against the Infodemic. *International Journal of Environmental Research and Public Health*. 2021;18(22):11990.
2. Mheidly N, Fares J. Leveraging media and health communication strategies to overcome the COVID-19 infodemic. *Journal of Public Health Policy*. 2020;41(4):410-20.
3. The Lancet Infectious D. The COVID-19 infodemic. *The Lancet Infectious diseases*. 2020;20(8):875-.
4. Health Topics: Infodemic [Internet]. Available from: [https://www.who.int/health-topics/infodemic#tab=tab\\_1](https://www.who.int/health-topics/infodemic#tab=tab_1).
5. Yang K-C, Pierri F, Hui P-M, Axelrod D, Torres-Lugo C, Bryden J, et al. The covid-19 infodemic: Twitter versus facebook. *Big Data & Society*. 2021;8(1):20539517211013861.
6. Patel MP, Kute VB, Agarwal SK, Nephrology C-WGoISo. "Infodemic" COVID 19: More Pandemic than the Virus. *Indian journal of nephrology*. 2020;30(3):188-91.
7. Rathore FA, Farooq FJJPMA. Information overload and infodemic in the COVID-19 pandemic. 2020;70(5):S162-S5.
8. Fernández-Torres MJ, Almansa-Martínez A, Chamizo-Sánchez R. Infodemic and fake news in Spain during the COVID-19 pandemic. *International journal of environmental research and public health*. 2021;18(4):1781.
9. Vinck P, Pham PN, Bindu KK, Bedford J, Nilles EJ. Institutional trust and misinformation in the response to the 2018–19 Ebola outbreak in North Kivu, DR Congo: a population-based survey. *The Lancet Infectious Diseases*. 2019;19(5):529-36.
10. Sørensen K, Pelikan JM, Röthlin F, Ganahl K, Slonska Z, Doyle G, et al. Health literacy in Europe: comparative results of the European health literacy survey (HLS-EU). *European journal of public health*. 2015;25(6):1053-8.
11. Lorini C, Ierardi F, Bachini L, Donzellini M, Gemmi F, Bonaccorsi G. The antecedents and consequences of health literacy in an ecological perspective: results from an experimental analysis. *International journal of environmental research and public health*. 2018;15(4):798.
12. Carr-Hill R, Currie E. What explains the distribution of doctors and nurses in different countries, and does it matter for health outcomes? *Journal of Advanced Nursing*. 2013;69(11):2525-37.
13. Zar HJ, Dawa J, Fischer GB, Castro-Rodriguez JA. Challenges of COVID-19 in children in low-and middle-income countries. *Paediatric respiratory reviews*. 2020;35:70-4.
14. Lohiniva AL, Pensola A, Hyökki S, Sivelä J, Tammi T. COVID-19 risk perception framework of the public: an infodemic tool for future pandemics and epidemics. *BMC Public Health*. 2022;22(1):1-9.
15. Islam MS, Sarkar T, Khan SH, Kamal A-HM, Hasan SM, Kabir A, et al. COVID-19-related infodemic and its impact on public health: A global social media analysis. *The American journal of tropical medicine and hygiene*. 2020;103(4):1621.
16. Karabela ŞN, Coşkun F, Hoşgör H. Investigation of the relationships between perceived causes of COVID-19, attitudes towards vaccine and level of trust in information sources from the perspective of Infodemic: the case of Turkey. *BMC Public Health*. 2021;21(1):1-2.
17. Organization WH. Infodemic management: an overview of infodemic management during COVID-19, January 2020–May 2021. 2021.

18. Tangcharoensathien V, Calleja N, Nguyen T, Purnat T, D'Agostino M, Garcia-Saiso S, et al. Framework for managing the COVID-19 infodemic: methods and results of an online, crowdsourced WHO technical consultation. *Journal of medical Internet research*. 2020;22(6):e19659.
19. Lohiniva A-L, Nurzhynska A, Hudi A-h, Anim B. Infodemic Management Using Digital Information and Knowledge Cocreation to Address COVID-19 Vaccine Hesitancy: Case Study From Ghana. *JMIR infodemiology*. 2022;2(2):e37134.
20. Naeem SB, Bhatti R. The Covid-19 'infodemic': a new front for information professionals. *Health Information & Libraries Journal*. 2020;37(3):233-9.
21. Eysenbach G. How to fight an infodemic: the four pillars of infodemic management. *Journal of medical Internet research*. 2020;22(6):e21820.
22. Radu R. <? covid19?> Fighting the 'Infodemic': Legal Responses to COVID-19 Disinformation. *Social Media+ Society*. 2020;6(3):2056305120948190.
23. Hua J, Shaw R. Corona virus (Covid-19) "infodemic" and emerging issues through a data lens: The case of china. *International journal of environmental research and public health*. 2020;17(7):2309.
24. Olson CM. Consensus statements: applying structure. *JAMA*. 1995;273(1):72-3.
25. Geerts JM, Kinnair D, Taheri P, Abraham A, Ahn J, Atun R, et al. Guidance for health care leaders during the recovery stage of the COVID-19 pandemic: a consensus statement. *JAMA network open*. 2021;4(7):e2120295-e.
26. Eysenbach G. Infodemiology and infoveillance: framework for an emerging set of public health informatics methods to analyze search, communication and publication behavior on the Internet. *Journal of medical Internet research*. 2009;11(1):e1157.
27. Goulbourne T, Yanovitzky I. The communication infrastructure as a social determinant of health: implications for health Policymaking and practice. *The Milbank Quarterly*. 2021;99(1):24.
28. Hering JG. Do we need "more research" or better implementation through knowledge brokering? *Sustainability Science*. 2016;11(2):363-9.
29. World Health Organization. Communicating risk in public health emergencies: a WHO guideline for emergency risk communication (ERC) policy and practice: World Health Organization; 2017.
30. Ofrin R, Buddha N, Htike M, Bhola A, Bezbaruah S. Strengthening risk communication systems for public health emergencies in the WHO South-East Asia Region. *WHO South-East Asia Journal of Public Health*. 2020;9(1):15-20.
31. Eldman. Eldman Trust Barometer 2020 2020 [Available from: [https://www.edelman.com/sites/g/files/aatuss191/files/2020-03/2020%20Edelman%20Trust%20Barometer%20Coronavirus%20Special%20Report\\_0.pdf](https://www.edelman.com/sites/g/files/aatuss191/files/2020-03/2020%20Edelman%20Trust%20Barometer%20Coronavirus%20Special%20Report_0.pdf)].
32. Brennen JS, Simon FM, Howard PN, Nielsen RK. Types, sources, and claims of COVID-19 misinformation: University of Oxford; 2020.
33. Neavel C, Watkins SC, Chavez M. Youth, Social Media, and Telehealth: How COVID-19 Changed Our Interactions. *Pediatric Annals*. 2022;51(4):e161-e6.
34. Khan S, Mishra J, Ahmed N, Onyige CD, Lin KE, Siew R, et al. Risk communication and community engagement during COVID-19. *International Journal of Disaster Risk Reduction*. 2022;74:102903.
35. Chakrabarti A. Confusion in Italy, clarity in Singapore — how govts are communicating during coronavirus 2020 [cited 2022 26/11]. Available from: <https://theprint.in/world/confusion-in-italy-clarity-in-singapore-how-govts-are-communicating-during-coronavirus/378932/>.
36. Xie L, Pinto J, Zhong B. Building community resilience on social media to help recover from the COVID-19 pandemic. *Computers in Human Behavior*. 2022;134:107294.

| <br><b>Leadership &amp; governance</b>                                                                                                                                                                                                                                                                                                                                                                                                                                                                                                                                                           | <br><b>Information</b>                                                                                                                                                                                                                                                                                                                                                                                                                                                                 | <br><b>Health workforce</b>                                                                                                                                                                                                                                                                                           | <br><b>Financing</b> | <br><b>Media</b>                                                                                                                                                                                                                                                                                                                                                                                                                                        | <br><b>Community</b>                                                                                                                                                                                                                                                                                                                                                                                                              |
|-----------------------------------------------------------------------------------------------------------------------------------------------------------------------------------------------------------------------------------------------------------------------------------------------------------------------------------------------------------------------------------------------------------------------------------------------------------------------------------------------------------------------------------------------------------------------------------------------------------------------------------------------------------------------------------|-------------------------------------------------------------------------------------------------------------------------------------------------------------------------------------------------------------------------------------------------------------------------------------------------------------------------------------------------------------------------------------------------------------------------------------------------------------------------------------------------------------------------------------------------------------------------|--------------------------------------------------------------------------------------------------------------------------------------------------------------------------------------------------------------------------------------------------------------------------------------------------------------------------------------------------------------------------------------------------------|-------------------------------------------------------------------------------------------------------|--------------------------------------------------------------------------------------------------------------------------------------------------------------------------------------------------------------------------------------------------------------------------------------------------------------------------------------------------------------------------------------------------------------------------------------------------------------------------------------------------------------------------------------------|----------------------------------------------------------------------------------------------------------------------------------------------------------------------------------------------------------------------------------------------------------------------------------------------------------------------------------------------------------------------------------------------------------------------------------------------------------------------------------------------------------------------|
| <p><b>Structure</b><br/>Clearly defined roles, supports, and accountabilities</p> <p><b>Ethics</b><br/>Equity, transparency, and accountability</p> <p><b>System capacity</b><br/>Develop infrastructures for monitoring, infodemiology, infoveillance, social listening, communicating, and distilling the science</p> <p><b>Operational</b><br/>Develop, implement and evaluate communication policies and strategies for potential risks</p> <p><b>Engagement</b><br/>Create population and multisector involvement for risk communication</p> <p><b>Institutional/provincial design</b><br/>Polycentric governance to spread the impact of the risk and use crowdsourcing</p> | <p><b>Platform</b><br/>Develop a networked platform for real-time and reliable data collection</p> <p><b>Surveillance</b><br/>Use the information to investigate, prepare, and effectively respond to challenges</p> <p><b>Policy making</b><br/>Use of surveillance data for evidence-based decision making</p> <p><b>Evaluation</b><br/>Regular monitoring and analysis of the system for continuous quality and reliability of data sources</p> <p><b>Knowledge Translation</b><br/>Develop, implement, support and facilitate accurate knowledge transformation</p> | <p><b>Diversity and flexibility</b><br/>Train, and adjust to evolving needs and challenges and a mix of skills in all parts of the system</p> <p><b>Limited resources</b><br/>Adequate number of professionals even with scarce resources</p> <p><b>Community involvement</b><br/>Resource capacity beyond health professionals such as scientists &amp; experts, professional councils, and NGOs.</p> | <p><b>Resource allocation</b><br/>Effective use of diverse financial resources</p>                    | <p><b>Mass Media</b><br/>Develop communication channels through Television, and newspapers</p> <p><b>Government &amp; health authorities' websites</b><br/>Develop validated sources of information with high accessibility, and timeliness</p> <p><b>Social media platforms</b><br/>Use social media to improve validity, and accessibility and combat misinformation</p> <p><b>Source Credibility</b><br/>Build and maintain trust in formal sources</p> <p><b>Formal Spokespersons</b><br/>Use credible &amp; qualified individuals</p> | <p><b>Diversity</b><br/>Respond to the diverse needs of communities with different cultures, ethnicity, and geographies</p> <p><b>Engagement</b><br/>Involve, consult, inform, engage and collaborate with diverse cultural, and ethnic communities</p> <p><b>Resilience</b><br/>Improve health, media, and digital literacy</p> <p><b>Empowerment</b><br/>Enable communities to develop their own solutions</p> <p><b>Trust</b><br/>Build and maintain trust to maximise social cohesion and successful respond</p> |

Figure 1

248x158mm (96 x 96 DPI)

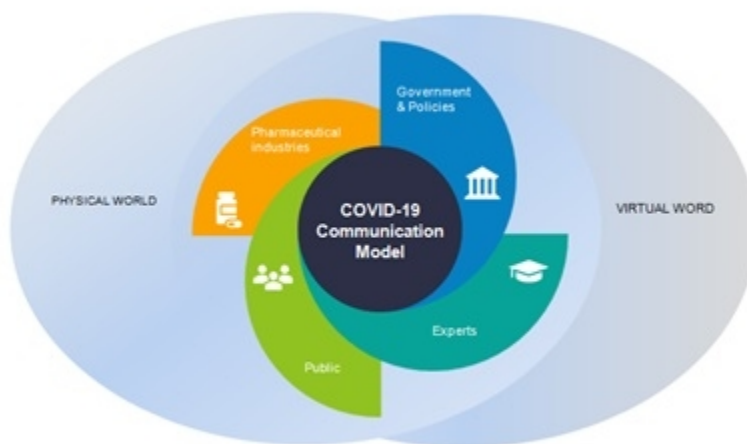

Figure 2

106x77mm (96 x 96 DPI)

## Interview guide

## Part I: Demographic information

Age .....

Gender Female / Male

Educational level .....

Academic discipline .....

What organizational position were you involved in at the time of the Covid 19 epidemic? .....

## Part II: Perceptions, experiences, future directions

The main purpose of the questions in this section is to identify effective strategies and successful experiences in the field of infodemic management related to Covid 19 in Kerman province. Please answer the following questions based on your experiences or field observations.

- 1- The spread of misleading, inaccurate, and fake information about COVID-19 disease and vaccination has been one of the consequences of the COVID-19 epidemic, which affects the behavior of society and trust in the health system. What experience did you have in managing misinformation? What did you do in a situation in the province where accurate information was not yet available? Can you explain your own experiences in this field?
- 2- 2. What challenges and obstacles did you face in combating inaccurate information and infodemic management?
- 3- What did you do in response to the obstacles and challenges?
- 4- How did you find out about the effectiveness of your interventions and actions?
- 5- 5- If the pandemic situation is repeated, what is your approach to managing infodemic?

## Informed Consent

Hi,

My name is Azam Bazrafshan. My colleague and I are from the Kerman University of Medical Sciences. We interview executives, technical experts, decision-makers, and leaders of public health initiatives who had participated in the provincial, or national COVID-19 prevention and control programs to use the results to improve health interventions during epidemics, pandemics, and global health crises. We are intended to investigate processes, infrastructure, strategies, successful experiences and challenges in the field of infodemic management related to Covid 19 in Kerman province. You are being invited to take part in this research because we feel that your experience as a public health leader can contribute much to our understanding and knowledge of processes and infrastructure of infodemic management during health epidemics.

Your participation in this research is entirely voluntary. It is your choice whether to participate or not. If you choose not to participate all the services you receive at this Centre will continue and nothing will change.

In this interview, I will not ask your name, nor will I need your address. All your answers will be completely confidential. We only use the total responses for statistical survey. During this interview, private questions may also be asked and I have to emphasize that although your honest cooperation is valuable, you can answer any question you think appropriate. The estimated time of interview is about 30 minutes and the interview is recorded by tape recorder.

You do not have to take part in this research if you do not wish to do so, and choosing to participate will not affect your job or job-related evaluations in any way. You may stop participating in the interview at any time that you wish without your job being affected. I will give you an opportunity at the end of the interview to review your remarks, and you can ask to modify or remove portions of those, if you do not agree with my notes or if I did not understand you correctly.

**I have read the foregoing information, or it has been read to me. I have had the opportunity to ask questions about it and any questions I have been asked have been answered to my satisfaction. I consent voluntarily to be a participant in this study**

**Signature of Participant** \_\_\_\_\_

**Date** \_\_\_\_\_ **Day/month/year**

Signature



Appendix 3. Themes and subthemes related to the challenges and successful activities of infodemic management across provincial/national public health settings in Iran

| Theme                              | Sub-theme               | Sample Quotes                                                                                                                                                                                                                                                                                                                                                        |
|------------------------------------|-------------------------|----------------------------------------------------------------------------------------------------------------------------------------------------------------------------------------------------------------------------------------------------------------------------------------------------------------------------------------------------------------------|
| <b>Leadership &amp; governance</b> |                         |                                                                                                                                                                                                                                                                                                                                                                      |
| Ethics                             | Transparency            | When I report falsely on the radio, people would understand. If I have this transparency at the national and university level, people will gain their trust, but this strategy does not exist, it certainly does not exist, neither at the national level, nor at the university or provincial level. (Man, 47 years old)                                            |
|                                    |                         | There is a level of transparency that the government should have, the officials should have, I would say that it is extremely small considering the structure of our country. (Man, 42 years old)                                                                                                                                                                    |
|                                    | Accountability          | No one was responsible, a disaster happened, I learned by myself, it was unknown to us, we could have managed this if the ministry had interfered less, the ministry acted badly and this bad behavior spread everywhere.(Man, 55 years old)                                                                                                                         |
|                                    | Conflicts of interests  | Conflict of interests is one of the most important challenges in the Ministry of Health, which hinders transparency. Profit seeking of companies that produce personal protective equipment, diagnostic and therapeutic equipment, and vaccines, is One of the most important examples of conflicts of interests during the pandemic management. (Man, 70 years old) |
| Capacity                           | Infrastructures         | We need a quick reaction team that is in contact with academic centers, regularly monitors and examines community's needs and concerns. (Man, 49 years old)                                                                                                                                                                                                          |
|                                    |                         | ... and can quickly identify rumours and false information and design an answer to them. (Man, 42 years old)                                                                                                                                                                                                                                                         |
|                                    |                         | A multi-disciplinary risk communication team should be formed to be responsible for informing and making decisions. (Man, 58 years old)                                                                                                                                                                                                                              |
|                                    | Rules & regulations     | During the pandemic, there were people who published false and contradictory information, and there was no authority to deal with this issue and deal with them judicially, while in many countries, when the issue of people's health is discussed, false information is not allowed to be published. (Man, 70 years old)                                           |
|                                    | Policies and strategies | There is no specific strategy and program to deal with infodemic and manage risk communication in the country. (Man, 70 years old)                                                                                                                                                                                                                                   |
|                                    | Role definition         | The duties and responsibilities of people in crisis situations should be clear so that everyone does not act and speak as they wish... The goals of the programs should be clear and the responsibilities of each member of the committees should be clearly stated. (Man, 53 years old)                                                                             |
| Operational isation                | Timeliness              | In order to prepare in crisis conditions, it is necessary to make necessary plans before every crisis. (Man, 45 years old)                                                                                                                                                                                                                                           |
|                                    | Coordination            | One of our most important problems was the lack of coordination between the government and the officials in the matter of information. There were several voices and no coordination between different sources in the health department. (Man, 58 years old)                                                                                                         |

|                                 |                                 |                                                                                                                                                                                                                                                                                                                                                                                                                                                                                                                                                                                                                                                 |
|---------------------------------|---------------------------------|-------------------------------------------------------------------------------------------------------------------------------------------------------------------------------------------------------------------------------------------------------------------------------------------------------------------------------------------------------------------------------------------------------------------------------------------------------------------------------------------------------------------------------------------------------------------------------------------------------------------------------------------------|
| Institutional/provincial design | Knowledge exchange              | In the discussion of pandemic management, the provinces were left to their own devices, and no province was aware of the activities of other provinces in the management of the infodemic. (Man, 55 years old)                                                                                                                                                                                                                                                                                                                                                                                                                                  |
| <b>Information</b>              |                                 |                                                                                                                                                                                                                                                                                                                                                                                                                                                                                                                                                                                                                                                 |
| <b>Theme</b>                    | <b>Sub-theme</b>                | <b>Sample quotes</b>                                                                                                                                                                                                                                                                                                                                                                                                                                                                                                                                                                                                                            |
| Surveillance                    | Timeliness                      | No real-time data were available about the mortality of COVID-19 cases. Even now, if we refer to the statistical systems, we will not get a correct and reliable information and coordination so that we can inform the community. (Man, 48 years old)<br><br>Unfortunately, many of the events that happened in the country have not been documented and, for example, we do not know how many patients were infected with Corona, how many died. Even the medical and nursing systems used to come and give general information. It showed that either they don't have this information or they don't want to publish it. (Man, 49 years old) |
|                                 | Data quality                    | No consensus data were available as mortality data reported by the hospitals, forensic systems, and cemeteries, were very contradictory. (Man, 48 years old)                                                                                                                                                                                                                                                                                                                                                                                                                                                                                    |
|                                 | Surveillance systems            | Surveillance data were extremely out of date, with low quality and consistency. (Man, 54 years old)<br><br>Our surveillance data were not accurate and real-time. (Man, 48 years old)<br><br>Therefore, it seems that we need a system that collects information from the environmental levels in a database in the form of software that has the power of analysis to give us alarms in different places. Its infrastructure in the country is planned as a syndromic care system, but I don't know if it has actually been implemented. (Man, 49 years old)                                                                                   |
| Knowledge translation           | Evidence-informed policy making | No evidence about the effectiveness of interventions were synthesised and published for decision making. (Man, 54 years old)<br><br>The next problem was that the correct information did not reach those who should manage infodemic, for example, the number of patients at any moment, the number of deaths, what was the cause of death. (Man, 52 years old)                                                                                                                                                                                                                                                                                |
|                                 | Knowledge translation Capacity  | Most of the statistics and information will be based on taste and subjective and this will cause individual perceptions and people will allow themselves to give any statistics. (Man, 48 years old)                                                                                                                                                                                                                                                                                                                                                                                                                                            |
| <b>Health workforce</b>         |                                 |                                                                                                                                                                                                                                                                                                                                                                                                                                                                                                                                                                                                                                                 |
| <b>Theme</b>                    | <b>Sub-theme</b>                | <b>Sample Quote</b>                                                                                                                                                                                                                                                                                                                                                                                                                                                                                                                                                                                                                             |
| Capacity building               | Diversity and flexibility       | That's why we have to find an entry in the educational fields and teach this issue seriously in the form of workshops for groups close to graduation or students in the form of refresher courses regularly and continuously. Let's define a retraining unit for it and implement it operationally, not just theoretically. (Man, 48 years old)                                                                                                                                                                                                                                                                                                 |
| Challenges                      | Limited resources               | One of our most important challenges in risk communication and infodemic management is the lack of trained and expert people in this field. (Man, 70 years old)                                                                                                                                                                                                                                                                                                                                                                                                                                                                                 |

|                            |                                           |                                                                                                                                                                                                                                                                                                                                                                                                                     |
|----------------------------|-------------------------------------------|---------------------------------------------------------------------------------------------------------------------------------------------------------------------------------------------------------------------------------------------------------------------------------------------------------------------------------------------------------------------------------------------------------------------|
| Engagement                 | Community involvement                     | The non-participation of experts from different scientific fields in the pandemic management and informing the people was a big challenge, which caused people who had good experience or knowledge to be ignored, and therefore, unqualified people were in charge of informing the people. (Man, 42 years old)                                                                                                    |
| <b>Financial resources</b> |                                           |                                                                                                                                                                                                                                                                                                                                                                                                                     |
| <b>Theme</b>               | <b>Sub-theme</b>                          | <b>Sample Quote</b>                                                                                                                                                                                                                                                                                                                                                                                                 |
| Government resources       | Planning                                  | Particular financial sources should be allocated to the risk communication activities. (Man, 66 years old)                                                                                                                                                                                                                                                                                                          |
| <b>Media</b>               |                                           |                                                                                                                                                                                                                                                                                                                                                                                                                     |
| <b>Theme</b>               | <b>Sub-theme</b>                          | <b>Sample Quote</b>                                                                                                                                                                                                                                                                                                                                                                                                 |
| Communication channels     | Mass media                                | National TV and Radio channels are still the biggest and most influential communication channels in Iran. (Man, 46 years old)                                                                                                                                                                                                                                                                                       |
|                            | Government & health authorities' websites | We used both video media such as radio and television, as well as written media such as magazines, newspapers, and government websites, which were very active during the Corona era, to communicate the data related to the incidence of the disease in the province and recommend preventive measures. (Man, 49 years old)                                                                                        |
|                            | Social media platforms                    | We have established a social media platform (Instagram) named Dr+ to communicate with people and held online discussion panels with contribution of clinical physicians to address the community's needs and concerns. (Man, 53 years old)                                                                                                                                                                          |
| Trust                      | Source credibility                        | Communication channels should be used that are highly credible and people trust to them. Some brand communication channels should be developed to maximize the impact and penetration of information among people. (Man, 47 years old)                                                                                                                                                                              |
| spokespersons              | Competence                                | For a person to be a spokesperson and to give information, to know how to give information, not to be too hopeful, not to speak too hopelessly, this is real information when we say not only to report numbers... For example, when the pandemic came, someone said that there is nothing, someone said Wow, we are unfortunate, which one of these people should accept when they look at it? (Man, 58 years old) |
| <b>Community</b>           |                                           |                                                                                                                                                                                                                                                                                                                                                                                                                     |
| <b>Theme</b>               | <b>Sub-theme</b>                          | <b>Example Strategies</b>                                                                                                                                                                                                                                                                                                                                                                                           |
| Diversity                  | Social context                            | The penetration rate of scientific issues in our society is low, which is related to various issues, so if we ever want to increase this penetration rate, we have to approach from different social and cultural aspects. (Man, 54 years old)                                                                                                                                                                      |
| Engagement & empowerment   | interventions                             | We have developed a community engagement facility to listen the community's needs and expectations and answer to their concerns and questions interactively. (Man, 55 years old)<br><br>Safirane-Salamat was a group of trained volunteers who communicate health information with their families and their neighbourhood. (Man, 55 years old)                                                                      |

|                                                                                                                                                                                                                                                                                                                                                             |       |                                          |                                                                                                                                                                                                                                                                                                                                                                                                                                                             |
|-------------------------------------------------------------------------------------------------------------------------------------------------------------------------------------------------------------------------------------------------------------------------------------------------------------------------------------------------------------|-------|------------------------------------------|-------------------------------------------------------------------------------------------------------------------------------------------------------------------------------------------------------------------------------------------------------------------------------------------------------------------------------------------------------------------------------------------------------------------------------------------------------------|
| 1<br>2<br>3<br>4<br>5<br>6<br>7<br>8<br>9<br>10<br>11<br>12<br>13<br>14<br>15<br>16<br>17<br>18<br>19<br>20<br>21<br>22<br>23<br>24<br>25<br>26<br>27<br>28<br>29<br>30<br>31<br>32<br>33<br>34<br>35<br>36<br>37<br>38<br>39<br>40<br>41<br>42<br>43<br>44<br>45<br>46<br>47<br>48<br>49<br>50<br>51<br>52<br>53<br>54<br>55<br>56<br>57<br>58<br>59<br>60 | Trust | Trust to government and health officials | Public opinion has no trust in the government, especially in matters that are officially announced. (Man, 47 years old)<br><br>Anyone, any scientist, any distinguished person, any accepted person comes and says something, the first time people do not accept it, especially if it is actually what the government says or emphasizes, people will definitely look for the opposite and say that there is something fishy about it. (Man, 53 years old) |
|-------------------------------------------------------------------------------------------------------------------------------------------------------------------------------------------------------------------------------------------------------------------------------------------------------------------------------------------------------------|-------|------------------------------------------|-------------------------------------------------------------------------------------------------------------------------------------------------------------------------------------------------------------------------------------------------------------------------------------------------------------------------------------------------------------------------------------------------------------------------------------------------------------|

## Standards for reporting qualitative research (SRQR) checklist

| No                        | Topic                                      | Item                                                                                                                                                                                                                                                                                                                                             | Page number |
|---------------------------|--------------------------------------------|--------------------------------------------------------------------------------------------------------------------------------------------------------------------------------------------------------------------------------------------------------------------------------------------------------------------------------------------------|-------------|
| <b>Title and abstract</b> |                                            |                                                                                                                                                                                                                                                                                                                                                  |             |
| S1                        | Title                                      | Concise description of the nature and topic of the study Identifying the study as qualitative or indicating the approach (e.g., ethnography, grounded theory) or data collection methods (e.g., interview, focus group) is recommended                                                                                                           | 1           |
| S2                        | Abstract                                   | Summary of key elements of the study using the abstract format of the intended publication; typically includes background, purpose, methods, results, and conclusions                                                                                                                                                                            | 1           |
| <b>Introduction</b>       |                                            |                                                                                                                                                                                                                                                                                                                                                  |             |
| S3                        | Problem formulation                        | Description and significance of the problem/phenomenon studied; review of relevant theory and empirical work; problem statement                                                                                                                                                                                                                  | 2           |
| S4                        | Purpose or research question               | Purpose of the study and specific objectives or questions                                                                                                                                                                                                                                                                                        | 3           |
| <b>Methods</b>            |                                            |                                                                                                                                                                                                                                                                                                                                                  |             |
| S5                        | Qualitative approach and research paradigm | Qualitative approach (e.g., ethnography, grounded theory, case study, phenomenology, narrative research) and guiding theory if appropriate; identifying the research paradigm (e.g., postpositivist, constructivist/ interpretivist) is also recommended; rationale                                                                              | 4           |
| S6                        | Researcher characteristics and reflexivity | Researchers' characteristics that may influence the research, including personal attributes, qualifications/experience, relationship with participants, assumptions, and/or presuppositions; potential or actual interaction between researchers' characteristics and the research questions, approach, methods, results, and/or transferability | -           |
| S7                        | Context                                    | Setting/site and salient contextual factors; rationale                                                                                                                                                                                                                                                                                           | 4           |
| S8                        | Sampling strategy                          | How and why research participants, documents, or events were selected; criteria for deciding when no further sampling was necessary (e.g., sampling saturation); rationale                                                                                                                                                                       | 4           |

|                  |                                                                                              |                                                                                                                                                                                                                                                                                                       |                     |
|------------------|----------------------------------------------------------------------------------------------|-------------------------------------------------------------------------------------------------------------------------------------------------------------------------------------------------------------------------------------------------------------------------------------------------------|---------------------|
| S9               | Ethical issues pertaining to human subjects                                                  | Documentation of approval by an appropriate ethics review board and participant consent, or explanation for lack thereof; other confidentiality and data security issues                                                                                                                              | 4                   |
| S10              | Data collection methods                                                                      | Types of data collected; details of data collection procedures including (as appropriate) start and stop dates of data collection and analysis, iterative process, triangulation of sources/methods, and modification of procedures in response to evolving study findings; rationale                 | 4-5                 |
| S11              | Data collection instruments and technologies                                                 | Description of instruments (e.g., interview guides, questionnaires) and devices (e.g., audio recorders) used for data collection; if/how the instrument(s) changed over the course of the study                                                                                                       | 4-5                 |
| S12              | Units of study                                                                               | Number and relevant characteristics of participants, documents, or events included in the study; level of participation (could be reported in results)                                                                                                                                                | NA                  |
| S13              | Data processing                                                                              | Methods for processing data prior to and during analysis, including transcription, data entry, data management and security, verification of data integrity, data coding, and anonymization/deidentification of excerpts                                                                              | 4-5                 |
| S14              | Data analysis                                                                                | Process by which inferences, themes, etc., were identified and developed, including the researchers involved in data analysis; usually references a specific paradigm or approach; rationale                                                                                                          | 4-5                 |
| S15              | Techniques to enhance trustworthiness                                                        | Techniques to enhance trustworthiness and credibility of data analysis (e.g., member checking, audit trail, triangulation); rationale                                                                                                                                                                 | 5                   |
| Results/findings |                                                                                              |                                                                                                                                                                                                                                                                                                       |                     |
| S16              | Synthesis and interpretation                                                                 | Main findings (e.g., interpretations, inferences, and themes); might include development of a theory or model, or integration with prior research or theory                                                                                                                                           | 5                   |
| S17              | Links to empirical data                                                                      | Evidence (e.g., quotes, field notes, text excerpts, photographs) to substantiate analytic findings                                                                                                                                                                                                    | 6-<br>appendix<br>3 |
| Discussion       |                                                                                              |                                                                                                                                                                                                                                                                                                       |                     |
| S18              | Integration with prior work, implications, transferability, and contribution(s) to the field | Short summary of main findings; explanation of how findings and conclusions connect to, support, elaborate on, or challenge conclusions of earlier scholarship; discussion of scope of application/generalizability; identification of unique contribution(s) to scholarship in a discipline or field | 11                  |
| S19              | Limitations                                                                                  | Trustworthiness and limitations of findings                                                                                                                                                                                                                                                           | 13                  |
| Other            |                                                                                              |                                                                                                                                                                                                                                                                                                       |                     |

1  
2  
3  
4  
5  
6  
7  
8  
9  
10  
11  
12  
13  
14  
15  
16  
17  
18  
19  
20  
21  
22  
23  
24  
25  
26  
27  
28  
29  
30  
31  
32  
33  
34  
35  
36  
37  
38  
39  
40  
41  
42  
43  
44  
45  
46  
47  
48  
49  
50  
51  
52  
53  
54  
55  
56  
57  
58  
59  
60

|     |                       |                                                                                                                |    |
|-----|-----------------------|----------------------------------------------------------------------------------------------------------------|----|
| S20 | Conflicts of interest | Potential sources of influence or perceived influence on study conduct and conclusions; how these were managed | 14 |
| S21 | Funding               | Sources of funding and other support; role of funders in data collection, interpretation, and reporting        | 15 |
|     |                       |                                                                                                                |    |

For peer review only



# BMJ Open

## Health risk communication and infodemic management in Iran: Development and validation of a conceptual framework

|                                 |                                                                                                                                                                                                                                                                                                                                                                                                                                                                                                                                                                                                                                                                                                                                                                                                                                                                                                                                                                                                                                                                                                                                                                                                                                                                                                                                                                                                                                                                                                    |
|---------------------------------|----------------------------------------------------------------------------------------------------------------------------------------------------------------------------------------------------------------------------------------------------------------------------------------------------------------------------------------------------------------------------------------------------------------------------------------------------------------------------------------------------------------------------------------------------------------------------------------------------------------------------------------------------------------------------------------------------------------------------------------------------------------------------------------------------------------------------------------------------------------------------------------------------------------------------------------------------------------------------------------------------------------------------------------------------------------------------------------------------------------------------------------------------------------------------------------------------------------------------------------------------------------------------------------------------------------------------------------------------------------------------------------------------------------------------------------------------------------------------------------------------|
| Journal:                        | <i>BMJ Open</i>                                                                                                                                                                                                                                                                                                                                                                                                                                                                                                                                                                                                                                                                                                                                                                                                                                                                                                                                                                                                                                                                                                                                                                                                                                                                                                                                                                                                                                                                                    |
| Manuscript ID                   | bmjopen-2023-072326.R1                                                                                                                                                                                                                                                                                                                                                                                                                                                                                                                                                                                                                                                                                                                                                                                                                                                                                                                                                                                                                                                                                                                                                                                                                                                                                                                                                                                                                                                                             |
| Article Type:                   | Original research                                                                                                                                                                                                                                                                                                                                                                                                                                                                                                                                                                                                                                                                                                                                                                                                                                                                                                                                                                                                                                                                                                                                                                                                                                                                                                                                                                                                                                                                                  |
| Date Submitted by the Author:   | 11-May-2023                                                                                                                                                                                                                                                                                                                                                                                                                                                                                                                                                                                                                                                                                                                                                                                                                                                                                                                                                                                                                                                                                                                                                                                                                                                                                                                                                                                                                                                                                        |
| Complete List of Authors:       | <p>Bazrafshan, Azam; Kerman University of Medical Sciences, HIV/STI Surveillance Research Center, and WHO Collaborative Center for HIV Surveillance, Institute for Futures Studies in Health, Sadeghi, Azadeh; Kerman University of Medical Sciences, HIV/STI Surveillance Research Center, and WHO Collaborative Center for HIV Surveillance, Institute for Futures Studies in Health,; Kerman University of Medical Sciences, Deputy of Health, Department of Communicable Diseases</p> <p>Bazrafshan, Maliheh Sadat; Kerman University of Medical Sciences, HIV/STI Surveillance Research Center, and WHO Collaborative Center for HIV Surveillance, Institute for Futures Studies in Health, Mirzaie, Hossein; Kerman University of Medical Sciences, HIV/STI Surveillance Research Center, and WHO Collaborative Center for HIV Surveillance, Institute for Futures Studies in Health, Shafiee, Mehdi; Kerman University of Medical Sciences, HIV/STI Surveillance Research Center, and WHO Collaborative Center for HIV Surveillance, Institute for Futures Studies in Health,; Kerman University of Medical Sciences, Deputy of Health, Department of Communicable Diseases</p> <p>Geerts, Jaason; Canadian College of Health Leaders; City University of London, Bayes Business School</p> <p>Sharifi, Hamid; Kerman University of Medical Sciences, HIV/STI Surveillance Research Center, and WHO Collaborating Center for HIV Surveillance, Institute for Futures Studies in Health,</p> |
| <b>Primary Subject Heading</b>: | Public health                                                                                                                                                                                                                                                                                                                                                                                                                                                                                                                                                                                                                                                                                                                                                                                                                                                                                                                                                                                                                                                                                                                                                                                                                                                                                                                                                                                                                                                                                      |
| Secondary Subject Heading:      | Health policy                                                                                                                                                                                                                                                                                                                                                                                                                                                                                                                                                                                                                                                                                                                                                                                                                                                                                                                                                                                                                                                                                                                                                                                                                                                                                                                                                                                                                                                                                      |
| Keywords:                       | COVID-19, Health policy < HEALTH SERVICES ADMINISTRATION & MANAGEMENT, INFECTIOUS DISEASES                                                                                                                                                                                                                                                                                                                                                                                                                                                                                                                                                                                                                                                                                                                                                                                                                                                                                                                                                                                                                                                                                                                                                                                                                                                                                                                                                                                                         |
|                                 |                                                                                                                                                                                                                                                                                                                                                                                                                                                                                                                                                                                                                                                                                                                                                                                                                                                                                                                                                                                                                                                                                                                                                                                                                                                                                                                                                                                                                                                                                                    |

SCHOLARONE™  
Manuscripts

1  
2  
3  
4  
5  
6  
7  
8  
9  
10  
11  
12  
13  
14  
15  
16  
17  
18  
19  
20  
21  
22  
23  
24  
25  
26  
27  
28  
29  
30  
31  
32  
33  
34  
35  
36  
37  
38  
39  
40  
41  
42  
43  
44  
45  
46  
47  
48  
49  
50  
51  
52  
53  
54  
55  
56  
57  
58  
59  
60

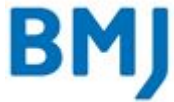

I, the Submitting Author has the right to grant and does grant on behalf of all authors of the Work (as defined in the below author licence), an exclusive licence and/or a non-exclusive licence for contributions from authors who are: i) UK Crown employees; ii) where BMJ has agreed a CC-BY licence shall apply, and/or iii) in accordance with the terms applicable for US Federal Government officers or employees acting as part of their official duties; on a worldwide, perpetual, irrevocable, royalty-free basis to BMJ Publishing Group Ltd ("BMJ") its licensees and where the relevant Journal is co-owned by BMJ to the co-owners of the Journal, to publish the Work in this journal and any other BMJ products and to exploit all rights, as set out in our [licence](#).

The Submitting Author accepts and understands that any supply made under these terms is made by BMJ to the Submitting Author unless you are acting as an employee on behalf of your employer or a postgraduate student of an affiliated institution which is paying any applicable article publishing charge ("APC") for Open Access articles. Where the Submitting Author wishes to make the Work available on an Open Access basis (and intends to pay the relevant APC), the terms of reuse of such Open Access shall be governed by a Creative Commons licence – details of these licences and which [Creative Commons](#) licence will apply to this Work are set out in our licence referred to above.

Other than as permitted in any relevant BMJ Author's Self Archiving Policies, I confirm this Work has not been accepted for publication elsewhere, is not being considered for publication elsewhere and does not duplicate material already published. I confirm all authors consent to publication of this Work and authorise the granting of this licence.

## Health risk communication and infodemic management in Iran: development and validation of a conceptual framework

**Authors:** Azam Bazrafshan<sup>1</sup>, Azadeh Sadeghi<sup>1,2</sup>, Maliheh Sadat Bazrafshan<sup>1</sup>, Hossein Mirzaie<sup>1</sup>, Mehdi Shafiee<sup>1,2</sup>, Jaason M. Geerts<sup>3,4</sup>, Hamid Sharifi<sup>1\*</sup>

1 HIV/STI Surveillance Research Center, and WHO Collaborative Center for HIV Surveillance, Kerman University of Medical Sciences

2 Department of Communicable Diseases, Deputy of Health, Kerman University of Medical Sciences, Kerman, Iran

3 Honorary Visiting Fellow, Bayes Business School, University of London, UK.

4 Director of Research and Leadership Development, The Canadian College of Health Leaders, Ottawa, Canada.

\*Corresponding author: Hamid Sharifi (Sharifihami@gmail.com)

### Abstract

**Objective:** the COVID-19 pandemic exposed significant gaps in Iran's health systems. The accompanying infodemic undermined policy responses, amplified distrust in government, and reduced adherence to public health recommendations among the Iranian population. This study aimed to develop a conceptual framework for health risk communication and infodemic management (RCIM) during epidemics and health emergencies in Iran that could have potential applications in other contexts.

**Design:** this study was designed in two phases. Phase 1 involved semi-structured qualitative interviews with key informants to explore effective RCIM strategies across public health settings in Iran and to develop a conceptual framework. Phase 2 involved revising the framework based on feedback from an online expert panel regarding its comprehensiveness and validity.

**Setting:** provincial/national public health settings in Iran.

**Participants:** twenty key informants from provincial and national public health authorities who contributed to COVID-19 response programs participated in interviews. Nine experts from diverse academic disciplines, provincial and national settings, and geographical locations participated in an online expert panel.

**Results:** the conceptual model was created based on qualitative interviews and expert panel discussions and was structured according to four pillars of the World Health Organization (WHO) health system framework: leadership and governance, information, health workforce, and financial resources, along with media and community. Leadership and governance, including trustworthy leaders, were recommended as the foundation for developing RCIM in Iran. Developing an official strategy with information infrastructures, including high-quality surveillance systems, identified personnel and training for specialists among the health workforce, financial resources, communication channels, and community engagement, were recognised as other dimensions for developing health risk communication in Iran.

**Conclusion:** the proposed framework represents a step toward establishing a national health risk communication strategy in Iran. Further validation of the conceptual framework and experiments on how it could potentially influence policy and practice are recommended.

## Keywords

risk communication, leadership, infodemic, COVID-19, emergency preparedness, crisis response

## Strengths and limitations of this study

- This study consolidates insights from the field experiences of public health professionals across provincial and national settings in risk communication and infodemic management (RCIM) during the COVID-19 pandemic in Iran. Investigating the experiences and perceptions of academics, health professionals, and policy-makers enhances the validity of the results by including diverse perspectives on the topic of RCIM, and strengthens the proposed framework's credibility by providing a comprehensive understanding of its applicability in provincial and national public health settings.
- This study presents a novel conceptual framework, validated through full consensus by a panel of experts, for risk communication and infodemic management during epidemics and health emergencies in Iran.
- The qualitative nature of our study and the focus on one country may limit the perceived validity, however, involving two phases of diverse experts increases the potential relevance of the framework to other contexts

## Introduction

The COVID-19 pandemic has changed our world, having affected every sector significantly, including health, education, economic, social, cultural, and informational (1). One of the social repercussions of the pandemic has been the constant spread through various media of overwhelming volumes of information, particularly concerning health, public health, government directives, and related issues (1). Much of this has been "misinformation" and "disinformation", both of which refer to incorrect or misleading content, the difference being the intentionality of those engaging in disinformation to cause harm, whereas misinformation is non-malicious but still potentially dangerous (1). Sources of mis- and disinformation range from non-stringently reviewed rapid academic publications with non-credible or flawed methodologies - and thereby dubious conclusions (misinformation), to "fake news" through anonymous social media posts and intentionally misleading messaging by government officials (disinformation) (1).

The COVID-19 pandemic and its accompanying infodemic have globally impacted individual and population health (2,3). In Iran, there is evidence, though limited, that the mis- and disinformation – the infodemic - spread widely through social media during the pandemic was associated with significant COVID-19 vaccine hesitancy rates (2,3), substantial uptake of traditional and complementary medicine products (4), and poor adherence to preventive measures, such as masking, in the general population (5). This escalation reinforces the importance of infodemic management in Iran.

False information, combining accidental and intentional, has contributed significantly to misguided health policies and to a host of deleterious consequences for individual and population health (6,7). This phenomenon is called an "infodemic". The World Health Organization (WHO) defines an infodemic as, "the widespread distribution of false or misleading information in digital and physical environments during a disease outbreak" (8). Without robust systemic safeguards in place, an infodemic can make communities, jurisdictions, and whole populations more vulnerable to disease infection and their side effects, as well as to other related harms (9). Information overload, including the infodemic, during the COVID-19 pandemic has represented a parallel pandemic whose transmission rate is much faster than the disease itself, since rampant erroneous and prejudicial information can trigger the spread of wild

1  
2  
3 and accelerated waves of fear and defiance in the general population (10). In Iran, for example, there is  
4 evidence, though limited, that the infodemic spread widely through social media during the pandemic  
5 was associated with significant COVID-19 vaccine hesitancy rates (2, 3), substantial uptake of traditional  
6 and complementary medicine products (4), and poor adherence to preventive measures, such as  
7 masking, in the general population (5). This escalation reinforces the importance of infodemic  
8 management in Iran.  
9  
10

11  
12 Before the Internet, one of the main reasons for deaths during epidemics and pandemics was the lack  
13 of sufficient information on the prevention, care, and treatment of the disease (11).  
14  
15

16 But as technology advances, during health emergencies, the profusion of information, which is often  
17 conflicting, increases, primarily through social and digital media and instant messaging (12). The  
18 potential consequences of this profusion can intensify, particularly when people are in lockdown or  
19 isolation (12). Infodemics can severely change a pandemic's course by undermining public health and  
20 government recommendations and by diminishing population and community adherence to public  
21 health interventions such as, masking, social distancing, and vaccination. In particular, the impact of the  
22 infodemic on vaccination is critical because it is key to re-establishing pre-pandemic normalcy (13, 14).  
23 Economically disadvantaged countries are at higher risk of infodemics than developed countries, due to  
24 a range of inequalities (15). Lower rates of health literacy, limited access to reliable health information,  
25 and minimal public trust in public health authorities (15) can make people from underdeveloped and  
26 developing countries more susceptible to fake news and misinformation (13, 14). This vulnerability is  
27 compounded by further inequalities in terms of comparatively limited healthcare infrastructure and  
28 reduced access to healthcare facilities and public health professionals, which make people from these  
29 countries more prone to sporadic and ill-advised health and public health behaviours (16). In this  
30 context, the spread of misinformation and disinformation as part of the infodemic can pose a greater  
31 threat to populations in underdeveloped and developing countries during epidemics and health  
32 emergencies (17) by negatively influencing public risk perceptions and by undermining evidence-based  
33 policy creation and national and regional emergency responses (18-20). These hindrances can increase  
34 the spread and burden of the pandemic and widen global health disparities.  
35  
36  
37  
38  
39  
40  
41

42 Infodemics have become a global phenomenon, impacting citizens in every country (21, 22). Addressing  
43 them is a new challenge and priority in managing and responding to epidemics and health emergencies.  
44 To understand and counter the rapidly changing nature of the COVID-19 infodemic and to mitigate its  
45 negative effects, such as the further spread of misinformation, several novel strategies and initiatives  
46 have been established across public health settings globally. The WHO has been widely respected for  
47 developing highly credible guidelines and initiatives to combat misinformation and infodemic  
48 management across the world (23). From early in the COVID-19 response, the WHO began to develop  
49 international strategies for infodemic management, in cooperation with other organisations, including  
50 the US Center for Disease Control and Prevention (CDC) and the Africa Centre for Disease Control and  
51 Prevention. To track and address misinformation surrounding COVID-19 and HIV, UNAIDS and the Africa  
52 CDC have been operating a rumour management system—software that uses machine learning,  
53 combined with human expertise, to collect and analyse rumour data from open-source traditional  
54 media (web-based, news broadcasts), as well as social media (Facebook, Twitter, WhatsApp). The  
55 system enables the identification of false and misleading information related to COVID-19 and HIV (23).  
56 In addition, the WHO developed a framework for infodemic management through crowd-sourcing and  
57  
58  
59  
60

1  
2  
3 online consultation with a wide range of global public health professionals (24). Ghana Health Services  
4 (GHS), together with the United Nations International Children's Emergency Fund (UNICEF) Country  
5 Office, have developed a systematic process that effectively identifies, analyses, and responds to  
6 COVID-19 and vaccine-related misinformation in Ghana (25). These initiatives are helpful foundations  
7 for further infodemic management strategies.  
8  
9

10  
11 Risk communication and infodemic management (RCIM) are the core of risk management and effective  
12 responses to epidemics and health emergencies (26). According to Eysenbach (2020), there are four  
13 pillars of infodemic management: information monitoring, building health and e-health literacy in the  
14 general population, consolidating and disseminating credible information, including by accelerating the  
15 academic peer-review process, to ensure accurate and timely knowledge translation, and minimising  
16 factors, such as political or commercial agendas, that can distort or distract from evidence-based  
17 guidance or strategies (27). Combating mis- or disinformation for populations is as critical as ensuring  
18 much-needed medical equipment and supplies for health workers are readily available (28). In  
19 underdeveloped and developing countries, given their existing health information inequalities and  
20 public health vulnerabilities, customized RCIM approaches are needed to combat infodemics and to  
21 reduce their effects on population health (29). In particular, engagement and collaboration with local  
22 communities and leaders and stricter public health regulations are necessary (29). While some contexts  
23 may be more susceptible to the dangerous potential impacts of mis- and disinformation, none is  
24 immune, and the consequences of failing to tackle it directly and strategically can be dire.  
25  
26  
27  
28  
29

30  
31 The purpose of this study was to build on and extend previous conceptualisations of RCIM capacity  
32 building by creating a conceptual framework of RCIM in Iran. To achieve this, we applied a systems  
33 thinking lens, since the pandemic demonstrated that not only can health emergencies affect all people  
34 and sectors, but that addressing infodemics requires more than just public health messaging. Along  
35 with potential benefits for other sectors, robust national and regional RCIMs can have a significant  
36 positive impact on health systems, those who bear the brunt of health emergencies (30). The WHO  
37 describes a health system as a set of interconnected building blocks that are essential to health system  
38 functioning. The blocks are: service delivery, health workforce, health information systems, access to  
39 essential medicines, financing, and leadership/governance, with the latter being central to all (30). It is  
40 essential that each of these interconnected elements are addressed concomitantly in response to  
41 changing population health needs and inequalities, and to epidemics and health emergencies (30). This  
42 multifaceted understanding of health systems, along with considerations for other related sectors, is  
43 vital to effective RCIM strategies, since mis- and disinformation can affect those in all aspects of society.  
44 The nature of health emergencies requires that policy and communications strategy recommendations  
45 should be gathered from a diverse group of actors with relevant RCIM expertise, including researchers,  
46 educators, advocates, practitioners, funders, private sector representatives, community  
47 representatives, government officials, policymakers, and various trusted international experts and  
48 representatives. Leaders from across sectors should also collaborate with public health and with each  
49 other to integrate RCIM strategies effectively to improve the health of all people and communities (31,  
50 32). Applying these diverse perspectives and the systems thinking approach can enhance RCIM policies,  
51 strategies, and activities nationally, regionally, and locally and can lead to improved relevant health  
52 outcomes during epidemics and health emergencies (33).  
53  
54  
55  
56  
57  
58  
59  
60



1  
2  
3 Drawing on the importance of this approach, we involved the perspectives of a diverse set of experts in  
4 our study to enhance the quality and reliability of the conceptual framework (34, 35). Our intention was  
5 for the framework to have the potential to be applied to build RCIM capacity effectively in Iran and in  
6 other underdeveloped and developing countries and beyond.  
7  
8

## 9 **Methods**

10 This sequential, mixed-methods exploratory study was conducted in two phases from October to  
11 December 2022. Phase 1 involved semi-structured interviews with key informants from provincial and  
12 national public health authorities to inform the creation of an initial framework of key RCIM  
13 components across settings. Phase 2 involved an online panel of experts from relevant scientific  
14 domains to validate the conceptual framework's validity, credibility, and transformability (34, 35). We  
15 then revised the framework based on the panel's feedback (Figure 1). This study followed the Standards  
16 for Reporting Qualitative Research (SRQR) checklist (36).  
17  
18  
19

### 20 **Phase 1: semi-structured interviews**

21  
22 Phase 1 involved semi-structured interviews with a purposive sample of 20 Iranian public health  
23 professionals across provincial and national health authorities. Study participants included  
24 stakeholders, academics, decision-makers, and leaders with expertise in community health,  
25 epidemiology, public health, social medicine, health communication, and sociology. Participants were  
26 from eight pre-specified provinces: Kerman, Tehran, Fars, Isfahan, Mazandaran, West-Azerbaijan,  
27 Kermanshah, and Sistan va Baloochestan. These provinces were initially selected to involve a  
28 representative sample of the Iranian population with diverse social, geographical, and cultural  
29 characteristics. Inclusion criteria were: 1) having at least one year of experience in either COVID-19  
30 prevention and control programs or decision-making in provincial or national public health settings, and  
31 2) willingness to participate in the study.  
32  
33  
34  
35

36  
37 An interview guide was developed according to previous studies (Appendix 1). The interview guide  
38 focused on the processes, infrastructures, challenges encountered, and best practices relevant to RCIM  
39 during the COVID-19 pandemic in Iran. The interview guide was assessed beforehand by two expert  
40 reviewers. It was subsequently pre-tested with three target population members before the  
41 implementation.  
42  
43

44 The interviews followed a semi-structured design, allowing for variations of the order of the questions  
45 and follow-up questions based on participant responses. The objectives and the activities that were  
46 involved in the study were explained to the participants. The principal investigator's contact details  
47 were provided, and participants' confidentiality was guaranteed. Written consent was sought before  
48 the interview, and the participants were asked to email the completed form to the principal  
49 investigator (Appendix 2). An experienced interviewer with a background in qualitative research and  
50 interviewing expertise conducted the interviews in the Farsi language. Due to COVID-19 social  
51 distancing, all interviews were conducted by telephone, audio-recorded, and transcribed verbatim.  
52 Interviews ranged between 20–55 minutes (mean = 34 minutes). Interviews lasted until the researchers  
53 realised they had reached content saturation.  
54  
55  
56

57  
58 To analyse the interview data, we applied Braun and Clarke's framework for thematic analysis of  
59 qualitative data (37) to the interview transcripts. The authors define thematic analysis as, "the process  
60



of identifying patterns or themes within qualitative data” (p. 78). Their framework involves six steps: becoming familiar with the data, generating initial codes, searching for themes, reviewing themes, defining themes, and writing up. We used MAXQDA 12 (VERBI GmbH, USA) for manual coding and content analysis.

Based on the themes identified from the qualitative interviews, we created an initial set of 33 key RCIM strategies and organized them according to four of the pillars of the WHO model of the health systems, along with media and community (30). This initial set of components served as the basis for discussion with, and validation by, the expert panel in Phase 2 and consequently, the conceptual model.

### **Phase 2: expert panel validation**

Phase 2 involved a group of nine experts selected through purposive sampling to validate and prioritise key components of the initial RCIM model and to evaluate its completeness and validity (34, 35). The panel included a diverse set of stakeholders, academics, decision-makers, leaders from the various communities, and national public health leaders. The inclusion criteria for this phase were: 1) having at least three years of professional experience or established research expertise in the fields of public health, epidemiology, crisis management, infodemiology, social media studies, or health communication; and 2) willingness to participate in the study. Potential panel members (n = 9) were identified through their academic or professional roles in health risk communication or risk management activities across provincial or national health authorities during the COVID-19 pandemic. Prospective contributors were given a short statement of the study’s purpose and design and were invited by email to participate in the panel discussion. During the discussion, panellists engaged based on their assessments of the initial conceptual model and suggested additions, deletions, and modifications, with the aim of informing a highly complete and credible model of essential components of an RCIM model for the country. As mentioned previously, this validation by experts was also intended to augment the quality, reliability, and validity of the model (34, 35).

Following this phase, several revisions were made to the original conceptual model, but no factor was deemed required for exclusion. The required level of consensus for each component in this phase was a minimum of 75% agreement.

### **Patient and Public Involvement Statement**

No patients or community members were involved in this study.

## **Results**

### **Phase 1: semi-structured interviews**

#### **Participants**

Most participants were men (n=19, 95%), aged 51-60 years old (n=11, 55%), from medical and public health disciplines (n=17, 85%), who work as a provincial or national health officer (n=14, 70%). Participants were mostly from Tehran (n=7, 35%) and Kerman provinces (n=5, 25%) (Table 1).

**Table 1:** Demographic characteristics of the participants in the interviews (Phase 1)

| Demographic characteristics                | Frequency (%) |
|--------------------------------------------|---------------|
| <b>Residence at the time of interviews</b> |               |
| Tehran                                     | 7(35)         |
| Kerman                                     | 5 (25)        |
| Fars                                       | 2 (10)        |
| Isfahan                                    | 2 (10)        |
| Kermanshah                                 | 1 (5)         |
| Mazandaran                                 | 1 (5)         |
| Sistan va Baluchestan                      | 1 (5)         |
| West Azerbaijan                            | 1 (5)         |
| <b>Age</b>                                 |               |
| 40-49                                      | 6 (30)        |
| 50-59                                      | 11 (55)       |
| 60≥                                        | 3 (15)        |
| <b>Gender</b>                              |               |
| Men                                        | 19 (95)       |
| Women                                      | 1 (5)         |
| <b>Academic Discipline</b>                 |               |
| Epidemiology                               | 6 (30)        |
| General medicine                           | 4 (20)        |
| Sociology                                  | 3 (15)        |
| Health policy                              | 2 (10)        |
| Infectious disease                         | 2 (10)        |
| Social medicine                            | 2 (10)        |
| Health education & promotion               | 1 (5)         |

The analysis of the qualitative data collected during the key informant interviews revealed 948 open codes and 84 sub-themes. Sub-themes were subsequently classified into 33 components (Appendix 3).

The next step involved organising these components according to six categories representing a combination of the WHO model (24) and key aspects of the Iranian health system: leadership and governance, information, health workforce, financial resources, media, and community. The results formed the initial RCIM conceptual model.

### **Theme 1: Leadership and Governance**

Leadership and governance are at the heart of the WHO model of health systems (30) and Dr. Tedros Ghebreyesus, Director-General of the WHO, said in the early months of the pandemic, "The greatest threat we face now is not the virus itself, it's the lack of global solidarity and global leadership" (38). Similarly, in an international study of crisis leadership featuring 32 co-authors from 17 countries, Geerts et al. (2021) highlighted that effective leadership, trust in leaders through transparent decision-making, communication, and accountability are vital to successful public health strategies (34, 35).

These examples reinforce the finding in our study that every respondent mentioned leadership and governance as essential foundations for the RCIM model. Seven respondents emphasised transparency in decision-making, effective communication, and accountability as important characteristics of effective leadership and governance. According to these respondents, a lack of transparency and

1  
2  
3 accountability among Iranian health officials and government authorities were among the country's  
4 substantial weaknesses in risk communication and had adverse consequences. Thirteen respondents  
5 suggested that senior public health officials intentionally caused non-transparent information  
6 communication during the COVID-19 pandemic, motivated by financial and other competing interests,  
7 which, they suggested, eroded public trust significantly. Similarly, regarding sources of false messaging,  
8 seven respondents indicated that pharmaceutical companies were a major source of spreading  
9 misinformation during the pandemic. These respondents suggested that public health officials to allow  
10 their financial and competing interests, including those related to pharmaceutical companies, to deter  
11 them from spreading credible information about the efficacy of some new and underdeveloped  
12 medications and vaccines. One respondent expanded a perception that many health officials were  
13 among shareholders of the pharmaceutical industry, they advertised some drugs or public health  
14 products and subsequently caused a fake and unrealistic demand among the population.  
15  
16  
17  
18  
19

20 Almost all respondents (n =18) emphasised that the health system needs a robust risk communication  
21 strategy and increased infodemic management capacity by developing infrastructures for monitoring  
22 the public's risk perception, knowledge and attitudes, communicating with the public, and providing  
23 clear guidance through various media based on the best available science. Increased RCIM capacity  
24 would enable early detection of outbreaks of potentially harmful mis- and disinformation, and quick  
25 responses to counter falsehoods with facts or other reliable information in a targeted way for each  
26 audience. One respondent suggested that building capacity should involve designing an infodemic  
27 management system that defines national and provincial responsibilities based on lessons learned from  
28 credible global guidelines, national and regional successful strategies, challenges, and failures, as well  
29 as leading practices, locally and elsewhere. This respondent added that the system should include a  
30 national independent core rapid response team with clear roles, protocols, and accountabilities to  
31 collaborate with communities to screen and identify their needs, concerns, and misinformation sources,  
32 to lead quick responses the potential risks, and to prevent or mitigate the viral spread of mis- and  
33 disinformation across the communities. Similarly, six respondents proposed developing, implementing,  
34 evaluating, and revising communication policies and strategies to confront potential risks. According to  
35 these respondents, the lack of national and provincial policies and programs for RCIM severely inhibited  
36 the national COVID-19 control and management efforts. Four respondents argued that the  
37 government's poor management of the COVID-19 infodemic, poor communication with the public and  
38 other stakeholders, and a lack of national and provincial strategies to address misinformation were  
39 major shortcomings of risk communication and infodemic management in Iran.  
40  
41  
42  
43  
44  
45  
46

47 To optimize RCIM strategies, it is crucial to involve representatives from multiple sectors and the  
48 community representatives. Eleven respondents indicated that top-down public health initiatives that  
49 lacked community-based customisation and approaches were among the major barriers to acceptance  
50 of COVID-19 prevention and control interventions during the pandemic. Multi-sector and community  
51 involvement could also potentially improve community members' motivation to participate actively in  
52 information communication and management of infodemics. For example, one respondent described  
53 how social influencers in community-based approaches, such as that in Safiran-e-Salamat, Tehran,  
54 served as facilitators for effective risk communication and infodemic management across provincial  
55 settings.  
56  
57  
58  
59  
60

1  
2  
3 Ineffective use of institutional and provincial infrastructures and capacities and lack of crowdsourcing  
4 were cited by four participants as major barriers to effective infodemic management during the COVID-  
5 19 pandemic. These respondents elaborated that medical universities and faculty within the provinces  
6 were isolated from the national health authorities and not supported by the Ministry of Health in  
7 planning and decision-making. These two respondents recommended establishing official networks of  
8 experts in diverse areas and practitioners to share experiences, challenges, and best practices of  
9 information communication during the potential risks and increase capacity.  
10  
11

12  
13 Along with trustworthy public health guidance and recommendations, two respondents stated that  
14 providing all people with tools for filtering, assessing, and fact-checking information is essential to  
15 combat misinformation during the pandemic and health emergencies. Five respondents believed that  
16 using a well-known and reliable communication channel and technology-based interventions would  
17 maximise the spread of valid information and impact communication efforts and strategies.  
18  
19

## 20 **Theme 2: Information**

21 Developing a network platform to systematically collect, analyse, and interpret epidemiologic data from  
22 the community and quickly disseminate the key findings was considered an important characteristic of  
23 risk communication by fourteen respondents. These respondents emphasised that a lack of access to  
24 real-time, valid, and high-quality data about the incidence, mortality, and burden of the COVID-19  
25 disease in different provinces intensified the potential risk and spread of misinformation among the  
26 population.  
27  
28

29  
30 Similarly, seven respondents indicated that a lack of access to high-quality surveillance data for  
31 research activities and to inform responses to potential and emergent challenges reduced the reliability  
32 of information and recommendations and transparency of government decisions. Consequently, it  
33 raised dramatic social concerns about the government's ability to estimate the spread of the disease  
34 and to anticipate and evaluate the effect of specific policies on population health.  
35  
36

37  
38 In addition to data quality issues, two respondents suggested that the lack of substantial resources to  
39 handle the multiplication of data sources and information producers, to monitor disease trends  
40 regularly, and to appraise the quality of data sources were major barriers to the effective use of  
41 surveillance data for decision-making during the pandemic.  
42  
43

44  
45 One respondent stated that some politicians, health officials, and media misinterpreted and selectively  
46 reported data according to their own financial, commercial, and political interests, which he considered  
47 a major source of misinformation during the pandemic. Two respondents argued that effective  
48 knowledge translation of high-quality data is required to minimise the spread of misinformation across  
49 different sectors and communities, since people's political, commercial, and financial interests can lead  
50 them to distort scientific messages.  
51  
52

53  
54 Finally, three respondents reported that these data issues contributed to a lack of evidence-based  
55 policies and practices, which severely inhibited effective risk communication and infodemic  
56 management.  
57  
58  
59  
60

### Theme 3: Health workforce

All respondents highlighted the need for well-trained specialists in various organisations with a mix of skills that can contribute to risk communication and infodemic management activities, as well as additional training for all health workers.

Six respondents promoted the benefits of involving public health agencies, epidemiologists, data scientists, and sociologists who have unique expertise and credibility to guide policies, strategies, and risk communication and infodemic management, in collaboration with health workers. However, all respondents agreed that the Iranian scientists and experts have not helped substantially to prevent misinformation and to mitigate the effects of the infodemic. Further, three respondents suggested that, in some cases, scientists and academic experts in infodemic management were considered sources of misinformation, seen as contributing to the infodemic trends by publishing low-quality scientific papers and providing non-credible, sensational, or exaggerated information about new treatments.

To gather relevant data and to disseminate evidence-based guidance, twelve respondents highlighted the need to involve professional councils, NGOs, interested experts, and health volunteers as additional workforce sources to improve the speed and effectiveness of the response to the infodemic.

Three respondents identified a key gap in RCIM: a lack of qualified and well-trained spokespersons in public health and health organisations, which, they suggest, greatly diminished the quality of risk communication activities during the pandemic. Four respondents referenced a range of competencies necessary to improve the quality of the health workforce education and practice, which can be used to select potential candidates for RCIM roles and to design educational courses and curricula to enhance their ability to support health emergency response effectively.

### Theme 4: Financing

Three respondents highlighted the importance of effective financial resource allocation to risk communication and infodemic management to support data collection and analysis and communication strategies. One respondent argued that multi-sector collaborations could reduce the risk of underfunding communication responses. Using technology-based interventions, such as text-messaging approaches, could improve the cost-effectiveness of communication strategies.

### Theme 5: Media

All respondents mentioned characteristics related to media. Two respondents believed that given the broad coverage and penetration of radio and television (TV) as dominant communication channels in most parts of the country, involvement of trustworthy spokespersons in, and collaboration with, mass media, could improve the effectiveness of risk communication strategies. However, the respondents elaborated that the weak contribution of these media in RCIM was an obstacle to preventing misinformation. Even worse, nine respondents argued that TV and other mass media actually contributed to the COVID-19 infodemic. According to these respondents, broadcasting news reports that included misleading and low-value information, interviews with non-experts, and flagrant criticisms or debates about the performance of public health agencies reduced public trust and prompted many people and communities to rely more on informal and social media channels.

Three respondents added the need to improve government and health authorities' websites to disseminate real-time and high-quality information, since many consider them the source of credible

1  
2  
3 information. Additionally, six respondents advocated social media platforms as important  
4 communication channels for most communities to aid the acceptance of public health interventions.  
5 Three respondents elaborated that reduced public trust in formal and government communication  
6 channels caused many people to rely instead on social media platforms, viewing them as more  
7 trustworthy. For example, according to two respondents, the dissemination of valid and high-quality  
8 data through social media channels influenced the impact of local interventions and improved  
9 vaccination coverage for vulnerable and ethnic populations, particularly in Sistan-va-Baluchestan and  
10 West Azerbaijan. These respondents explained that, due to higher accessibility, social media platforms  
11 were highly utilised by younger adults and geographically distanced locations and, therefore, effective  
12 in improving the speed and effectiveness of interventions among members of these populations.  
13  
14  
15

### 16 **Theme 6: Community**

17 Eight respondents reinforced the importance of involving the community in risk communication and  
18 infodemic management in two ways. First, by understanding their diverse demographic, social,  
19 economic, and cultural compositions and by identifying their information needs, preferred media, and  
20 key influencers. Second, by listening to their concerns, sharing key data and evidence-based  
21 recommendations with them, and incorporating their input transparently into important, relevant  
22 decisions. However, four respondents suggested that the lack of community-centred approaches  
23 reduced the effectiveness of risk communication efforts during the COVID-19 pandemic in most Iranian  
24 provincial settings. Three respondents recommended priority training in critical thinking, media, and  
25 health literacy for community leaders in risk communication and infodemic management to improve  
26 their engagement, active contribution, and effectiveness. According to these respondents, well-  
27 informed, engaged, and enabled communities can minimise misinformation and infodemic  
28 consequences and develop their own local solutions. One respondent expressed that this kind of  
29 respectful, reciprocal relationship with communities could rebuild and maintain public trust in public  
30 health agencies, health professionals, and government authorities and could also maximise social  
31 cohesion and local capacity successfully respond to potential risks during the crisis.  
32  
33  
34  
35  
36  
37

### 38 **Phase 2: expert panel validation**

39 In this phase, the completeness and trustworthiness of the proposed conceptual model of RCIM in Iran  
40 was discussed by the online expert panel until consensus was achieved by all panel members (100%  
41 agreement) (Figure 1).  
42  
43

44 Figure 1: a conceptual model of components and infrastructures of health risk  
45 communication and infodemic management system in Iran  
46  
47

### 48 **Discussion**

49 This study, conducted during the COVID-19 pandemic, was inspired by an awareness of two aspects of  
50 the global experience. The first is the extent to which infodemics can influence the course of large-scale  
51 health emergencies, given the global impact that the COVID-19 infodemic has had on individual and  
52 population health (2, 3). The term “infodemic” refers to the profusion of recurring waves of information  
53 of overwhelming volume and predominantly unclear and/or mixed credibility, including disinformation,  
54 messaging intended to deceive. Infodemics can erode the quality and effectiveness of policy and  
55 strategy decisions. They can also intensify community and population-level distrust in government and  
56 public health officials and experts, including their recommendations, which can drastically undermine  
57 national and local efforts to effectively mitigate the spread of the disease. As people’s faith in official  
58  
59  
60



1  
2  
3 sources diminishes, the likelihood of them being influenced by alternatives increases, and the escalation  
4 of rumours and fear exacerbates. Broadcasts of incorrect information through TV, radio, newspapers,  
5 and other mainstream and social media, and even through academic publications, can contribute to  
6 widespread non-adherence to public health directives, thereby perpetuating the spread, impact, and  
7 burden of a pandemic.  
8  
9

10  
11 Infodemics can have increasingly devastating effects in economically disadvantaged countries, due to a  
12 wide range of inequalities (15), which can make people local populations more susceptible to fake news  
13 and misinformation (13, 14). This vulnerability is compounded by further inequalities in terms of  
14 healthcare infrastructure, access to healthcare facilities, and health professionals (16). Evidence  
15 suggests that, in Iran, the infodemic spread, largely through social media, contributed to several adverse  
16 outcomes in the general population (32). The speed, scale, and potential lethal consequences of  
17 infodemics are why they are considered parallel pandemics, which require a dedicated, strategic,  
18 expertise-informed response to allay.  
19  
20  
21

22  
23 The second inspiration for the study was an appreciation for the vital mitigating role that effective risk  
24 communication information management (RCIM) can play in pandemic and infodemic response.  
25 Understanding the sources of mis- and disinformation and rapid, effective government and public  
26 health response, in collaboration with multi-sector and community leaders, to evolving risks, along with  
27 targeted strategies, can mitigate potential negative ramifications.  
28  
29

30  
31 The purpose of this research was to support increased national and local RCIM capacity in Iran and  
32 beyond by creating a unique conceptual model of evidence-, expert-, and experience-informed  
33 strategies for RCIM during epidemics and health emergencies. To create the model, we applied a  
34 systems thinking lens, since infodemics and their effects reside within multi-sectoral complex systems  
35 involving interactions and actors from all aspects of society. This perspective considers how to most  
36 effectively engage with potential audiences and diverse stakeholders, including the community,  
37 scientists and experts, government and public health officials, health workforce, pharmaceutical  
38 industries (private sector), and others, through physical and virtual communication channels (Figure 2).  
39 This comprehensive approach can enhance the potential for sectoral and provincial health authorities to  
40 improve RCIM activities and relevant health outcomes during epidemics and health emergencies. Given  
41 this perspective, following leading international pandemic research (27), we gathered two stages of  
42 input and validation from diverse groups of those with expertise and experience in public health and  
43 various related sectors and disciplines.  
44  
45  
46  
47  
48  
49

50 Figure 2 Components of the COVID-19 risk communication and infodemic management in Iran, source:  
51 own production  
52

53  
54 The model presented here is organised according to four of the pillars of the WHO model of the health  
55 systems, along with media and community (30), and it is reinforced by the full consensus of an expert  
56 panel in terms of its quality, completeness, and validity. While the model was developed for the Iranian  
57 context, the intention was for it to have potential application in other contexts to decrease the spread  
58 and burden of future health emergencies and to minimise global health disparities.  
59  
60



1  
2  
3 What follows are some insights on, and priority points for, effective RCIM that emerged from the  
4 qualitative interviews and expert panel discussions.  
5  
6

7 Our findings support the vital importance and potential impact of establishing a robust, integrated,  
8 evidence-informed national RCIM strategy, with regional applications, to strengthen existing RCIM  
9 capacities to explore, track, monitor, respond, and adapt to the needs of each community. Our results  
10 also show that effective RCIM requires several essential components: an official RCIM strategy  
11 supported by dedicated personnel, infrastructure, financing, and resources, trustworthy leadership and  
12 governance, the expertise and capacity to inform policies and to gather, analyse, and communicate the  
13 best available information in real-time, effective messaging through mainstream and social media with  
14 local support, RCIM training for specialists among the healthcare workforce, and community  
15 engagement to maximise local outcomes.  
16  
17  
18  
19

### 20 **Official RCIM strategy with dedicated personnel, infrastructure, financing, and resources**

21 Effective RCIM requires having an official strategy, based on a credible conceptual framework, which  
22 drove this study, and consolidated lessons learned locally and elsewhere. Aspects of the strategy need  
23 to evolve and adapt based on changing circumstances and it is essential that consideration is given to  
24 roles and customised approaches at the national, regional, and community levels. This should involve an  
25 official core national rapid response team with clear roles, protocols, resources, and accountabilities,  
26 along with regional chapters.  
27  
28  
29

30 Second, the strategy needs to be supported by the infrastructure, financing, and resources to operate  
31 effectively. Respondents in our study suggested that in Iran, however, funding to enhance RCIM system  
32 capacity in terms of infrastructure and personnel is poor and they indicated that the lack of direct  
33 funding hindered the risk communication support during the pandemic. Although there are media and  
34 public communication experts, the number of those available with expertise and training in responding  
35 to major health risks is critically limited. Underfunding RCIM appears to be a common challenge in many  
36 countries. Evidence from south-east Asia (39), for example, revealed that during the COVID-19  
37 pandemic, few countries allocated resources to emergency risk communication. However, some specific  
38 areas have budgets, such as information education communication materials. Also, resource  
39 mobilisation and the use of non-governmental resources were reported as strategies to address this  
40 critical challenge within the country's national and provincial settings. Priority areas and optimal  
41 mobilisation and use of resources is an important consideration for further exploration.  
42  
43  
44  
45  
46

### 47 **Leadership and governanc**

48 The COVID-19 pandemic has highlighted the global importance of trustworthy and effective leaders who  
49 keep people at the forefront of their decisions, which they make transparently based on the best  
50 available evidence from a systems thinking perspective, and hold themselves accountable for outcomes  
51 (27). Leadership and governance are also at the heart of the WHO model of health systems (30).  
52 Similarly, every respondent in our study reinforced the fundamental importance to effective RCIM of  
53 leadership and governance.  
54  
55  
56

57 Leadership-wise, effective RCIM response involves ensuring that the official RCIM strategy, personnel,  
58 infrastructure, and resources identified in the previous point are in place. But these are insufficient on  
59 their own.  
60

1  
2  
3  
4  
5  
6  
7  
8  
9  
10  
11  
12  
13  
14  
15  
16  
17  
18  
19  
20  
21  
22  
23  
24  
25  
26  
27  
28  
29  
30  
31  
32  
33  
34  
35  
36  
37  
38  
39  
40  
41  
42  
43  
44  
45  
46  
47  
48  
49  
50  
51  
52  
53  
54  
55  
56  
57  
58  
59  
60

Effective RCIM leadership and governance depends on government officials and public health and other leaders earning people's trust through their integrity and public- versus self-interest. If either of these are considered compromised, RCIM efforts are vastly undermined, as was seen during the pandemic in Iran. Leaders also earn trust by instilling confidence that, in a timely manner, they have the expertise and capacity to access and interpret the most credible information, operationalise an evidence-informed strategy and adapt it when necessary, and make and communicate transparent decisions, along with their rationale. Credible information should be actively gathered from many sources, including international, national, and local experts, leaders in all related sectors, and community leaders and representatives. Effective leaders understand that tailored, two-way communication according to an accurate understanding of each stakeholder's and community's preferences is crucial. This communication involves asking important questions, active listening, sharing information, providing clear recommendations, tools, and customised messaging, and engaging local support to lead RCIM. Finally, respondents indicated that leaders need to hold themselves publicly accountable for outcomes.

Leaders' ability to deliver on their responsibilities requires the aforementioned strategy, personnel, infrastructure, and resources, as well as developing a network of diverse international, national, and local experts in various relevant disciplines, leaders from all sectors, RCIM specialists within the health workforce, and community leaders.

### **Information**

Effective RCIM relies on three approaches to information. The first is the expertise and capacity to, in a timely manner, proficiently screen, monitor, and verify the validity, relevance, and potential impact of available information from official and unofficial sources. The second is the ability to actively gather information from those with relevant expertise related to pandemic response and to RCIM strategies. The third is to communicate the most credible information to inform policymakers, government officials, public health, community leaders, and health and healthcare practitioners to equip them with the knowledge to create, implement, and adapt appropriate and effective strategies.

### **Media and communications**

Combatting infodemics hinges on credible and strategic messaging through official sources, including government and public health websites, as well as through mainstream and social media, in collaboration with local representatives. The collaborative contribution of the government, public health, leaders in various sectors, experts, and community leaders in circulating health information is a key strategy to counter mis- or disinformation during health emergencies. Understanding the needs, perceptions, priorities, and concerns of key stakeholders across public and private settings and identifying different opportunities and strategies for their involvement are critical steps to developing and implementing risk communication policies and strategies.

Developing or sustaining reputed and well-trusted communication channels is critically required to maximise the effectiveness and impact of communication strategies. How the community perceives various epidemics and health emergencies, what they perceive to be their role, how they are influenced, and how their views tally with the biomedical approach, are not entirely investigated in the country.

1  
2  
3 According to our findings, a lack of public trust in mass media and government channels directed Iranian  
4 citizens to the wide use of online social networks. Due to the dramatic reduction in social capita, most  
5 Iranians distrust governmental information sources, and this fact challenged the community's  
6 compliance with preventive behaviours (COVID-19 vaccination) during the COVID-19 pandemic. Lack of  
7 trust in the government as a source of information was reported globally in the existing literature.  
8 According to recent evidence, only 40% of the European citizens from the Economic Co-operation and  
9 Development countries participated in a survey and trusted their governments as sources of  
10 information about the Corona Virus (40). False claims about the activities, statistics, or policies of public  
11 and government authorities were reported as a major source of disinformation during the COVID-19  
12 pandemic, suggesting that "governments have not always succeeded in providing clear, useful, and  
13 trusted information to address pressing public questions" (41). Meanwhile, disinformation and claims  
14 may also be falsely attributed to official and governmental sources, amplifying this problem. In this  
15 regard, delivering truthful, evidence-informed, and compelling information to various audiences  
16 through their preferred channels and understanding behavioural and psychological biases is  
17 recommended. This is especially important for young audiences, who tend to access news and  
18 information predominantly via social media platforms(42). It is, therefore, a critical issue for health risk  
19 communication and infodemic management to ensure key factual messages reach all audiences. It is  
20 also important to effectively leverage the channel through which various audiences are relayed since  
21 different groups are likelier to trust media outlets that align with their views.  
22  
23  
24  
25  
26  
27  
28  
29

### 30 **RCIM training for health workforce**

31 While some capacity-building workshops for health professionals were held during the COVID-19  
32 pandemic by the Ministry of Health and medical universities, they were largely been ad hoc, of short  
33 duration (less than a week), and of variable quality. Those trained have often been public health  
34 professionals who then move on to other areas of public health. A planned and institutionalised  
35 approach to capacity-building is required to have an adequate pool of trained experts for epidemics and  
36 health emergencies. Therefore, financial resources and building risk communication expertise are  
37 critical priorities for the country. Obtaining both these resources will require the endorsement of senior  
38 policymakers. Advocacy to policy-makers and key decision-makers on the role and impact of RCIM is  
39 very important.  
40  
41  
42  
43

### 44 **Training**

45 RCIM is a broad and multi-disciplinary field involving health communication, health education, public  
46 affairs, behaviour change communication, and social mobilisation. It is therefore required to build the  
47 capacity of key contributors to verify, filter, and curate health information and use diverse  
48 communication channels to target public audiences (43). Community-based organisations, patient  
49 advocacy groups, professional associations, and non-governmental organisations with reputable brands,  
50 organisational resources, and a network of relationships can be leveraged to improve health risk  
51 communications. Existing evidence demonstrates that by partnering with local public health experts and  
52 policymakers to create information hubs and community outreach programs (44), these groups can  
53 significantly improve their ability to serve the information needs and concerns of diverse communities  
54 while also advocating for policy solutions. Existing evidence demonstrates that involving community  
55 members as planners, and attendees in pre-crisis planning activities, leads to increased preparedness  
56 and response activities. Therefore training in roles and responsibilities, relationship building, and team-  
57  
58  
59  
60

1  
2  
3 building are required strategies to facilitate and strengthen the contribution of community-based  
4 organisations, expert associations, and other relevant partners during epidemics and health  
5 emergencies (45).  
6  
7

### 8 **Community engagement**

9 Effective RCIM depends on engaging with communities to share information and to understand their  
10 unique concerns, experiences, wisdom, available resources, and preferred forms of communication, as  
11 well as to earn the support of community leaders as key intermediaries in response. These measures  
12 can maximise community collaboration and receptivity to ensuing recommendations. Given the social,  
13 contextual, economic, and geographical diversity that exists within countries, customised, community-  
14 based approaches essential for RCIM and health emergency response. Ethnographic and  
15 anthropological/social research on epidemics and health emergencies in the country could also help to  
16 improve understanding of the acceptability of response to emergencies and public health interventions.  
17 According to our interviews and expert panel discussion, the community was considered a missing piece  
18 in RCIM strategies in Iran. Information needs and concerns (e.g., disabilities, gender, age, literacy,  
19 cultural/ethnic backgrounds, access to technology) of the general Iranian population remained  
20 unexplored. In addition, the participatory engagement of citizens in a collective response to the COVID-  
21 19 infodemic was not only insufficient, but rather, at times, it was discouraged.  
22  
23  
24  
25  
26

27 During the COVID-19 pandemic, national health authorities and governments in most countries  
28 predominantly demonstrated top-down communication strategies (46). Effective RCIM requires a  
29 whole-of-society effort to sustain a healthy information ecosystem. Understanding the needs and  
30 concerns of vulnerable groups who might experience barriers to accessing accurate health information,  
31 care, and support, or be at higher risk of exposure and secondary impacts, such as children and adults  
32 with disabilities, is critically important(46). Effective risk communication can save lives during epidemics  
33 and health emergencies; however, existing evidence revealed that inadequate risk communication  
34 resulted in high exposure and loss of lives, as seen in Iran and Italy in the first wave (46, 47). Training  
35 and advising the general population on how to consume and share health information responsibly may  
36 be an effective strategy to improve the engagement and participation of public communities in risk  
37 communication and infodemic management. Investing in the community's media literacy, health  
38 literacy, and critical thinking skills before the crisis can prepare society to mitigate the physical and  
39 emotional consequences of false news and disinformation and increase resilience (48). As  
40 disinformation and infodemic during epidemics and health emergencies undermine trust, amplify fears,  
41 and consequently affect countries' responses to the global pandemic, tailored strategies to build and  
42 maintain trust among the public community are of utmost importance. Therefore, to be effective and  
43 foster public trust in government, any activities conducted in health risk communication and infodemic  
44 management must be guided by the principles of transparency, integrity, accountability, and  
45 community participation.  
46  
47  
48  
49  
50  
51  
52

### 53 **Limitations**

54 We address some limitations of the study. First, given that our study and the novel conceptual  
55 framework presented here are the first to address comprehensively the RCIM needs of, and strategies  
56 for, the Iranian health system context, further research and validation of its completeness and  
57 reliability, particularly after attempts to implement it, would be useful. Similarly, investigating causality  
58 and replicating the study with identical results can be challenging with qualitative studies of complex  
59  
60

1  
2  
3 phenomena. However, involving diverse sets of respondents with experience and expertise in leading  
4 RCIM in two phases of research before reaching total consensus heightens the potential for the  
5 framework to be considered credible and effective in being applied in the Iranian context. Further  
6 research could focus on applying best practices in RCIM, ecosystem mapping and analysis, and  
7 strengthening data collection and analysis for monitoring, evaluation, and learning. Investigating  
8 specific methods for evaluating RCIM activities are also important and critically recommended. Second,  
9 by focusing on the Iranian context, the transformability of the framework to other contexts remains yet  
10 untested. However, the high-level results echo leading international research on effective pandemic  
11 response and even if regional customisation would be beneficial, the current framework could  
12 potentially represent a well-informed basis for discussion, for further research, and for the creation of  
13 local versions.  
14  
15  
16  
17

### 18 **Conclusion**

19 This study was inspired by an appreciation for the extent to which the COVID-19 infodemic is reported  
20 to have impacted the spread and burden of the disease globally, and of the role that an effective risk  
21 communication and information management (RCIM) strategy can play in mitigating the impact of  
22 infodemics. The purpose of this research was to support increased RCIM capacity in Iran and beyond  
23 through the creation of a unique conceptual model of evidence-, expert-, and experience-informed  
24 strategies for RCIM during epidemics and health emergencies. Our findings suggest that ineffective  
25 RCIM impeded the emergency response in Iran's COVID-19 management, which is partly attributable to  
26 Iran's government and national public health authorities failing to infuse an evidence-informed and  
27 strategic RCIM into policy- and decision-making. Consequently, access to high-quality and real-time  
28 information was extensively restricted and not publicly available, and the provincial public health  
29 settings failed to establish effective community relationships with experts, researchers, professional  
30 councils, and NGOs to facilitate knowledge translation and utilisation. Further, the extensive use of  
31 social media platforms and mass media worsened the circulation of rumours, fake news, and  
32 disinformation and led to public distrust. The lessons learned from the outbreak management and  
33 response in Iran suggest that RCIM should be an essential component of health emergency readiness  
34 and response activities. This begins with trustworthy leaders at all levels who have integrity and make  
35 credible, transparent decisions, and hold themselves accountable for outcomes. A national RCIM  
36 program should be established to support the required infrastructures, personnel, and processes to  
37 address communication challenges during epidemics and health emergencies. This should be based on a  
38 conceptual model of RCIM to illustrate a collaborative and interdependent context of risk  
39 communication activities, implying that any improvements in these areas requires an integrated and  
40 holistic approach. The government, private sector and pharmaceutical industries, experts, and the  
41 public should be involved in time, contributing diverse views and fulfilling respective responsibilities.  
42 The conceptual model presented here has the potential to be either implemented or serve as the  
43 foundation for the creation of a similar model in other contexts. Sharing experiences, challenges, and  
44 leading practices among jurisdictions can further improve the reliability and credibility of guidance and  
45 strategies.  
46  
47  
48  
49  
50  
51  
52  
53  
54  
55  
56  
57  
58  
59  
60

### Ethics approval and consent to participate

This study was approved by the Research Ethics Committee of the Kerman University of Medical Sciences (**IR.KMU.REC.1400.379**). The Declaration of Helsinki was followed and informed consent was obtained from participants before starting the data collection stage.

### Availability of data and materials

The datasets used and/or analysed during the current study are available from the corresponding author upon reasonable request.

### Competing interests

All authors declared that they had no competing interests.

### Funding

This study was financially supported by World Health Organization-Regional Office for the Eastern Mediterranean (WHO-EMR) Call for Proposals for Special Grant for COVID-19 Research, 2022 (**WHO Reference: 2022/1291032-0**)

### Authors' contributions

AB contributed to the project concept and manuscript design, qualitative data collection and interpretation, critical review of the manuscript writing, and discussion of the manuscript. AS worked on data analysis, data interpretation, and writing of the manuscript. MSB worked on data analysis, data interpretation, and writing of the manuscript. HM worked on literature search, data interpretation, and writing of the manuscript. MS worked on data analysis, data interpretation, and writing of the manuscript. JMG worked on data analysis, data interpretation, and writing and revising of the manuscript. HS worked on the project concept and manuscript design, supervising, critically review of the manuscript writing, and discussion the manuscript. All authors read and approved the final manuscript.

### Patient or public involvement

No patients or members of the public were involved in the present study.

### Acknowledgments

The authors wish to thank the provincial and national public health professionals who contributed to this study, the WHO for their funding support, and the *BMJ Open* editor and peer reviewers for their valuable insights.

### References

1. Muñoz-Sastre D, Rodrigo-Martín L, Rodrigo-Martín I. The Role of Twitter in the WHO's Fight against the Infodemic. *International Journal of Environmental Research and Public Health*. 2021;18(22):11990.
2. Maharlouei N, Hosseinpour P, Erfani A, Shahriarirad R, Raeisi Shahrakie H, Rezaianzadeh A, et al. Factors associated with reluctance to acquire COVID-19 vaccination: A cross-sectional study in Shiraz, Iran, 2022. *Plos one*. 2022;17(12):e0278967.



1  
2  
3  
4  
5  
6  
7  
8  
9  
10  
11  
12  
13  
14  
15  
16  
17  
18  
19  
20  
21  
22  
23  
24  
25  
26  
27  
28  
29  
30  
31  
32  
33  
34  
35  
36  
37  
38  
39  
40  
41  
42  
43  
44  
45  
46  
47  
48  
49  
50  
51  
52  
53  
54  
55  
56  
57  
58  
59  
60

3. Charkazi A, Allah Kalteh E, Yatimparvar G, Rahimzadeh H, Koochaki G, Shahini N, et al. Prevalence of COVID-19 Vaccination Hesitancy and its Associated Factors based on the Health Belief Model among Iranian People in 2021. *Health Education Health Promotion*. 2022;10(4):679-85.
4. Mirzaie A, Halaji M, Dehkordi FS, Ranjbar R, Noorbazargan H. A narrative literature review on traditional medicine options for treatment of corona virus disease 2019 (COVID-19). *Complementary therapies in clinical practice*. 2020;40:101214.
5. Khaniki H, Rasi Tehrani H. Theorizing for Covid 19 infodemic in Iran social media. *Quarterly of Social Studies Research in Iran*. 2022:933-50.
6. Mheidly N, Fares J. Leveraging media and health communication strategies to overcome the COVID-19 infodemic. *Journal of public health policy*. 2020;41(4):410-20.
7. The Lancet Infectious D. The COVID-19 infodemic. *The Lancet Infectious diseases*. 2020;20(8):875-.
8. Health Topics: Infodemic [Internet]. Available from: [https://www.who.int/health-topics/infodemic#tab=tab\\_1](https://www.who.int/health-topics/infodemic#tab=tab_1).
9. Yang K-C, Pierrri F, Hui P-M, Axelrod D, Torres-Lugo C, Bryden J, et al. The covid-19 infodemic: Twitter versus facebook. *Big Data & Society*. 2021;8(1):20539517211013861.
10. Patel MP, Kute VB, Agarwal SK, Nephrology C-WGoISo. "Infodemic" COVID 19: More Pandemic than the Virus. *Indian journal of nephrology*. 2020;30(3):188-91.
11. Rathore FA, Farooq FJJPM. Information overload and infodemic in the COVID-19 pandemic. 2020;70(5):S162-S5.
12. Fernández-Torres MJ, Almansa-Martínez A, Chamizo-Sánchez R. Infodemic and fake news in Spain during the COVID-19 pandemic. *International journal of environmental research and public health*. 2021;18(4):1781.
13. Sørensen K, Pelikan JM, Röthlin F, Ganahl K, Slonska Z, Doyle G, et al. Health literacy in Europe: comparative results of the European health literacy survey (HLS-EU). *European journal of public health*. 2015;25(6):1053-8.
14. Lorini C, Ierardi F, Bachini L, Donzellini M, Gemmi F, Bonaccorsi G. The antecedents and consequences of health literacy in an ecological perspective: results from an experimental analysis. *International journal of environmental research and public health*. 2018;15(4):798.
15. Vinck P, Pham PN, Bindu KK, Bedford J, Nilles EJ. Institutional trust and misinformation in the response to the 2018–19 Ebola outbreak in North Kivu, DR Congo: a population-based survey. *The Lancet Infectious Diseases*. 2019;19(5):529-36.
16. Carr-Hill R, Currie E. What explains the distribution of doctors and nurses in different countries, and does it matter for health outcomes? *Journal of Advanced Nursing*. 2013;69(11):2525-37.
17. Zar HJ, Dawa J, Fischer GB, Castro-Rodriguez JA. Challenges of COVID-19 in children in low-and middle-income countries. *Paediatric respiratory reviews*. 2020;35:70-4.
18. Geldsetzer P. Knowledge and perceptions of COVID-19 among the general public in the United States and the United Kingdom: a cross-sectional online survey. *Annals of internal medicine*. 2020;173(2):157-60.
19. Islam MS, Sarkar T, Khan SH, Kamal A-HM, Hasan SM, Kabir A, et al. COVID-19–related infodemic and its impact on public health: A global social media analysis. *The American journal of tropical medicine and hygiene*. 2020;103(4):1621.
20. Kim HK, Ahn J, Atkinson L, Kahlor LA. Effects of COVID-19 misinformation on information seeking, avoidance, and processing: A multicountry comparative study. *Science Communication*. 2020;42(5):586-615.
21. Lockyer B, Islam S, Rahman A, Dickerson J, Pickett K, Sheldon T, et al. Understanding COVID-19 misinformation and vaccine hesitancy in context: Findings from a qualitative study involving citizens in Bradford, UK. *Health Expectations*. 2021;24(4):1158-67.
22. Mirhashemi SMH. Infodemic in the countries around the world after corona virus outbreak; Necessity of Media literacy and information literacy improvement for citizens. *Applied Politics*. 2022;3(1):239-50.



23. World Health Organization. Infodemic management: an overview of infodemic management during COVID-19, January 2020–May 2021. 2021.
24. Tangcharoensathien V, Calleja N, Nguyen T, Purnat T, D'Agostino M, Garcia-Saiso S, et al. Framework for managing the COVID-19 infodemic: methods and results of an online, crowdsourced WHO technical consultation. *Journal of medical Internet research*. 2020;22(6):e19659.
25. Lohiniva A-L, Nurzhynska A, Hudi A-h, Anim B. Infodemic Management Using Digital Information and Knowledge Cocreation to Address COVID-19 Vaccine Hesitancy: Case Study From Ghana. *JMIR infodemiology*. 2022;2(2):e37134.
26. Naeem SB, Bhatti R. The Covid-19 'infodemic': a new front for information professionals. *Health Information & Libraries Journal*. 2020;37(3):233-9.
27. Eysenbach G. How to fight an infodemic: the four pillars of infodemic management. *Journal of medical Internet research*. 2020;22(6):e21820.
28. Radu R. <? covid19?> Fighting the 'Infodemic': Legal Responses to COVID-19 Disinformation. *Social Media+ Society*. 2020;6(3):2056305120948190.
29. Hua J, Shaw R. Corona virus (Covid-19) "infodemic" and emerging issues through a data lens: The case of china. *International journal of environmental research and public health*. 2020;17(7):2309.
30. Organization WH. Everybody's business: strengthening health systems to improve health outcomes: WHO's framework for action. Geneva: WHO; 2007. 2018.
31. Bradley EH. Intersectoral collaboration: what works and what doesn't. *International Journal of Health Policy Management*. 2023.
32. Hiller M, Bracht H, Schroeder S. One year with the COVID-19 pandemic– Lessons learnt? Intersectoral collaboration measures established during the crisis could benefit capacity and patient flow management in daily clinical practice. *Journal of Health Organization Management*. 2022;36(2):141-8.
33. White D. Application of systems thinking to risk management:: a review of the literature. *Management Decision*. 1995.
34. Olson CM. Consensus statements: applying structure. *JAMA*. 1995;273(1):72-3.
35. Geerts JM, Kinnair D, Taheri P, Abraham A, Ahn J, Atun R, et al. Guidance for health care leaders during the recovery stage of the COVID-19 pandemic: a consensus statement. *JAMA network open*. 2021;4(7):e2120295-e.
36. Dossett LA, Kaji AH, Cochran A. SRQR and COREQ reporting guidelines for qualitative studies. *JAMA surgery*. 2021;156(9):875-6.
37. Braun V, Clarke V. Using thematic analysis in psychology. *Qualitative research in psychology*. 2006;3(2):77-101.
38. Press TA. WHO chief warns world leaders against "politicizing" pandemic. *CBC News*. 2020.
39. Ofrin R, Buddha N, Htike M, Bhola A, Bezbaruah S. Strengthening risk communication systems for public health emergencies in the WHO South-East Asia Region. *WHO South-East Asia Journal of Public Health*. 2020;9(1):15-20.
40. Eldman. Eldman Trust Baromter 2020 2020 [Available from: [https://www.edelman.com/sites/g/files/aatuss191/files/2020-03/2020%20Edelman%20Trust%20Barometer%20Coronavirus%20Special%20Report\\_0.pdf](https://www.edelman.com/sites/g/files/aatuss191/files/2020-03/2020%20Edelman%20Trust%20Barometer%20Coronavirus%20Special%20Report_0.pdf)].
41. Brennen JS, Simon FM, Howard PN, Nielsen RK. Types, sources, and claims of COVID-19 misinformation: University of Oxford; 2020.
42. Neavel C, Watkins SC, Chavez M. Youth, social media, and telehealth: How COVID-19 changed our interactions. *Pediatric Annals*. 2022;51(4):e161-e6.
43. Goulbourne T, Yanovitzky I. The communication infrastructure as a social determinant of health: implications for health Policymaking and practice. *The Milbank Quarterly*. 2021;99(1):24.
44. Hering JG. Do we need "more research" or better implementation through knowledge brokering? *Sustainability Science*. 2016;11(2):363-9.
45. World Health Organization. Communicating risk in public health emergencies: a WHO guideline for emergency risk communication (ERC) policy and practice: World Health Organization; 2017.

- 1  
2  
3 46. Khan S, Mishra J, Ahmed N, Onyige CD, Lin KE, Siew R, et al. Risk communication and community  
4 engagement during COVID-19. *International Journal of Disaster Risk Reduction*. 2022;74:102903.  
5 47. Chakrabarti A. Confusion in Italy, clarity in Singapore — how govts are communicating during  
6 coronavirus 2020 [cited 2022 26/11]. Available from: [https://theprint.in/world/confusion-in-italy-  
8 clarity-in-singapore-how-govts-are-communicating-during-coronavirus/378932/](https://theprint.in/world/confusion-in-italy-<br/>7 clarity-in-singapore-how-govts-are-communicating-during-coronavirus/378932/).  
9 48. Xie L, Pinto J, Zhong B. Building community resilience on social media to help recover from the  
10 COVID-19 pandemic. *Computers in Human Behavior*. 2022;134:107294.  
11  
12  
13  
14  
15  
16  
17  
18  
19  
20  
21  
22  
23  
24  
25  
26  
27  
28  
29  
30  
31  
32  
33  
34  
35  
36  
37  
38  
39  
40  
41  
42  
43  
44  
45  
46  
47  
48  
49  
50  
51  
52  
53  
54  
55  
56  
57  
58  
59  
60

For peer review only

| <br><b>Leadership &amp; governance</b>                                                                                                                                                                                                                                                                                                                                                                                                                                                                                                                                                                                                                                                              | <br><b>Information</b>                                                                                                                                                                                                                                                                                                                                                                                                                                                                                                                                | <br><b>Health workforce</b>                                                                                                                                                                                                                                                                                                                                      | <br><b>Financing</b>  | <br><b>Media</b>                                                                                                                                                                                                                                                                                                                                                                                                                                                                                        | <br><b>Community</b>                                                                                                                                                                                                                                                                                                                                                                                                                                                                                          |
|--------------------------------------------------------------------------------------------------------------------------------------------------------------------------------------------------------------------------------------------------------------------------------------------------------------------------------------------------------------------------------------------------------------------------------------------------------------------------------------------------------------------------------------------------------------------------------------------------------------------------------------------------------------------------------------------------------------------------------------------------------------------------------------|----------------------------------------------------------------------------------------------------------------------------------------------------------------------------------------------------------------------------------------------------------------------------------------------------------------------------------------------------------------------------------------------------------------------------------------------------------------------------------------------------------------------------------------------------------------------------------------------------------------------------------------|---------------------------------------------------------------------------------------------------------------------------------------------------------------------------------------------------------------------------------------------------------------------------------------------------------------------------------------------------------------------------------------------------------------------------------------------------|--------------------------------------------------------------------------------------------------------|------------------------------------------------------------------------------------------------------------------------------------------------------------------------------------------------------------------------------------------------------------------------------------------------------------------------------------------------------------------------------------------------------------------------------------------------------------------------------------------------------------------------------------------------------------------------------------------|--------------------------------------------------------------------------------------------------------------------------------------------------------------------------------------------------------------------------------------------------------------------------------------------------------------------------------------------------------------------------------------------------------------------------------------------------------------------------------------------------------------------------------------------------------------------------------------------------|
| <p><b>Structure</b><br/>Clearly defined personnel, roles, protocols, supports, and accountabilities</p> <p><b>Ethics</b><br/>Integrity, equity, transparency, and accountability</p> <p><b>System capacity</b><br/>Develop infrastructures for monitoring, social listening, communicating, and distilling the best available information and recommendations</p> <p><b>Operationalisation</b><br/>Develop, implement, and evaluate communication policies and strategies for potential risks</p> <p><b>Engagement</b><br/>Create population, multisector, and community involvement for risk communication</p> <p><b>Institutional/provincial design</b><br/>Polycentric governance to share information and inform and guide local responses, including by using crowdsourcing</p> | <p><b>Platform</b><br/>Develop a networked platform for real-time and reliable data collection, including from international sources</p> <p><b>Surveillance</b><br/>Use the information to investigate, prepare, and effectively respond to challenges</p> <p><b>Policy making</b><br/>Use of surveillance data for evidence-based decision-making and recommendations</p> <p><b>Evaluation and adaptation</b><br/>Regular monitoring and analysis of the system for continuous quality and reliability of data sources</p> <p><b>Knowledge sharing</b><br/>Develop, implement, support, and facilitate accurate knowledge sharing</p> | <p><b>Diversity and flexibility</b><br/>Prepare diverse specialists in all parts of the system with the various skills needed to respond effectively to evolving challenges</p> <p><b>Limited resources</b><br/>Prepare an adequate number of professionals, despite scarce resources</p> <p><b>Community involvement</b><br/>Resource capacity beyond health professionals, such as scientists and experts, professional councils, and NGOs.</p> | <p><b>Resource allocation</b><br/>Ensure there is adequate financing and use resources effectively</p> | <p><b>Mass Media</b><br/>Develop communication channels through Television, radio, and newspapers</p> <p><b>Government and health authorities' websites</b><br/>Develop validated sources of information with high accessibility and timeliness</p> <p><b>Social media platforms</b><br/>Use social media to increase access to credible information and recommendations and to combat misinformation</p> <p><b>Source Credibility</b><br/>Build and maintain trust in formal sources</p> <p><b>Formal spokespersons</b><br/>Identify and prepare credible and qualified individuals</p> | <p><b>Diversity</b><br/>Customise responses based on the diverse needs of communities with different cultures, ethnicity, and geographies</p> <p><b>Engagement</b><br/>Involve, consult, inform, engage, and collaborate with diverse communities and leaders</p> <p><b>Resilience</b><br/>Improve health, media, and digital literacy, and provide evidence-based tools</p> <p><b>Empowerment</b><br/>Enable communities to develop their own solutions and identify local influencers</p> <p><b>Trust</b><br/>Build and maintain trust to maximise social cohesion and successful response</p> |

Figure 1

668x471mm (38 x 38 DPI)

1  
2  
3  
4  
5  
6  
7  
8  
9  
10  
11  
12  
13  
14  
15  
16  
17  
18  
19  
20  
21  
22  
23  
24  
25  
26  
27  
28  
29  
30  
31  
32  
33  
34  
35  
36  
37  
38  
39  
40  
41  
42  
43  
44  
45  
46  
47  
48  
49  
50  
51  
52  
53  
54  
55  
56  
57  
58  
59  
60

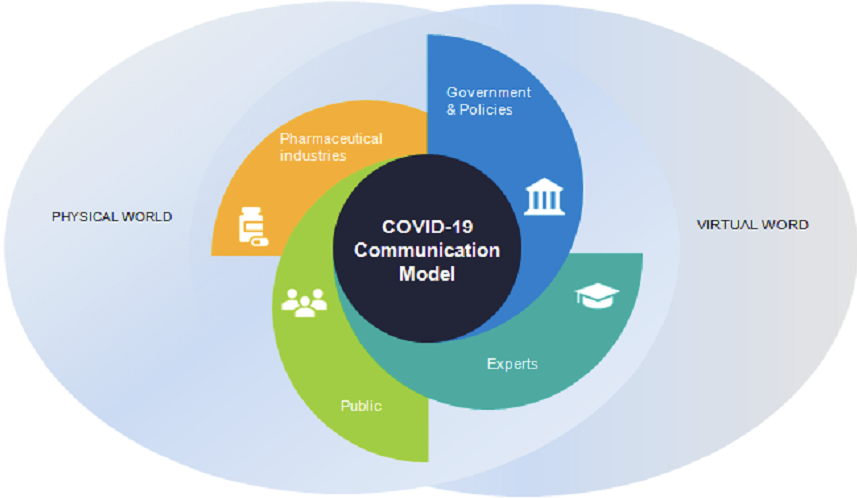

Figure 2

235x136mm (108 x 108 DPI)

## Interview guide

### Part I: Demographic information

Age .....

Gender Female / Male

Educational level .....

Academic discipline .....

What organizational position were you involved in at the time of the Covid 19 epidemic? .....

### Part II: Perceptions, experiences, future directions

The main purpose of the questions in this section is to identify effective strategies and successful experiences in the field of infodemic management related to Covid 19 in Kerman province. Please answer the following questions based on your experiences or field observations.

- 1- The spread of misleading, inaccurate, and fake information about COVID-19 disease and vaccination has been one of the consequences of the COVID-19 epidemic, which affects the behavior of society and trust in the health system. What experience did you have in managing misinformation? What did you do in a situation in the province where accurate information was not yet available? Can you explain your own experiences in this field?
- 2- 2. What challenges and obstacles did you face in combating inaccurate information and infodemic management?
- 3- What did you do in response to the obstacles and challenges?
- 4- How did you find out about the effectiveness of your interventions and actions?
- 5- 5- If the pandemic situation is repeated, what is your approach to managing infodemic?

## Informed Consent

Hi,

My name is Azam Bazrafshan. My colleague and I are from the Kerman University of Medical Sciences. We interview executives, technical experts, decision-makers, and leaders of public health initiatives who had participated in the provincial, or national COVID-19 prevention and control programs to use the results to improve health interventions during epidemics, pandemics, and global health crises. We are intended to investigate processes, infrastructure, strategies, successful experiences and challenges in the field of infodemic management related to Covid 19 in Kerman province. You are being invited to take part in this research because we feel that your experience as a public health leader can contribute much to our understanding and knowledge of processes and infrastructure of infodemic management during health epidemics.

Your participation in this research is entirely voluntary. It is your choice whether to participate or not. If you choose not to participate all the services you receive at this Centre will continue and nothing will change.

In this interview, I will not ask your name, nor will I need your address. All your answers will be completely confidential. We only use the total responses for statistical survey. During this interview, private questions may also be asked and I have to emphasize that although your honest cooperation is valuable, you can answer any question you think appropriate. The estimated time of interview is about 30 minutes and the interview is recorded by tape recorder.

You do not have to take part in this research if you do not wish to do so, and choosing to participate will not affect your job or job-related evaluations in any way. You may stop participating in the interview at any time that you wish without your job being affected. I will give you an opportunity at the end of the interview to review your remarks, and you can ask to modify or remove portions of those, if you do not agree with my notes or if I did not understand you correctly.

**I have read the foregoing information, or it has been read to me. I have had the opportunity to ask questions about it and any questions I have been asked have been answered to my satisfaction. I consent voluntarily to be a participant in this study**

**Signature of Participant** \_\_\_\_\_

**Date** \_\_\_\_\_ **Day/month/year**

Signature

Appendix 3. Themes and subthemes related to the challenges and successful activities of infodemic management across provincial/national public health settings in Iran

| Theme                              | Sub-theme               | Sample Quotes                                                                                                                                                                                                                                                                                                                                                        |
|------------------------------------|-------------------------|----------------------------------------------------------------------------------------------------------------------------------------------------------------------------------------------------------------------------------------------------------------------------------------------------------------------------------------------------------------------|
| <b>Leadership &amp; governance</b> |                         |                                                                                                                                                                                                                                                                                                                                                                      |
| Ethics                             | Transparency            | When I report falsely on the radio, people would understand. If I have this transparency at the national and university level, people will gain their trust, but this strategy does not exist, it certainly does not exist, neither at the national level, nor at the university or provincial level. (Man, 47 years old)                                            |
|                                    |                         | There is a level of transparency that the government should have, the officials should have, I would say that it is extremely small considering the structure of our country. (Man, 42 years old)                                                                                                                                                                    |
|                                    | Accountability          | No one was responsible, a disaster happened, I learned by myself, it was unknown to us, we could have managed this if the ministry had interfered less, the ministry acted badly and this bad behavior spread everywhere.(Man, 55 years old)                                                                                                                         |
|                                    | Conflicts of interests  | Conflict of interests is one of the most important challenges in the Ministry of Health, which hinders transparency. Profit seeking of companies that produce personal protective equipment, diagnostic and therapeutic equipment, and vaccines, is One of the most important examples of conflicts of interests during the pandemic management. (Man, 70 years old) |
| Capacity                           | Infrastructures         | We need a quick reaction team that is in contact with academic centers, regularly monitors and examines community's needs and concerns. (Man, 49 years old)                                                                                                                                                                                                          |
|                                    |                         | ... and can quickly identify rumours and false information and design an answer to them. (Man, 42 years old)                                                                                                                                                                                                                                                         |
|                                    |                         | A multi-disciplinary risk communication team should be formed to be responsible for informing and making decisions. (Man, 58 years old)                                                                                                                                                                                                                              |
|                                    | Rules & regulations     | During the pandemic, there were people who published false and contradictory information, and there was no authority to deal with this issue and deal with them judicially, while in many countries, when the issue of people's health is discussed, false information is not allowed to be published. (Man, 70 years old)                                           |
|                                    | Policies and strategies | There is no specific strategy and program to deal with infodemic and manage risk communication in the country. (Man, 70 years old)                                                                                                                                                                                                                                   |
|                                    | Role definition         | The duties and responsibilities of people in crisis situations should be clear so that everyone does not act and speak as they wish... The goals of the programs should be clear and the responsibilities of each member of the committees should be clearly stated. (Man, 53 years old)                                                                             |
| Operational isation                | Timeliness              | In order to prepare in crisis conditions, it is necessary to make necessary plans before every crisis. (Man, 45 years old)                                                                                                                                                                                                                                           |
|                                    | Coordination            | One of our most important problems was the lack of coordination between the government and the officials in the matter of information. There were several voices and no coordination between different sources in the health department. (Man, 58 years old)                                                                                                         |



|                                 |                                 |                                                                                                                                                                                                                                                                                                                                                                                                                                                                                                                                                                                                                                                 |
|---------------------------------|---------------------------------|-------------------------------------------------------------------------------------------------------------------------------------------------------------------------------------------------------------------------------------------------------------------------------------------------------------------------------------------------------------------------------------------------------------------------------------------------------------------------------------------------------------------------------------------------------------------------------------------------------------------------------------------------|
| Institutional/provincial design | Knowledge exchange              | In the discussion of pandemic management, the provinces were left to their own devices, and no province was aware of the activities of other provinces in the management of the infodemic. (Man, 55 years old)                                                                                                                                                                                                                                                                                                                                                                                                                                  |
| <b>Information</b>              |                                 |                                                                                                                                                                                                                                                                                                                                                                                                                                                                                                                                                                                                                                                 |
| <b>Theme</b>                    | <b>Sub-theme</b>                | <b>Sample quotes</b>                                                                                                                                                                                                                                                                                                                                                                                                                                                                                                                                                                                                                            |
| Surveillance                    | Timeliness                      | No real-time data were available about the mortality of COVID-19 cases. Even now, if we refer to the statistical systems, we will not get a correct and reliable information and coordination so that we can inform the community. (Man, 48 years old)<br><br>Unfortunately, many of the events that happened in the country have not been documented and, for example, we do not know how many patients were infected with Corona, how many died. Even the medical and nursing systems used to come and give general information. It showed that either they don't have this information or they don't want to publish it. (Man, 49 years old) |
|                                 | Data quality                    | No consensus data were available as mortality data reported by the hospitals, forensic systems, and cemeteries, were very contradictory. (Man, 48 years old)                                                                                                                                                                                                                                                                                                                                                                                                                                                                                    |
|                                 | Surveillance systems            | Surveillance data were extremely out of date, with low quality and consistency. (Man, 54 years old)<br><br>Our surveillance data were not accurate and real-time. (Man, 48 years old)<br><br>Therefore, it seems that we need a system that collects information from the environmental levels in a database in the form of software that has the power of analysis to give us alarms in different places. Its infrastructure in the country is planned as a syndromic care system, but I don't know if it has actually been implemented. (Man, 49 years old)                                                                                   |
| Knowledge translation           | Evidence-informed policy making | No evidence about the effectiveness of interventions were synthesised and published for decision making. (Man, 54 years old)<br><br>The next problem was that the correct information did not reach those who should manage infodemic, for example, the number of patients at any moment, the number of deaths, what was the cause of death. (Man, 52 years old)                                                                                                                                                                                                                                                                                |
|                                 | Knowledge translation Capacity  | Most of the statistics and information will be based on taste and subjective and this will cause individual perceptions and people will allow themselves to give any statistics. (Man, 48 years old)                                                                                                                                                                                                                                                                                                                                                                                                                                            |
| <b>Health workforce</b>         |                                 |                                                                                                                                                                                                                                                                                                                                                                                                                                                                                                                                                                                                                                                 |
| <b>Theme</b>                    | <b>Sub-theme</b>                | <b>Sample Quote</b>                                                                                                                                                                                                                                                                                                                                                                                                                                                                                                                                                                                                                             |
| Capacity building               | Diversity and flexibility       | That's why we have to find an entry in the educational fields and teach this issue seriously in the form of workshops for groups close to graduation or students in the form of refresher courses regularly and continuously. Let's define a retraining unit for it and implement it operationally, not just theoretically. (Man, 48 years old)                                                                                                                                                                                                                                                                                                 |
| Challenges                      | Limited resources               | One of our most important challenges in risk communication and infodemic management is the lack of trained and expert people in this field. (Man, 70 years old)                                                                                                                                                                                                                                                                                                                                                                                                                                                                                 |

|                            |                                           |                                                                                                                                                                                                                                                                                                                                                                                                                     |
|----------------------------|-------------------------------------------|---------------------------------------------------------------------------------------------------------------------------------------------------------------------------------------------------------------------------------------------------------------------------------------------------------------------------------------------------------------------------------------------------------------------|
| Engagement                 | Community involvement                     | The non-participation of experts from different scientific fields in the pandemic management and informing the people was a big challenge, which caused people who had good experience or knowledge to be ignored, and therefore, unqualified people were in charge of informing the people. (Man, 42 years old)                                                                                                    |
| <b>Financial resources</b> |                                           |                                                                                                                                                                                                                                                                                                                                                                                                                     |
| <b>Theme</b>               | <b>Sub-theme</b>                          | <b>Sample Quote</b>                                                                                                                                                                                                                                                                                                                                                                                                 |
| Government resources       | Planning                                  | Particular financial sources should be allocated to the risk communication activities. (Man, 66 years old)                                                                                                                                                                                                                                                                                                          |
| <b>Media</b>               |                                           |                                                                                                                                                                                                                                                                                                                                                                                                                     |
| <b>Theme</b>               | <b>Sub-theme</b>                          | <b>Sample Quote</b>                                                                                                                                                                                                                                                                                                                                                                                                 |
| Communication channels     | Mass media                                | National TV and Radio channels are still the biggest and most influential communication channels in Iran. (Man, 46 years old)                                                                                                                                                                                                                                                                                       |
|                            | Government & health authorities' websites | We used both video media such as radio and television, as well as written media such as magazines, newspapers, and government websites, which were very active during the Corona era, to communicate the data related to the incidence of the disease in the province and recommend preventive measures. (Man, 49 years old)                                                                                        |
|                            | Social media platforms                    | We have established a social media platform (Instagram) named Dr+ to communicate with people and held online discussion panels with contribution of clinical physicians to address the community's needs and concerns. (Man, 53 years old)                                                                                                                                                                          |
| Trust                      | Source credibility                        | Communication channels should be used that are highly credible and people trust to them. Some brand communication channels should be developed to maximize the impact and penetration of information among people. (Man, 47 years old)                                                                                                                                                                              |
| spokespersons              | Competence                                | For a person to be a spokesperson and to give information, to know how to give information, not to be too hopeful, not to speak too hopelessly, this is real information when we say not only to report numbers... For example, when the pandemic came, someone said that there is nothing, someone said Wow, we are unfortunate, which one of these people should accept when they look at it? (Man, 58 years old) |
| <b>Community</b>           |                                           |                                                                                                                                                                                                                                                                                                                                                                                                                     |
| <b>Theme</b>               | <b>Sub-theme</b>                          | <b>Example Strategies</b>                                                                                                                                                                                                                                                                                                                                                                                           |
| Diversity                  | Social context                            | The penetration rate of scientific issues in our society is low, which is related to various issues, so if we ever want to increase this penetration rate, we have to approach from different social and cultural aspects. (Man, 54 years old)                                                                                                                                                                      |
| Engagement & empowerment   | interventions                             | We have developed a community engagement facility to listen the community's needs and expectations and answer to their concerns and questions interactively. (Man, 55 years old)<br><br>Safirane-Salamat was a group of trained volunteers who communicate health information with their families and their neighbourhood. (Man, 55 years old)                                                                      |

1  
2  
3  
4  
5  
6  
7  
8  
9  
10  
11  
12  
13  
14  
15  
16  
17  
18  
19  
20  
21  
22  
23  
24  
25  
26  
27  
28  
29  
30  
31  
32  
33  
34  
35  
36  
37  
38  
39  
40  
41  
42  
43  
44  
45  
46  
47  
48  
49  
50  
51  
52  
53  
54  
55  
56  
57  
58  
59  
60

|       |                                          |                                                                                                                                                                                                                                                                                                                                                                                                                                                             |
|-------|------------------------------------------|-------------------------------------------------------------------------------------------------------------------------------------------------------------------------------------------------------------------------------------------------------------------------------------------------------------------------------------------------------------------------------------------------------------------------------------------------------------|
| Trust | Trust to government and health officials | Public opinion has no trust in the government, especially in matters that are officially announced. (Man, 47 years old)<br><br>Anyone, any scientist, any distinguished person, any accepted person comes and says something, the first time people do not accept it, especially if it is actually what the government says or emphasizes, people will definitely look for the opposite and say that there is something fishy about it. (Man, 53 years old) |
|-------|------------------------------------------|-------------------------------------------------------------------------------------------------------------------------------------------------------------------------------------------------------------------------------------------------------------------------------------------------------------------------------------------------------------------------------------------------------------------------------------------------------------|

For peer review only

## Standards for reporting qualitative research (SRQR) checklist

| No                        | Topic                                      | Item                                                                                                                                                                                                                                                                                                                                             | Page number |
|---------------------------|--------------------------------------------|--------------------------------------------------------------------------------------------------------------------------------------------------------------------------------------------------------------------------------------------------------------------------------------------------------------------------------------------------|-------------|
| <b>Title and abstract</b> |                                            |                                                                                                                                                                                                                                                                                                                                                  |             |
| S1                        | Title                                      | Concise description of the nature and topic of the study Identifying the study as qualitative or indicating the approach (e.g., ethnography, grounded theory) or data collection methods (e.g., interview, focus group) is recommended                                                                                                           | 1           |
| S2                        | Abstract                                   | Summary of key elements of the study using the abstract format of the intended publication; typically includes background, purpose, methods, results, and conclusions                                                                                                                                                                            | 1           |
| <b>Introduction</b>       |                                            |                                                                                                                                                                                                                                                                                                                                                  |             |
| S3                        | Problem formulation                        | Description and significance of the problem/phenomenon studied; review of relevant theory and empirical work; problem statement                                                                                                                                                                                                                  | 2           |
| S4                        | Purpose or research question               | Purpose of the study and specific objectives or questions                                                                                                                                                                                                                                                                                        | 3           |
| <b>Methods</b>            |                                            |                                                                                                                                                                                                                                                                                                                                                  |             |
| S5                        | Qualitative approach and research paradigm | Qualitative approach (e.g., ethnography, grounded theory, case study, phenomenology, narrative research) and guiding theory if appropriate; identifying the research paradigm (e.g., postpositivist, constructivist/ interpretivist) is also recommended; rationale                                                                              | 4           |
| S6                        | Researcher characteristics and reflexivity | Researchers' characteristics that may influence the research, including personal attributes, qualifications/experience, relationship with participants, assumptions, and/or presuppositions; potential or actual interaction between researchers' characteristics and the research questions, approach, methods, results, and/or transferability | -           |
| S7                        | Context                                    | Setting/site and salient contextual factors; rationale                                                                                                                                                                                                                                                                                           | 4           |
| S8                        | Sampling strategy                          | How and why research participants, documents, or events were selected; criteria for deciding when no further sampling was necessary (e.g., sampling saturation); rationale                                                                                                                                                                       | 4           |

|                  |                                                                                              |                                                                                                                                                                                                                                                                                                       |                     |
|------------------|----------------------------------------------------------------------------------------------|-------------------------------------------------------------------------------------------------------------------------------------------------------------------------------------------------------------------------------------------------------------------------------------------------------|---------------------|
| S9               | Ethical issues pertaining to human subjects                                                  | Documentation of approval by an appropriate ethics review board and participant consent, or explanation for lack thereof; other confidentiality and data security issues                                                                                                                              | 4                   |
| S10              | Data collection methods                                                                      | Types of data collected; details of data collection procedures including (as appropriate) start and stop dates of data collection and analysis, iterative process, triangulation of sources/methods, and modification of procedures in response to evolving study findings; rationale                 | 4-5                 |
| S11              | Data collection instruments and technologies                                                 | Description of instruments (e.g., interview guides, questionnaires) and devices (e.g., audio recorders) used for data collection; if/how the instrument(s) changed over the course of the study                                                                                                       | 4-5                 |
| S12              | Units of study                                                                               | Number and relevant characteristics of participants, documents, or events included in the study; level of participation (could be reported in results)                                                                                                                                                | NA                  |
| S13              | Data processing                                                                              | Methods for processing data prior to and during analysis, including transcription, data entry, data management and security, verification of data integrity, data coding, and anonymization/deidentification of excerpts                                                                              | 4-5                 |
| S14              | Data analysis                                                                                | Process by which inferences, themes, etc., were identified and developed, including the researchers involved in data analysis; usually references a specific paradigm or approach; rationale                                                                                                          | 4-5                 |
| S15              | Techniques to enhance trustworthiness                                                        | Techniques to enhance trustworthiness and credibility of data analysis (e.g., member checking, audit trail, triangulation); rationale                                                                                                                                                                 | 5                   |
| Results/findings |                                                                                              |                                                                                                                                                                                                                                                                                                       |                     |
| S16              | Synthesis and interpretation                                                                 | Main findings (e.g., interpretations, inferences, and themes); might include development of a theory or model, or integration with prior research or theory                                                                                                                                           | 5                   |
| S17              | Links to empirical data                                                                      | Evidence (e.g., quotes, field notes, text excerpts, photographs) to substantiate analytic findings                                                                                                                                                                                                    | 6-<br>appendix<br>3 |
| Discussion       |                                                                                              |                                                                                                                                                                                                                                                                                                       |                     |
| S18              | Integration with prior work, implications, transferability, and contribution(s) to the field | Short summary of main findings; explanation of how findings and conclusions connect to, support, elaborate on, or challenge conclusions of earlier scholarship; discussion of scope of application/generalizability; identification of unique contribution(s) to scholarship in a discipline or field | 11                  |
| S19              | Limitations                                                                                  | Trustworthiness and limitations of findings                                                                                                                                                                                                                                                           | 13                  |
| Other            |                                                                                              |                                                                                                                                                                                                                                                                                                       |                     |

|     |                       |                                                                                                                |    |
|-----|-----------------------|----------------------------------------------------------------------------------------------------------------|----|
| S20 | Conflicts of interest | Potential sources of influence or perceived influence on study conduct and conclusions; how these were managed | 14 |
| S21 | Funding               | Sources of funding and other support; role of funders in data collection, interpretation, and reporting        | 15 |
|     |                       |                                                                                                                |    |

For peer review only

# BMJ Open

## Health risk communication and infodemic management in Iran: Development and validation of a conceptual framework

|                                 |                                                                                                                                                                                                                                                                                                                                                                                                                                                                                                                                                                                                                                                                                                                                                                                                                                                                                                                                                                                                                                                                                                                                                                                                                                                                                                                                                                                                                                                                                                    |
|---------------------------------|----------------------------------------------------------------------------------------------------------------------------------------------------------------------------------------------------------------------------------------------------------------------------------------------------------------------------------------------------------------------------------------------------------------------------------------------------------------------------------------------------------------------------------------------------------------------------------------------------------------------------------------------------------------------------------------------------------------------------------------------------------------------------------------------------------------------------------------------------------------------------------------------------------------------------------------------------------------------------------------------------------------------------------------------------------------------------------------------------------------------------------------------------------------------------------------------------------------------------------------------------------------------------------------------------------------------------------------------------------------------------------------------------------------------------------------------------------------------------------------------------|
| Journal:                        | <i>BMJ Open</i>                                                                                                                                                                                                                                                                                                                                                                                                                                                                                                                                                                                                                                                                                                                                                                                                                                                                                                                                                                                                                                                                                                                                                                                                                                                                                                                                                                                                                                                                                    |
| Manuscript ID                   | bmjopen-2023-072326.R2                                                                                                                                                                                                                                                                                                                                                                                                                                                                                                                                                                                                                                                                                                                                                                                                                                                                                                                                                                                                                                                                                                                                                                                                                                                                                                                                                                                                                                                                             |
| Article Type:                   | Original research                                                                                                                                                                                                                                                                                                                                                                                                                                                                                                                                                                                                                                                                                                                                                                                                                                                                                                                                                                                                                                                                                                                                                                                                                                                                                                                                                                                                                                                                                  |
| Date Submitted by the Author:   | 01-Jul-2023                                                                                                                                                                                                                                                                                                                                                                                                                                                                                                                                                                                                                                                                                                                                                                                                                                                                                                                                                                                                                                                                                                                                                                                                                                                                                                                                                                                                                                                                                        |
| Complete List of Authors:       | <p>Bazrafshan, Azam; Kerman University of Medical Sciences, HIV/STI Surveillance Research Center, and WHO Collaborative Center for HIV Surveillance, Institute for Futures Studies in Health, Sadeghi, Azadeh; Kerman University of Medical Sciences, HIV/STI Surveillance Research Center, and WHO Collaborative Center for HIV Surveillance, Institute for Futures Studies in Health,; Kerman University of Medical Sciences, Deputy of Health, Department of Communicable Diseases</p> <p>Bazrafshan, Maliheh Sadat; Kerman University of Medical Sciences, HIV/STI Surveillance Research Center, and WHO Collaborative Center for HIV Surveillance, Institute for Futures Studies in Health, Mirzaie, Hossein; Kerman University of Medical Sciences, HIV/STI Surveillance Research Center, and WHO Collaborative Center for HIV Surveillance, Institute for Futures Studies in Health, Shafiee, Mehdi; Kerman University of Medical Sciences, HIV/STI Surveillance Research Center, and WHO Collaborative Center for HIV Surveillance, Institute for Futures Studies in Health,; Kerman University of Medical Sciences, Deputy of Health, Department of Communicable Diseases</p> <p>Geerts, Jaason; Canadian College of Health Leaders; City University of London, Bayes Business School</p> <p>Sharifi, Hamid; Kerman University of Medical Sciences, HIV/STI Surveillance Research Center, and WHO Collaborating Center for HIV Surveillance, Institute for Futures Studies in Health,</p> |
| <b>Primary Subject Heading</b>: | Public health                                                                                                                                                                                                                                                                                                                                                                                                                                                                                                                                                                                                                                                                                                                                                                                                                                                                                                                                                                                                                                                                                                                                                                                                                                                                                                                                                                                                                                                                                      |
| Secondary Subject Heading:      | Health policy                                                                                                                                                                                                                                                                                                                                                                                                                                                                                                                                                                                                                                                                                                                                                                                                                                                                                                                                                                                                                                                                                                                                                                                                                                                                                                                                                                                                                                                                                      |
| Keywords:                       | COVID-19, Health policy < HEALTH SERVICES ADMINISTRATION & MANAGEMENT, INFECTIOUS DISEASES                                                                                                                                                                                                                                                                                                                                                                                                                                                                                                                                                                                                                                                                                                                                                                                                                                                                                                                                                                                                                                                                                                                                                                                                                                                                                                                                                                                                         |
|                                 |                                                                                                                                                                                                                                                                                                                                                                                                                                                                                                                                                                                                                                                                                                                                                                                                                                                                                                                                                                                                                                                                                                                                                                                                                                                                                                                                                                                                                                                                                                    |

SCHOLARONE™  
Manuscripts



1  
2  
3  
4  
5  
6  
7  
8  
9  
10  
11  
12  
13  
14  
15  
16  
17  
18  
19  
20  
21  
22  
23  
24  
25  
26  
27  
28  
29  
30  
31  
32  
33  
34  
35  
36  
37  
38  
39  
40  
41  
42  
43  
44  
45  
46  
47  
48  
49  
50  
51  
52  
53  
54  
55  
56  
57  
58  
59  
60



I, the Submitting Author has the right to grant and does grant on behalf of all authors of the Work (as defined in the below author licence), an exclusive licence and/or a non-exclusive licence for contributions from authors who are: i) UK Crown employees; ii) where BMJ has agreed a CC-BY licence shall apply, and/or iii) in accordance with the terms applicable for US Federal Government officers or employees acting as part of their official duties; on a worldwide, perpetual, irrevocable, royalty-free basis to BMJ Publishing Group Ltd ("BMJ") its licensees and where the relevant Journal is co-owned by BMJ to the co-owners of the Journal, to publish the Work in this journal and any other BMJ products and to exploit all rights, as set out in our [licence](#).

The Submitting Author accepts and understands that any supply made under these terms is made by BMJ to the Submitting Author unless you are acting as an employee on behalf of your employer or a postgraduate student of an affiliated institution which is paying any applicable article publishing charge ("APC") for Open Access articles. Where the Submitting Author wishes to make the Work available on an Open Access basis (and intends to pay the relevant APC), the terms of reuse of such Open Access shall be governed by a Creative Commons licence – details of these licences and which [Creative Commons](#) licence will apply to this Work are set out in our licence referred to above.

Other than as permitted in any relevant BMJ Author's Self Archiving Policies, I confirm this Work has not been accepted for publication elsewhere, is not being considered for publication elsewhere and does not duplicate material already published. I confirm all authors consent to publication of this Work and authorise the granting of this licence.

1  
2  
3  
4  
5  
6  
7  
8  
9  
10  
11  
12  
13  
14  
15  
16  
17  
18  
19  
20  
21  
22  
23  
24  
25  
26  
27  
28  
29  
30  
31  
32  
33  
34  
35  
36  
37  
38  
39  
40  
41  
42  
43  
44  
45  
46  
47  
48  
49  
50  
51  
52  
53  
54  
55  
56  
57  
58  
59  
60

### Health risk communication and infodemic management in Iran: development and validation of a conceptual framework

**Authors:** Azam Bazrafshan<sup>1</sup>, Azadeh Sadeghi<sup>1,2</sup>, Maliheh Sadat Bazrafshan<sup>1</sup>, Hossein Mirzaie<sup>1</sup>, Mehdi Shafiee<sup>1,2</sup>, Jaason M. Geerts<sup>3,4</sup>, Hamid Sharifi<sup>1\*</sup>

<sup>1</sup>HIV/STI Surveillance Research Center, and WHO Collaborative Center for HIV Surveillance, Kerman University of Medical Sciences

<sup>2</sup>Department of Communicable Diseases, Deputy of Health, Kerman University of Medical Sciences, Kerman, Iran

<sup>3</sup>Honorary Visiting Fellow, Bayes Business School, University of London, UK.

<sup>4</sup>Director of Research and Leadership Development, The Canadian College of Health Leaders, Ottawa, Canada.

\*Corresponding author: Hamid Sharifi (Sharifihami@gmail.com)

#### Abstract

**Objective:** the COVID-19 pandemic exposed significant gaps in Iran's and other health systems' risk communication. The accompanying infodemic undermined policy responses, amplified distrust in government, and reduced adherence to public health recommendations among the Iranian population. This study aimed to develop a conceptual framework for health risk communication and infodemic management (RCIM) during epidemics and health emergencies in Iran that could have potential applications in other contexts.

**Design:** this study was designed in two phases. Phase 1 involved semi-structured qualitative interviews with key informants to explore effective RCIM strategies across public health settings in Iran and to develop a conceptual framework. Phase 2 involved revising the framework based on feedback from an online expert panel regarding its comprehensiveness and validity.

**Setting:** provincial/national public health settings in Iran.

**Participants:** twenty key informants from provincial and national public health authorities who contributed to COVID-19 response programs participated in interviews. Nine experts from diverse academic disciplines, provincial and national settings, and geographical locations participated in an online expert panel.

**Results:** the conceptual model was created based on qualitative interviews and expert panel discussions and was structured according to four pillars of the World Health Organization (WHO) health system framework: leadership and governance, information, health workforce, and financial resources, along with media and community. Leadership and governance, including trustworthy leaders, were recommended as the foundation for developing RCIM in Iran. Developing an official strategy with information infrastructures, including high-quality surveillance systems, identified personnel and training for specialists among the health workforce, financial resources, communication channels, and community engagement, were recognised as other dimensions for developing health risk communication in Iran.

**Conclusion:** the proposed framework represents a step toward establishing a national health risk communication strategy in Iran. Further validation of the conceptual framework and experiments on how it could potentially influence policy and practice are recommended. This model has the potential to be applied in other contexts in its current form or as the foundation for customised local versions.

### Keywords

risk communication, leadership, infodemic, COVID-19, emergency preparedness, crisis response

### Strengths and limitations of this study

- This study consolidates insights from the field experiences of public health professionals across provincial and national settings in risk communication and infodemic management (RCIM) during the COVID-19 pandemic in Iran. Investigating the experiences and perceptions of academics, health professionals, and policy-makers enhances the validity of the results by including diverse perspectives on the topic of RCIM, and strengthens the proposed framework's credibility by providing a comprehensive understanding of its applicability in provincial and national public health settings.
- This study presents a novel conceptual framework, validated through full consensus by a panel of experts, for risk communication and infodemic management during epidemics and health emergencies in Iran.
- The qualitative nature of our study and the focus on one country may limit the perceived validity, however, involving two phases of diverse experts increases the potential relevance of the framework to other contexts

### Introduction

The COVID-19 pandemic has changed our world, having affected every sector significantly, including health, education, economic, social, cultural, and informational. One of the social repercussions of the pandemic has been the constant spread through various media of overwhelming volumes of information, particularly concerning health, public health, government directives, and related issues. Much of this has been "misinformation" and "disinformation", both of which refer to incorrect or misleading content, the difference being the intentionality of those engaging in disinformation to cause harm, whereas misinformation is non-malicious but still potentially dangerous. Sources of mis- and disinformation range from non-stringently reviewed rapid academic publications with non-credible or flawed methodologies - and thereby dubious conclusions (misinformation), to "fake news" through anonymous social media posts and intentionally misleading messaging by government officials (disinformation) (1).

False information, combining accidental and intentional, has contributed significantly to misguided health policies and to a host of deleterious consequences for individual and population health (2, 3). This phenomenon is called an "infodemic". The World Health Organization (WHO) defines an infodemic as, "the widespread distribution of false or misleading information in digital and physical environments during a disease outbreak" (4). Without robust systemic safeguards in place, an infodemic can make communities, jurisdictions, and whole populations more vulnerable to disease infection and their side effects, as well as to other related harms (5). Information overload, including the infodemic, during the COVID-19 pandemic, has represented a parallel pandemic whose transmission rate is much faster than the disease itself, since rampant erroneous and prejudicial information can trigger the spread of wild and accelerated waves of fear and defiance in the general population (6). In Iran, for example, there is evidence, though limited, that the infodemic spread widely through social media during the pandemic was associated with significant COVID-19 vaccine hesitancy rates (7, 8), substantial uptake of traditional and complementary medicine products (9), and poor adherence to preventive measures, such as masking, in the general population (10). This escalation reinforces the importance of infodemic management in Iran.

Infodemics can severely change a pandemic's course by undermining public health and government recommendations and by diminishing population and community adherence to public health interventions such as, masking, social distancing, and vaccination.. Economically disadvantaged countries are at higher risk of infodemics than developed countries, due to a range of inequalities (11). Lower rates of health literacy, limited

1  
2  
3 access to reliable health information, and minimal public trust in public health authorities (11) can make people  
4 from underdeveloped and developing countries more susceptible to fake news and misinformation (12, 13). This  
5 vulnerability is compounded by further inequalities in terms of comparatively limited healthcare infrastructure  
6 and reduced access to healthcare facilities and public health professionals, which make people from these  
7 countries more prone to sporadic and ill-advised health and public health behaviours (14). In this context, the  
8 infodemic can pose a greater threat to populations in underdeveloped and developing countries during epidemics  
9 and health emergencies (15) by negatively influencing public risk perceptions and by undermining evidence-based  
10 policy creation and national and regional emergency responses (16-18). These hindrances can increase the spread  
11 and burden of the pandemic and widen global health disparities.

12  
13  
14  
15  
16 Infodemics have become a global phenomenon, impacting citizens in every country (19, 20). Addressing them is a  
17 new challenge and priority in managing and responding to epidemics and health emergencies. To understand and  
18 counter the rapidly changing nature of the COVID-19 infodemic and to mitigate its negative effects, such as the  
19 further spread of misinformation, several novel strategies and initiatives have been established across public  
20 health settings globally. The WHO has been widely respected for developing highly credible guidelines and  
21 initiatives to combat misinformation and infodemic management across the world (21). From early in the COVID-  
22 19 response, the WHO began to develop international strategies for infodemic management, in cooperation with  
23 other organisations, including the US Center for Disease Control and Prevention (CDC) and the Africa Centre for  
24 Disease Control and Prevention. To track and address misinformation surrounding COVID-19 and HIV, UNAIDS and  
25 the Africa CDC have been operating a rumour management system—software that uses machine learning,  
26 combined with human expertise, to collect and analyse rumour data from open-source traditional media (web-  
27 based, news broadcasts), as well as social media (Facebook, Twitter, WhatsApp). The system enables the  
28 identification of false and misleading information related to COVID-19 and HIV (21). In addition, the WHO  
29 developed a framework for infodemic management through crowd-sourcing and online consultation with a wide  
30 range of global public health professionals (22). Multiple countries like Ghana have taken steps to identify, analyse,  
31 and respond to COVID-19 and vaccine-related misinformation (23). These initiatives are helpful foundations for  
32 further infodemic management strategies.

33  
34  
35  
36  
37  
38  
39 Risk communication and infodemic management (RCIM) are the core of risk management and effective responses  
40 to epidemics and health emergencies (24). According to Eysenbach (2020), there are four pillars of infodemic  
41 management: information monitoring, building health and e-health literacy in the general population,  
42 consolidating and disseminating credible information, including by accelerating the academic peer-review process,  
43 to ensure accurate and timely knowledge translation, and minimising factors, such as political or commercial  
44 agendas, that can distort or distract from evidence-based guidance or strategies (25). Combating mis- or  
45 disinformation for populations is as critical as ensuring much-needed medical equipment and supplies for health  
46 workers are readily available (26). In underdeveloped and developing countries, given their existing health  
47 information inequalities and public health vulnerabilities, customized RCIM approaches are needed to combat  
48 infodemics and to reduce their effects on population health (27). In particular, engagement and collaboration with  
49 local communities and leaders and stricter public health regulations are necessary (27). While some contexts may  
50 be more susceptible to the dangerous potential impacts of mis- and disinformation, none is immune, and the  
51 consequences of failing to tackle it directly and strategically can be dire.

52  
53  
54  
55  
56  
57 The purpose of this study was to build on and extend previous conceptualisations of RCIM capacity building by  
58 creating a conceptual framework of RCIM in Iran. To achieve this, we applied a systems thinking lens, since the  
59 pandemic demonstrated that not only can health emergencies affect all people and sectors, but that addressing  
60

1  
2  
3 infodemics requires more than just public health messaging. Along with potential benefits for other sectors, robust  
4 national and regional RCIMs can have a significant positive impact on health systems, those who bear the brunt of  
5 health emergencies. The WHO describes a health system as a set of interconnected building blocks that are  
6 essential to health system functioning. The blocks are: service delivery, health workforce, health information  
7 systems, access to essential medicines, financing, and leadership/governance, with the latter being central to all.  
8 It is essential that each of these interconnected elements are addressed concomitantly in response to changing  
9 population health needs and inequalities, and to epidemics and health emergencies (28). This multifaceted  
10 understanding of health systems, along with considerations for other related sectors, is vital to effective RCIM  
11 strategies, since mis- and disinformation can affect those in all aspects of society. The nature of health  
12 emergencies requires that policy and communications strategy recommendations should be gathered from a  
13 diverse group of actors with relevant RCIM expertise, including researchers, educators, advocates, practitioners,  
14 funders, private sector representatives, community representatives, government officials, policymakers, and  
15 various trusted international experts and representatives. Leaders from across sectors should also collaborate with  
16 public health and with each other to integrate RCIM strategies effectively to improve the health of all people and  
17 communities (29, 30). Applying these diverse perspectives and the systems thinking approach can enhance RCIM  
18 policies, strategies, and activities nationally, regionally, and locally and can lead to improved relevant health  
19 outcomes during epidemics and health emergencies (31).

## 25 26 **Methods**

27 This sequential, mixed-methods exploratory study was conducted in two phases from October to December 2022.  
28 Phase 1 involved semi-structured interviews with key informants from provincial and national public health  
29 authorities to inform the creation of an initial framework of key RCIM components across settings. Phase 2  
30 involved an online panel of experts from relevant scientific domains to validate the conceptual framework's  
31 validity, credibility, and transformability (32, 33). We then revised the framework based on the panel's feedback  
32 (Figure 1). This study followed the Standards for Reporting Qualitative Research (SRQR) checklist (34).

### 35 36 **Phase 1: semi-structured interviews**

37  
38 Phase 1 involved semi-structured interviews with a purposive sample of 20 Iranian public health professionals  
39 across provincial and national health authorities. Study participants included stakeholders, academics, decision-  
40 makers, and leaders with expertise in community health, epidemiology, public health, social medicine, health  
41 communication, and sociology. Participants were from eight pre-specified provinces: Kerman, Tehran, Fars,  
42 Isfahan, Mazandaran, West-Azerbaijan, Kermanshah, and Sistan va Baloochestan. These provinces were initially  
43 selected to involve a representative sample of the Iranian population with diverse social, geographical, and cultural  
44 characteristics. Inclusion criteria were: 1) having at least one year of experience in either COVID-19 prevention  
45 and control programs or decision-making in provincial or national public health settings, and 2) willingness to  
46 participate in the study.

47  
48 An interview guide was developed according to previous studies (Appendix 1). The interview guide focused on the  
49 processes, infrastructures, challenges encountered, and best practices relevant to RCIM during the COVID-19  
50 pandemic in Iran. The interview guide was assessed beforehand by two expert reviewers. It was subsequently pre-  
51 tested with three target population members before the implementation.

52  
53 The interviews followed a semi-structured design, allowing for variations of the order of the questions and follow-  
54 up questions based on participant responses. The objectives and the activities that were involved in the study  
55 were explained to the participants. The principal investigator's contact details were provided, and participants'

1  
2  
3 confidentiality was guaranteed. Written consent was sought before the interview, and the participants were asked  
4 to email the completed form to the principal investigator (Appendix 2). An experienced interviewer with a  
5 background in qualitative research and interviewing expertise conducted the interviews in the Farsi language. Due  
6 to COVID-19 social distancing, all interviews were conducted by telephone, audio-recorded, and transcribed  
7 verbatim. Interviews ranged between 20–55 minutes (mean = 34 minutes). Interviews lasted until the researchers  
8 realised they had reached content saturation.  
9  
10

11  
12 To analyse the interview data, all interviews were transcribed verbatim. Then one of co-authors extracted  
13 concepts and open codes using Braun and Clarke’s framework for thematic analysis of qualitative data (35) to the  
14 interview transcripts. The authors define thematic analysis as, “the process of identifying patterns or themes  
15 within qualitative data” (p. 78). Their framework involves six steps: becoming familiar with the data, generating  
16 initial codes, searching for themes, reviewing themes, defining themes, and writing up.  
17 The initial set of open codes, themes, and sub-themes was discussed by participants and subsequently reviewed  
18 by the entire research team to improve the credibility and trustworthiness of the qualitative study. We used  
19 MAXQDA 12 (VERBI GmbH, USA) for manual coding and content analysis.  
20

21  
22 Based on the themes identified from the qualitative interviews and subsequent inspections, we created an initial  
23 set of 33 key RCIM strategies and organized them according to four of the pillars of the WHO model of the health  
24 systems, along with media and community (28). This initial set of components served as the basis for discussion  
25 with, and validation by, the expert panel in Phase 2 and consequently, the conceptual model.  
26

## 27 **Phase 2: expert panel validation**

28  
29 Phase 2 involved a group of nine experts selected through purposive sampling to validate and prioritise key  
30 components of the initial RCIM model and to evaluate its completeness and validity (32, 33). The panel included a  
31 diverse set of stakeholders, academics, decision-makers, leaders from the various communities, and national  
32 public health leaders. The inclusion criteria for this phase were: 1) having at least three years of professional  
33 experience or established research expertise in the fields of public health, epidemiology, crisis management,  
34 infodemiology, social media studies, or health communication; and 2) willingness to participate in the study.  
35 Potential panel members (n = 9) were identified through their academic or professional roles in health risk  
36 communication or risk management activities across provincial or national health authorities during the COVID-  
37 19 pandemic. Prospective contributors were given a short statement of the study’s purpose and design and were  
38 invited by email to participate in the panel discussion. During the discussion, panellists engaged based on their  
39 assessments of the initial conceptual model and suggested additions, deletions, and modifications, with the aim  
40 of informing a highly complete and credible model of essential components of an RCIM model for the country. As  
41 mentioned previously, this validation by experts was also intended to augment the quality, reliability, and validity  
42 of the model (32, 33).  
43  
44

45  
46  
47  
48 Following this phase, several revisions were made to the original conceptual model, but no factor was deemed  
49 required for exclusion. The required level of consensus for each component in this phase was a minimum of 75%  
50 agreement.  
51

## 52 **Patient and Public Involvement Statement**

53  
54 No patients or community members were involved in this study.  
55  
56  
57  
58  
59  
60



## Results

### Phase 1: semi-structured interviews

#### Participants

Most participants were men (n=19, 95%), aged 51-60 years old (n=11, 55%), from medical and public health disciplines (n=17, 85%), who work as a provincial or national health officer (n=14, 70%). Participants were mostly from Tehran (n=7, 35%) and Kerman provinces (n=5, 25%) (Table 1).

**Table 1:** Demographic characteristics of the participants in the interviews (Phase 1)

| Demographic characteristics                | Frequency (%) |
|--------------------------------------------|---------------|
| <b>Residence at the time of interviews</b> |               |
| Tehran                                     | 7(35)         |
| Kerman                                     | 5 (25)        |
| Fars                                       | 2 (10)        |
| Isfahan                                    | 2 (10)        |
| Kermanshah                                 | 1 (5)         |
| Mazandaran                                 | 1 (5)         |
| Sistan va Baluchestan                      | 1 (5)         |
| West Azerbaijan                            | 1 (5)         |
| <b>Age</b>                                 |               |
| 40-49                                      | 6 (30)        |
| 50-59                                      | 11 (55)       |
| 60≥                                        | 3 (15)        |
| <b>Gender</b>                              |               |
| Men                                        | 19 (95)       |
| Women                                      | 1 (5)         |
| <b>Academic Discipline</b>                 |               |
| Epidemiology                               | 6 (30)        |
| General medicine                           | 4 (20)        |
| Sociology                                  | 3 (15)        |
| Health policy                              | 2 (10)        |
| Infectious disease                         | 2 (10)        |
| Social medicine                            | 2 (10)        |
| Health education & promotion               | 1 (5)         |

The analysis of the qualitative data collected during the key informant interviews revealed 948 open codes and 84 sub-themes. Sub-themes were subsequently classified into 33 components (Appendix 3).

The next step involved organising these components according to six categories representing a combination of the WHO model (24) and key aspects of the Iranian health system: leadership and governance, information, health workforce, financial resources, media, and community. The results formed the initial RCIM conceptual model.

1

2

3

### Theme 1: Leadership and Governance

4 Leadership and governance are at the heart of the WHO model of health systems (28) and Dr. Tedros Ghebreyesus,  
5 Director-General of the WHO, said in the early months of the pandemic, "The greatest threat we face now is not  
6 the virus itself, it's the lack of global solidarity and global leadership" (36). Similarly, in an international study of  
7 crisis leadership featuring 32 co-authors from 17 countries, Geerts et al. (2021) highlighted that effective  
8 leadership, trust in leaders through transparent decision-making, communication, and accountability are vital to  
9 successful public health strategies (32, 33).

12

13

14 These examples reinforce the finding in our study that every respondent mentioned leadership and governance  
15 as essential foundations for the RCIM model. Seven respondents emphasised transparency in decision-making,  
16 effective communication, and accountability as important characteristics of effective leadership and governance.  
17 According to these respondents, a lack of transparency and accountability among Iranian health officials and  
18 government authorities were among the country's substantial weaknesses in risk communication and had adverse  
19 consequences. Thirteen respondents suggested that senior public health officials intentionally caused non-  
20 transparent information communication during the COVID-19 pandemic, motivated by financial and other  
21 competing interests, which, they suggested, eroded public trust significantly. Similarly, regarding sources of false  
22 messaging, seven respondents indicated that pharmaceutical companies were a major source of spreading  
23 misinformation during the pandemic. These respondents suggested that public health officials to allow their  
24 financial and competing interests, including those related to pharmaceutical companies, to deter them from  
25 spreading credible information about the efficacy of some new and underdeveloped medications and vaccines.  
26 One respondent expanded a perception that many health officials were among shareholders of the  
27 pharmaceutical industry, they advertised some drugs or public health products and subsequently caused a fake  
28 and unrealistic demand among the population.

33

34 Almost all respondents (n =18) emphasised that the health system needs a robust risk communication strategy  
35 and increased infodemic management capacity by developing infrastructures for monitoring the public's risk  
36 perception, knowledge and attitudes, communicating with the public, and providing clear guidance through  
37 various media based on the best available science. Increased RCIM capacity would enable early detection of  
38 outbreaks of potentially harmful mis- and disinformation, and quick responses to counter falsehoods with facts or  
39 other reliable information in a targeted way for each audience. One respondent suggested that building capacity  
40 should involve designing an infodemic management system that defines national and provincial responsibilities  
41 based on lessons learned from credible global guidelines, national and regional successful strategies, challenges,  
42 and failures, as well as leading practices, locally and elsewhere. This respondent added that the system should  
43 include a national independent core rapid response team with clear roles, protocols, and accountabilities to  
44 collaborate with communities to screen and identify their needs, concerns, and misinformation sources, to lead  
45 quick responses the potential risks, and to prevent or mitigate the viral spread of mis- and disinformation across  
46 the communities. Similarly, six respondents proposed developing, implementing, evaluating, and revising  
47 communication policies and strategies to confront potential risks. According to these respondents, the lack of  
48 national and provincial policies and programs for RCIM severely inhibited the national COVID-19 control and  
49 management efforts. Four respondents argued that the government's poor management of the COVID-19  
50 infodemic, poor communication with the public and other stakeholders, and a lack of national and provincial  
51 strategies to address misinformation were major shortcomings of risk communication and infodemic management  
52 in Iran.

58

59

60

1

2

3 To optimize RCIM strategies, it is crucial to involve representatives from multiple sectors and the community  
4 representatives. Eleven respondents indicated that top-down public health initiatives that lacked community-  
5 based customisation and approaches were among the major barriers to acceptance of COVID-19 prevention and  
6 control interventions during the pandemic. Multi-sector and community involvement could also potentially  
7 improve community members' motivation to participate actively in information communication and management  
8 of infodemics. For example, one respondent described how social influencers in community-based approaches,  
9 such as that in Safiran-e-Salamat, Tehran, served as facilitators for effective risk communication and infodemic  
10 management across provincial settings.

13

14

15 Ineffective use of institutional and provincial infrastructures and capacities and lack of crowdsourcing were cited  
16 by four participants as major barriers to effective infodemic management during the COVID-19 pandemic. These  
17 respondents elaborated that medical universities and faculty within the provinces were isolated from the national  
18 health authorities and not supported by the Ministry of Health in planning and decision-making. These two  
19 respondents recommended establishing official networks of experts in diverse areas and practitioners to share  
20 experiences, challenges, and best practices of information communication during the potential risks and increase  
21 capacity.

23

24

25 Along with trustworthy public health guidance and recommendations, two respondents stated that providing all  
26 people with tools for filtering, assessing, and fact-checking information is essential to combat misinformation  
27 during the pandemic and health emergencies. Five respondents believed that using a well-known and reliable  
28 communication channel and technology-based interventions would maximise the spread of valid information and  
29 impact communication efforts and strategies.

31

## 32 **Theme 2: Information**

33 Developing a network platform to systematically collect, analyse, and interpret epidemiologic data from the  
34 community and quickly disseminate the key findings was considered an important characteristic of risk  
35 communication by fourteen respondents. These respondents emphasised that a lack of access to real-time, valid,  
36 and high-quality data about the incidence, mortality, and burden of the COVID-19 disease in different provinces  
37 intensified the potential risk and spread of misinformation among the population.

39

40

41 Similarly, seven respondents indicated that a lack of access to high-quality surveillance data for research activities  
42 and to inform responses to potential and emergent challenges reduced the reliability of information and  
43 recommendations and transparency of government decisions. Consequently, it raised dramatic social concerns  
44 about the government's ability to estimate the spread of the disease and to anticipate and evaluate the effect of  
45 specific policies on population health.

47

48

49 In addition to data quality issues, two respondents suggested that the lack of substantial resources to handle the  
50 multiplication of data sources and information producers, to monitor disease trends regularly, and to appraise the  
51 quality of data sources were major barriers to the effective use of surveillance data for decision-making during the  
52 pandemic.

53

54

55 One respondent stated that some politicians, health officials, and media misinterpreted and selectively reported  
56 data according to their own financial, commercial, and political interests, which he considered a major source of  
57 misinformation during the pandemic. Two respondents argued that effective knowledge translation of high-quality  
58 data is required to minimise the spread of misinformation across different sectors and communities, since people's  
59 political, commercial, and financial interests can lead them to distort scientific messages.

60

1  
2  
3  
4  
5  
6  
7

Finally, three respondents reported that these data issues contributed to a lack of evidence-based policies and practices, which severely inhibited effective risk communication and infodemic management.

### 8 **Theme 3: Health workforce**

9 All respondents highlighted the need for well-trained specialists in various organisations with a mix of skills that  
10 can contribute to risk communication and infodemic management activities, as well as additional training for all  
11 health workers.

12  
13  
14 Six respondents promoted the benefits of involving public health agencies, epidemiologists, data scientists, and  
15 sociologists who have unique expertise and credibility to guide policies, strategies, and risk communication and  
16 infodemic management, in collaboration with health workers. However, all respondents agreed that the Iranian  
17 scientists and experts have not helped substantially to prevent misinformation and to mitigate the effects of the  
18 infodemic. Further, three respondents suggested that, in some cases, scientists and academic experts in infodemic  
19 management were considered sources of misinformation, seen as contributing to the infodemic trends by  
20 publishing low-quality scientific papers and providing non-credible, sensational, or exaggerated information about  
21 new treatments.

22  
23  
24 To gather relevant data and to disseminate evidence-based guidance, twelve respondents highlighted the need to  
25 involve professional councils, NGOs, interested experts, and health volunteers as additional workforce sources to  
26 improve the speed and effectiveness of the response to the infodemic.

27  
28  
29 Three respondents identified a key gap in RCIM: a lack of qualified and well-trained spokespersons in public health  
30 and health organisations, which, they suggest, greatly diminished the quality of risk communication activities  
31 during the pandemic. Four respondents referenced a range of competencies necessary to improve the quality of  
32 the health workforce education and practice, which can be used to select potential candidates for RCIM roles and  
33 to design educational courses and curricula to enhance their ability to support health emergency response  
34 effectively.

### 35 36 37 38 39 **Theme 4: Financing**

40 Three respondents highlighted the importance of effective financial resource allocation to risk communication and  
41 infodemic management to support data collection and analysis and communication strategies. One respondent  
42 argued that multi-sector collaborations could reduce the risk of underfunding communication responses. Using  
43 technology-based interventions, such as text-messaging approaches, could improve the cost-effectiveness of  
44 communication strategies.

### 45 46 47 48 **Theme 5: Media**

49 All respondents mentioned characteristics related to media. Two respondents believed that given the broad  
50 coverage and penetration of radio and television (TV) as dominant communication channels in most parts of the  
51 country, involvement of trustworthy spokespersons in, and collaboration with, mass media, could improve the  
52 effectiveness of risk communication strategies. However, the respondents elaborated that the weak contribution  
53 of these media in RCIM was an obstacle to preventing misinformation. Even worse, nine respondents argued that  
54 TV and other mass media actually contributed to the COVID-19 infodemic. According to these respondents,  
55 broadcasting news reports that included misleading and low-value information, interviews with non-experts, and  
56 flagrant criticisms or debates about the performance of public health agencies reduced public trust and prompted  
57 many people and communities to rely more on informal and social media channels.

1

2

3

4

5 Three respondents added the need to improve government and health authorities' websites to disseminate real-  
6 time and high-quality information, since many consider them the source of credible information. Additionally, six  
7 respondents advocated social media platforms as important communication channels for most communities to  
8 aid the acceptance of public health interventions. Three respondents elaborated that reduced public trust in  
9 formal and government communication channels caused many people to rely instead on social media platforms,  
10 viewing them as more trustworthy. For example, according to two respondents, the dissemination of valid and  
11 high-quality data through social media channels influenced the impact of local interventions and improved  
12 vaccination coverage for vulnerable and ethnic populations, particularly in Sistan-va-Baluchestan and West  
13 Azerbaijan. These respondents explained that, due to higher accessibility, social media platforms were highly  
14 utilised by younger adults and geographically distanced locations and, therefore, effective in improving the speed  
15 and effectiveness of interventions among members of these populations.

16

### 17 **Theme 6: Community**

18

19 Eight respondents reinforced the importance of involving the community in risk communication and infodemic  
20 management in two ways. First, by understanding their diverse demographic, social, economic, and cultural  
21 compositions and by identifying their information needs, preferred media, and key influencers. Second, by  
22 listening to their concerns, sharing key data and evidence-based recommendations with them, and incorporating  
23 their input transparently into important, relevant decisions. However, four respondents suggested that the lack of  
24 community-centred approaches reduced the effectiveness of risk communication efforts during the COVID-19  
25 pandemic in most Iranian provincial settings. Three respondents recommended priority training in critical thinking,  
26 media, and health literacy for community leaders in risk communication and infodemic management to improve  
27 their engagement, active contribution, and effectiveness. According to these respondents, well-informed,  
28 engaged, and enabled communities can minimise misinformation and infodemic consequences and develop their  
29 own local solutions. One respondent expressed that this kind of respectful, reciprocal relationship with  
30 communities could rebuild and maintain public trust in public health agencies, health professionals, and  
31 government authorities and could also maximise social cohesion and local capacity successfully respond to  
32 potential risks during the crisis.

33

### 34 **Phase 2: expert panel validation**

35

36 In this phase, the completeness and trustworthiness of the proposed conceptual model of RCIM in Iran was  
37 discussed by the online expert panel until consensus was achieved by all panel members (100% agreement) (Figure  
38 1).

39

40 Figure 1: a conceptual model of components and infrastructures of health risk communication and  
41 infodemic management system in Iran

42

### 43 **Discussion**

44

45 This study, conducted during the COVID-19 pandemic, was inspired by an awareness of two aspects of  
46 the global experience. The first is the extent to which infodemics can influence the course of large-scale  
47 health emergencies, given the global impact that the COVID-19 infodemic has had on individual and  
48 population health (2, 3). The term "infodemic" refers to the profusion of recurring waves of information  
49 of overwhelming volume and predominantly unclear and/or mixed credibility, including disinformation,  
50 messaging intended to deceive. Infodemics can erode the quality and effectiveness of policy and strategy  
51 decisions. They can also intensify community and population-level distrust in government and public  
52 health officials and experts, including their recommendations, which can drastically undermine national

53

1  
2  
3 and local efforts to effectively mitigate the spread of the disease. As people's faith in official sources  
4 diminishes, the likelihood of them being influenced by alternatives increases, and the escalation of  
5 rumours and fear exacerbates. Broadcasts of incorrect information through TV, radio, newspapers, and  
6 other mainstream and social media, and even through academic publications, can contribute to  
7 widespread non-adherence to public health directives, thereby perpetuating the spread, impact, and  
8 burden of a pandemic.  
9  
10

11  
12 Infodemics can have increasingly devastating effects in economically disadvantaged countries, due to a  
13 wide range of inequalities (11), which can make people local populations more susceptible to fake news  
14 and misinformation (12, 13). This vulnerability is compounded by further inequalities in terms of  
15 healthcare infrastructure, access to healthcare facilities, and health professionals (14). Evidence suggests  
16 that, in Iran, the infodemic spread, largely through social media, contributed to several adverse outcomes  
17 in the general population (32). The speed, scale, and potential lethal consequences of infodemics are why  
18 they are considered parallel pandemics, which require a dedicated, strategic, expertise-informed  
19 response to allay.  
20  
21  
22

23  
24 The second inspiration for the study was an appreciation for the vital mitigating role that effective risk  
25 communication information management (RCIM) can play in pandemic and infodemic response.  
26 Understanding the sources of mis- and disinformation and rapid, effective government and public health  
27 response, in collaboration with multi-sector and community leaders, to evolving risks, along with targeted  
28 strategies, can mitigate potential negative ramifications.  
29  
30

31  
32 The purpose of this research was to support increased national and local RCIM capacity in Iran and beyond  
33 by creating a unique conceptual model of evidence-, expert-, and experience-informed strategies for  
34 RCIM during epidemics and health emergencies. To create the model, we applied a systems thinking lens,  
35 since infodemics and their effects reside within multi-sectoral complex systems involving interactions and  
36 actors from all aspects of society. This perspective considers how to most effectively engage with  
37 potential audiences and diverse stakeholders, including the community, scientists and experts,  
38 government and public health officials, health workforce, pharmaceutical industries (private sector), and  
39 others, through physical and virtual communication channels (Figure 2). This comprehensive approach  
40 can enhance the potential for sectoral and provincial health authorities to improve RCIM activities and  
41 relevant health outcomes during epidemics and health emergencies. Given this perspective, following  
42 leading international pandemic research (27), we gathered two stages of input and validation from  
43 diverse groups of those with expertise and experience in public health and various related sectors and  
44 disciplines.  
45  
46  
47  
48  
49

50  
51 Figure 2 Components of the COVID-19 risk communication and infodemic management in Iran, source:  
52 own production  
53

54  
55 The model presented here is organised according to four of the pillars of the WHO model of the health  
56 systems, along with media and community (28), and it is reinforced by the full consensus of an expert  
57 panel in terms of its quality, completeness, and validity. While the model was developed for the Iranian  
58 context, the intention was for it to have potential application in other contexts to decrease the spread  
59 and burden of future health emergencies and to minimise global health disparities.  
60



1  
2  
3  
4 What follows are some insights on, and priority points for, effective RCIM that emerged from the  
5 qualitative interviews and expert panel discussions.  
6  
7

8 Our findings support the vital importance and potential impact of establishing a robust, integrated,  
9 evidence-informed national RCIM strategy, with regional applications, to strengthen existing RCIM  
10 capacities to explore, track, monitor, respond, and adapt to the needs of each community. Our results  
11 also show that effective RCIM requires several essential components: an official RCIM strategy supported  
12 by dedicated personnel, infrastructure, financing, and resources, trustworthy leadership and governance,  
13 the expertise and capacity to inform policies and to gather, analyse, and communicate the best available  
14 information in real-time, effective messaging through mainstream and social media with local support,  
15 RCIM training for specialists among the healthcare workforce, and community engagement to maximise  
16 local outcomes.  
17  
18  
19

### 20 21 **Official RCIM strategy with dedicated personnel, infrastructure, financing, and resources**

22 Effective RCIM requires having an official strategy, based on a credible conceptual framework, which  
23 drove this study, and consolidated lessons learned locally and elsewhere. Aspects of the strategy need to  
24 evolve and adapt based on changing circumstances and it is essential that consideration is given to roles  
25 and customised approaches at the national, regional, and community levels. This should involve an official  
26 core national rapid response team with clear roles, protocols, resources, and accountabilities, along with  
27 regional chapters.  
28  
29

30  
31 Second, the strategy needs to be supported by the infrastructure, financing, and resources to operate  
32 effectively. Respondents in our study suggested that in Iran, however, funding to enhance RCIM system  
33 capacity in terms of infrastructure and personnel is poor and they indicated that the lack of direct funding  
34 hindered the risk communication support during the pandemic. Although there are media and public  
35 communication experts, the number of those available with expertise and training in responding to major  
36 health risks is critically limited. Underfunding RCIM appears to be a common challenge in many countries.  
37 Evidence from south-east Asia (37), for example, revealed that during the COVID-19 pandemic, few  
38 countries allocated resources to emergency risk communication. However, some specific areas have  
39 budgets, such as information education communication materials. Also, resource mobilisation and the  
40 use of non-governmental resources were reported as strategies to address this critical challenge within  
41 the country's national and provincial settings. Priority areas and optimal mobilisation and use of resources  
42 is an important consideration for further exploration.  
43  
44  
45  
46  
47

### 48 **Leadership and governanc**

49 The COVID-19 pandemic has highlighted the global importance of trustworthy and effective leaders who  
50 keep people at the forefront of their decisions, which they make transparently based on the best available  
51 evidence from a systems thinking perspective, and hold themselves accountable for outcomes (27).  
52 Leadership and governance are also at the heart of the WHO model of health systems (28). Similarly,  
53 every respondent in our study reinforced the fundamental importance to effective RCIM of leadership  
54 and governance.  
55  
56  
57  
58  
59  
60



1  
2  
3 Leadership-wise, effective RCIM response involves ensuring that the official RCIM strategy, personnel,  
4 infrastructure, and resources identified in the previous point are in place. But these are insufficient on  
5 their own.  
6  
7

8 Effective RCIM leadership and governance depends on government officials and public health and other  
9 leaders earning people's trust through their integrity and public- versus self-interest. If either of these are  
10 considered compromised, RCIM efforts are vastly undermined, as was seen during the pandemic in Iran.  
11 Leaders also earn trust by instilling confidence that, in a timely manner, they have the expertise and  
12 capacity to access and interpret the most credible information, operationalise an evidence-informed  
13 strategy and adapt it when necessary, and make and communicate transparent decisions, along with their  
14 rationale. Credible information should be actively gathered from many sources, including international,  
15 national, and local experts, leaders in all related sectors, and community leaders and representatives.  
16 Effective leaders understand that tailored, two-way communication according to an accurate  
17 understanding of each stakeholder's and community's preferences is crucial. This communication  
18 involves asking important questions, active listening, sharing information, providing clear  
19 recommendations, tools, and customised messaging, and engaging local support to lead RCIM. Finally,  
20 respondents indicated that leaders need to hold themselves publicly accountable for outcomes.  
21  
22  
23  
24  
25

26 Leaders' ability to deliver on their responsibilities requires the aforementioned strategy, personnel,  
27 infrastructure, and resources, as well as developing a network of diverse international, national, and local  
28 experts in various relevant disciplines, leaders from all sectors, RCIM specialists within the health  
29 workforce, and community leaders.  
30  
31  
32

### 33 **Information**

34 Effective RCIM relies on three approaches to information. The first is the expertise and capacity to, in a  
35 timely manner, proficiently screen, monitor, and verify the validity, relevance, and potential impact of  
36 available information from official and unofficial sources. The second is the ability to actively gather  
37 information from those with relevant expertise related to pandemic response and to RCIM strategies. The  
38 third is to communicate the most credible information to inform policymakers, government officials,  
39 public health, community leaders, and health and healthcare practitioners to equip them with the  
40 knowledge to create, implement, and adapt appropriate and effective strategies.  
41  
42  
43  
44

### 45 **Media and communications**

46 Combatting infodemics hinges on credible and strategic messaging through official sources, including  
47 government and public health websites, as well as through mainstream and social media, in collaboration  
48 with local representatives. The collaborative contribution of the government, public health, leaders in  
49 various sectors, experts, and community leaders in circulating health information is a key strategy to  
50 counter mis- or disinformation during health emergencies. Understanding the needs, perceptions,  
51 priorities, and concerns of key stakeholders across public and private settings and identifying different  
52 opportunities and strategies for their involvement are critical steps to developing and implementing risk  
53 communication policies and strategies.  
54  
55

56 Developing or sustaining reputed and well-trusted communication channels is critically required to  
57 maximise the effectiveness and impact of communication strategies. How the community perceives  
58 various epidemics and health emergencies, what they perceive to be their role, how they are influenced,  
59 and how their views tally with the biomedical approach, are not entirely investigated in the country.  
60

1  
2  
3 According to our findings, a lack of public trust in mass media and government channels directed Iranian  
4 citizens to the wide use of online social networks. Due to the dramatic reduction in social capita, most  
5 Iranians distrust governmental information sources, and this fact challenged the community's compliance  
6 with preventive behaviours (COVID-19 vaccination) during the COVID-19 pandemic. Lack of trust in the  
7 government as a source of information was reported globally in the existing literature. According to  
8 recent evidence, only 40% of the European citizens from the Economic Co-operation and Development  
9 countries participated in a survey and trusted their governments as sources of information about the  
10 Corona Virus (38). False claims about the activities, statistics, or policies of public and government  
11 authorities were reported as a major source of disinformation during the COVID-19 pandemic, suggesting  
12 that "governments have not always succeeded in providing clear, useful, and trusted information to  
13 address pressing public questions" (39). Meanwhile, disinformation and claims may also be falsely  
14 attributed to official and governmental sources, amplifying this problem. In this regard, delivering  
15 truthful, evidence-informed, and compelling information to various audiences through their preferred  
16 channels and understanding behavioural and psychological biases is recommended. This is especially  
17 important for young audiences, who tend to access news and information predominantly via social media  
18 platforms(40). It is, therefore, a critical issue for health risk communication and infodemic management  
19 to ensure key factual messages reach all audiences. It is also important to effectively leverage the channel  
20 through which various audiences are relayed since different groups are likelier to trust media outlets that  
21 align with their views.  
22  
23  
24  
25  
26  
27  
28  
29

### 30 **RCIM training for health workforce**

31 While some capacity-building workshops for health professionals were held during the COVID-19  
32 pandemic by the Ministry of Health and medical universities, they were largely been ad hoc, of short  
33 duration (less than a week), and of variable quality. Those trained have often been public health  
34 professionals who then move on to other areas of public health. A planned and institutionalised approach  
35 to capacity-building is required to have an adequate pool of trained experts for epidemics and health  
36 emergencies. Therefore, financial resources and building risk communication expertise are critical  
37 priorities for the country. Obtaining both these resources will require the endorsement of senior  
38 policymakers. Advocacy to policy-makers and key decision-makers on the role and impact of RCIM is very  
39 important.  
40  
41  
42  
43

### 44 **Training**

45 RCIM is a broad and multi-disciplinary field involving health communication, health education, public  
46 affairs, behaviour change communication, and social mobilisation. It is therefore required to build the  
47 capacity of key contributors to verify, filter, and curate health information and use diverse communication  
48 channels to target public audiences (41). Community-based organisations, patient advocacy groups,  
49 professional associations, and non-governmental organisations with reputable brands, organisational  
50 resources, and a network of relationships can be leveraged to improve health risk communications.  
51 Existing evidence demonstrates that by partnering with local public health experts and policymakers to  
52 create information hubs and community outreach programs (42), these groups can significantly improve  
53 their ability to serve the information needs and concerns of diverse communities while also advocating  
54 for policy solutions. Existing evidence demonstrates that involving community members as planners, and  
55 attendees in pre-crisis planning activities, leads to increased preparedness and response activities.  
56 Therefore training in roles and responsibilities, relationship building, and team-building are required  
57  
58  
59  
60

1  
2  
3 strategies to facilitate and strengthen the contribution of community-based organisations, expert  
4 associations, and other relevant partners during epidemics and health emergencies (43).  
5  
6

### 7 **Community engagement**

8 Effective RCIM depends on engaging with communities to share information and to understand their  
9 unique concerns, experiences, wisdom, available resources, and preferred forms of communication, as  
10 well as to earn the support of community leaders as key intermediaries in response. These measures can  
11 maximise community collaboration and receptivity to ensuing recommendations. Given the social,  
12 contextual, economic, and geographical diversity that exists within countries, customised, community-  
13 based approaches essential for RCIM and health emergency response. Ethnographic and  
14 anthropological/social research on epidemics and health emergencies in the country could also help to  
15 improve understanding of the acceptability of response to emergencies and public health interventions.  
16 According to our interviews and expert panel discussion, the community was considered a missing piece  
17 in RCIM strategies in Iran. Information needs and concerns (e.g., disabilities, gender, age, literacy,  
18 cultural/ethnic backgrounds, access to technology) of the general Iranian population remained  
19 unexplored. In addition, the participatory engagement of citizens in a collective response to the COVID-  
20 19 infodemic was not only insufficient, but rather, at times, it was discouraged.  
21  
22  
23  
24  
25

26 During the COVID-19 pandemic, national health authorities and governments in most countries  
27 predominantly demonstrated top-down communication strategies (44). Effective RCIM requires a whole-  
28 of-society effort to sustain a healthy information ecosystem. Understanding the needs and concerns of  
29 vulnerable groups who might experience barriers to accessing accurate health information, care, and  
30 support, or be at higher risk of exposure and secondary impacts, such as children and adults with  
31 disabilities, is critically important(44). Effective risk communication can save lives during epidemics and  
32 health emergencies; however, existing evidence revealed that inadequate risk communication resulted  
33 in high exposure and loss of lives, as seen in Iran and Italy in the first wave (44, 45). Training and advising  
34 the general population on how to consume and share health information responsibly may be an effective  
35 strategy to improve the engagement and participation of public communities in risk communication and  
36 infodemic management. Investing in the community's media literacy, health literacy, and critical thinking  
37 skills before the crisis can prepare society to mitigate the physical and emotional consequences of false  
38 news and disinformation and increase resilience (46). As disinformation and infodemic during epidemics  
39 and health emergencies undermine trust, amplify fears, and consequently affect countries' responses to  
40 the global pandemic, tailored strategies to build and maintain trust among the public community are of  
41 utmost importance. Therefore, to be effective and foster public trust in government, any activities  
42 conducted in health risk communication and infodemic management must be guided by the principles of  
43 transparency, integrity, accountability, and community participation.  
44  
45  
46  
47  
48  
49  
50

### 51 **Limitations**

52 We address some limitations of the study. First, given that our study and the novel conceptual framework  
53 presented here are the first to address comprehensively the RCIM needs of, and strategies for, the Iranian  
54 health system context, further research and validation of its completeness and reliability, particularly  
55 after attempts to implement it, would be useful. Similarly, investigating causality and replicating the study  
56 with identical results can be challenging with qualitative studies of complex phenomena. However,  
57 involving diverse sets of respondents with experience and expertise in leading RCIM in two phases of  
58 research before reaching total consensus heightens the potential for the framework to be considered  
59  
60

1  
2  
3 credible and effective in being applied in the Iranian context. Further research could focus on applying  
4 best practices in RCIM, ecosystem mapping and analysis, and strengthening data collection and analysis  
5 for monitoring, evaluation, and learning. Investigating specific methods for evaluating RCIM activities are  
6 also important and critically recommended. Second, by focusing on the Iranian context, the  
7 transformability of the framework to other contexts remains yet untested. However, the high-level results  
8 echo leading international research on effective pandemic response and even if regional customisation  
9 would be beneficial, the current framework could potentially represent a well-informed basis for  
10 discussion, for further research, and for the creation of local versions.  
11  
12  
13

### 14 **Conclusion**

15 This study was inspired by an appreciation for the extent to which the COVID-19 infodemic is reported to  
16 have impacted the spread and burden of the disease globally, and of the role that an effective risk  
17 communication and information management (RCIM) strategy can play in mitigating the impact of  
18 infodemics. The purpose of this research was to support increased RCIM capacity in Iran and beyond  
19 through the creation of a unique conceptual model of evidence-, expert-, and experience-informed  
20 strategies for RCIM during epidemics and health emergencies. Our findings suggest that ineffective RCIM  
21 impeded the emergency response in Iran's COVID-19 management, which is partly attributable to Iran's  
22 government and national public health authorities failing to infuse an evidence-informed and strategic  
23 RCIM into policy- and decision-making. Consequently, access to high-quality and real-time information  
24 was extensively restricted and not publicly available, and the provincial public health settings failed to  
25 establish effective community relationships with experts, researchers, professional councils, and NGOs to  
26 facilitate knowledge translation and utilisation. Further, the extensive use of social media platforms and  
27 mass media worsened the circulation of rumours, fake news, and disinformation and led to public  
28 distrust. The lessons learned from the outbreak management and response in Iran suggest that RCIM  
29 should be an essential component of health emergency readiness and response activities. This begins  
30 with trustworthy leaders at all levels who have integrity and make credible, transparent decisions, and  
31 hold themselves accountable for outcomes. A national RCIM program should be established to support  
32 the required infrastructures, personnel, and processes to address communication challenges during  
33 epidemics and health emergencies. This should be based on a conceptual model of RCIM to illustrate a  
34 collaborative and interdependent context of risk communication activities, implying that any  
35 improvements in these areas requires an integrated and holistic approach. The government, private  
36 sector and pharmaceutical industries, experts, and the public should be involved in time, contributing  
37 diverse views and fulfilling respective responsibilities. The conceptual model presented here has the  
38 potential to be either implemented or serve as the foundation for the creation of a similar model in other  
39 contexts. Sharing experiences, challenges, and leading practices among jurisdictions can further improve  
40 the reliability and credibility of guidance and strategies.  
41  
42  
43  
44  
45  
46  
47  
48  
49

### 50 **Ethics approval and consent to participate**

51 This study was approved by the Research Ethics Committee of the Kerman University of Medical Sciences  
52 (IR.KMU.REC.1400.379). The Declaration of Helsinki was followed and informed consent was obtained  
53 from participants before starting the data collection stage.  
54  
55  
56  
57  
58  
59  
60

### Availability of data and materials

The datasets used and/or analysed during the current study are available from the corresponding author upon reasonable request.

### Competing interests

All authors declared that they had no competing interests.

### Funding

This study was financially supported by World Health Organization-Regional Office for the Eastern Mediterranean (WHO-EMR) Call for Proposals for Special Grant for COVID-19 Research, 2022 (**WHO Reference: 2022/1291032-0**)

### Authors' contributions

AB contributed to the project concept and manuscript design, qualitative data collection and interpretation, critical review of the manuscript writing, and discussion of the manuscript. AS worked on data analysis, data interpretation, and writing of the manuscript. MSB worked on data analysis, data interpretation, and writing of the manuscript. HM worked on literature search, data interpretation, and writing of the manuscript. MS worked on data analysis, data interpretation, and writing of the manuscript. JMG worked on data analysis, data interpretation, and writing and revising of the manuscript. HS worked on the project concept and manuscript design, supervising, critically review of the manuscript writing, and discussion the manuscript. All authors read and approved the final manuscript.

### Patient or public involvement

No patients or members of the public were involved in the present study.

### Acknowledgments

The authors wish to thank the provincial and national public health professionals who contributed to this study, the WHO for their funding support, and the *BMJ Open* editor and peer reviewers for their valuable insights.

### References

1. Muñoz-Sastre D, Rodrigo-Martín L, Rodrigo-Martín I. The Role of Twitter in the WHO's Fight against the Infodemic. *International Journal of Environmental Research and Public Health*. 2021;18(22):11990.
2. Mheidly N, Fares J. Leveraging media and health communication strategies to overcome the COVID-19 infodemic. *Journal of public health policy*. 2020;41(4):410-20.
3. The Lancet Infectious D. The COVID-19 infodemic. *The Lancet Infectious diseases*. 2020;20(8):875-.
4. Health Topics: Infodemic [Internet]. Available from: [https://www.who.int/health-topics/infodemic#tab=tab\\_1](https://www.who.int/health-topics/infodemic#tab=tab_1).
5. Yang K-C, Pierri F, Hui P-M, Axelrod D, Torres-Lugo C, Bryden J, et al. The covid-19 infodemic: Twitter versus facebook. *Big Data & Society*. 2021;8(1):20539517211013861.
6. Patel MP, Kute VB, Agarwal SK, Nephrology C-WGoISo. "Infodemic" COVID 19: More Pandemic than the Virus. *Indian journal of nephrology*. 2020;30(3):188-91.



- 1
- 2
- 3
- 4 7. Maharlouei N, Hosseinpour P, Erfani A, Shahriarirad R, Raeisi Shahrakie H, Rezaianzadeh A, et al.
- 5 Factors associated with reluctance to acquire COVID-19 vaccination: A cross-sectional study in Shiraz,
- 6 Iran, 2022. *Plos one*. 2022;17(12):e0278967.
- 7 8. Charkazi A, Allah Kalteh E, Yatimparvar G, Rahimzadeh H, Koochaki G, Shahini N, et al.
- 8 Prevalence of COVID-19 Vaccination Hesitancy and its Associated Factors based on the Health Belief
- 9 Model among Iranian People in 2021. *Health Education Health Promotion*. 2022;10(4):679-85.
- 10 9. Mirzaie A, Halaji M, Dehkordi FS, Ranjbar R, Noorbazargan H. A narrative literature review on
- 11 traditional medicine options for treatment of corona virus disease 2019 (COVID-19). *Complementary*
- 12 *therapies in clinical practice*. 2020;40:101214.
- 13 10. Khaniki H, Rasi Tehrani H. Theorizing for Covid 19 infodemic in Iran social media. *Quarterly of*
- 14 *Social Studies Research in Iran*. 2022:933-50.
- 15 11. Vinck P, Pham PN, Bindu KK, Bedford J, Nilles EJ. Institutional trust and misinformation in the
- 16 response to the 2018–19 Ebola outbreak in North Kivu, DR Congo: a population-based survey. *The*
- 17 *Lancet Infectious Diseases*. 2019;19(5):529-36.
- 18 12. Sørensen K, Pelikan JM, Röthlin F, Ganahl K, Slonska Z, Doyle G, et al. Health literacy in Europe:
- 19 comparative results of the European health literacy survey (HLS-EU). *European journal of public health*.
- 20 2015;25(6):1053-8.
- 21 13. Lorini C, Ierardi F, Bachini L, Donzellini M, Gemmi F, Bonaccorsi G. The antecedents and
- 22 consequences of health literacy in an ecological perspective: results from an experimental analysis.
- 23 *International journal of environmental research and public health*. 2018;15(4):798.
- 24 14. Carr-Hill R, Currie E. What explains the distribution of doctors and nurses in different countries,
- 25 and does it matter for health outcomes? *Journal of Advanced Nursing*. 2013;69(11):2525-37.
- 26 15. Zar HJ, Dawa J, Fischer GB, Castro-Rodriguez JA. Challenges of COVID-19 in children in low-and
- 27 middle-income countries. *Paediatric respiratory reviews*. 2020;35:70-4.
- 28 16. Geldsetzer P. Knowledge and perceptions of COVID-19 among the general public in the United
- 29 States and the United Kingdom: a cross-sectional online survey. *Annals of internal medicine*.
- 30 2020;173(2):157-60.
- 31 17. Islam MS, Sarkar T, Khan SH, Kamal A-HM, Hasan SM, Kabir A, et al. COVID-19–related infodemic
- 32 and its impact on public health: A global social media analysis. *The American journal of tropical*
- 33 *medicine and hygiene*. 2020;103(4):1621.
- 34 18. Kim HK, Ahn J, Atkinson L, Kahlor LA. Effects of COVID-19 misinformation on information
- 35 seeking, avoidance, and processing: A multicountry comparative study. *Science Communication*.
- 36 2020;42(5):586-615.
- 37 19. Lockyer B, Islam S, Rahman A, Dickerson J, Pickett K, Sheldon T, et al. Understanding COVID-19
- 38 misinformation and vaccine hesitancy in context: Findings from a qualitative study involving citizens in
- 39 Bradford, UK. *Health Expectations*. 2021;24(4):1158-67.
- 40 20. Mirhashemi SMH. Infodemic in the countries around the world after corona virus outbreak;
- 41 Necessity of Media literacy and information literacy improvement for citizens. *Applied Politics*.
- 42 2022;3(1):239-50.
- 43 21. World Health Organization. Infodemic management: an overview of infodemic management
- 44 during COVID-19, January 2020–May 2021. 2021.
- 45 22. Tangcharoensathien V, Calleja N, Nguyen T, Purnat T, D’Agostino M, Garcia-Saiso S, et al.
- 46 Framework for managing the COVID-19 infodemic: methods and results of an online, crowdsourced
- 47 WHO technical consultation. *Journal of medical Internet research*. 2020;22(6):e19659.
- 48 23. Lohiniva A-L, Nurzhynska A, Hudi A-h, Anim B. Infodemic Management Using Digital Information
- 49 and Knowledge Cocreation to Address COVID-19 Vaccine Hesitancy: Case Study From Ghana. *JMIR*
- 50 *infodemiology*. 2022;2(2):e37134.
- 51 24. Naeem SB, Bhatti R. The Covid-19 ‘infodemic’: a new front for information professionals. *Health*
- 52 *Information & Libraries Journal*. 2020;37(3):233-9.
- 53 25. Eysenbach G. How to fight an infodemic: the four pillars of infodemic management. *Journal of*
- 54 *medical Internet research*. 2020;22(6):e21820.
- 55
- 56
- 57
- 58
- 59
- 60

1  
2  
3  
4  
5  
6  
7  
8  
9  
10  
11  
12  
13  
14  
15  
16  
17  
18  
19  
20  
21  
22  
23  
24  
25  
26  
27  
28  
29  
30  
31  
32  
33  
34  
35  
36  
37  
38  
39  
40  
41  
42  
43  
44  
45  
46  
47  
48  
49  
50  
51  
52  
53  
54  
55  
56  
57  
58  
59  
60

26. Radu R. <? covid19?> Fighting the ‘Infodemic’: Legal Responses to COVID-19 Disinformation. *Social Media+ Society*. 2020;6(3):2056305120948190.
27. Hua J, Shaw R. Corona virus (Covid-19)“infodemic” and emerging issues through a data lens: The case of china. *International journal of environmental research and public health*. 2020;17(7):2309.
28. Organization WH. Everybody’s business: strengthening health systems to improve health outcomes: WHO’s framework for action. Geneva: WHO; 2007. 2018.
29. Bradley EH. Intersectoral collaboration: what works and what doesn’t. *International Journal of Health Policy Management*. 2023.
30. Hiller M, Bracht H, Schroeder S. One year with the COVID-19 pandemic– Lessons learnt? Intersectoral collaboration measures established during the crisis could benefit capacity and patient flow management in daily clinical practice. *Journal of Health Organization Management*. 2022;36(2):141-8.
31. White D. Application of systems thinking to risk management:: a review of the literature. *Management Decision*. 1995.
32. Olson CM. Consensus statements: applying structure. *JAMA*. 1995;273(1):72-3.
33. Geerts JM, Kinnair D, Taheri P, Abraham A, Ahn J, Atun R, et al. Guidance for health care leaders during the recovery stage of the COVID-19 pandemic: a consensus statement. *JAMA network open*. 2021;4(7):e2120295-e.
34. Dossett LA, Kaji AH, Cochran A. SRQR and COREQ reporting guidelines for qualitative studies. *JAMA surgery*. 2021;156(9):875-6.
35. Braun V, Clarke V. Using thematic analysis in psychology. *Qualitative research in psychology*. 2006;3(2):77-101.
36. Press TA. WHO chief warns world leaders against “politicizing” pandemic. *CBC News*. 2020.
37. Ofrin R, Buddha N, Htike M, Bhola A, Bezbaruah S. Strengthening risk communication systems for public health emergencies in the WHO South-East Asia Region. *WHO South-East Asia Journal of Public Health*. 2020;9(1):15-20.
38. Eldman. Eldman Trust Baromter 2020 2020 [Available from: [https://www.edelman.com/sites/g/files/aatuss191/files/2020-03/2020%20Edelman%20Trust%20Barometer%20Coronavirus%20Special%20Report\\_0.pdf](https://www.edelman.com/sites/g/files/aatuss191/files/2020-03/2020%20Edelman%20Trust%20Barometer%20Coronavirus%20Special%20Report_0.pdf).
39. Brennen JS, Simon FM, Howard PN, Nielsen RK. Types, sources, and claims of COVID-19 misinformation: University of Oxford; 2020.
40. Neavel C, Watkins SC, Chavez M. Youth, social media, and telehealth: How COVID-19 changed our interactions. *Pediatric Annals*. 2022;51(4):e161-e6.
41. Goulbourne T, Yanovitzky I. The communication infrastructure as a social determinant of health: implications for health Policymaking and practice. *The Milbank Quarterly*. 2021;99(1):24.
42. Hering JG. Do we need “more research” or better implementation through knowledge brokering? *Sustainability Science*. 2016;11(2):363-9.
43. World Health Organization. Communicating risk in public health emergencies: a WHO guideline for emergency risk communication (ERC) policy and practice: World Health Organization; 2017.
44. Khan S, Mishra J, Ahmed N, Onyige CD, Lin KE, Siew R, et al. Risk communication and community engagement during COVID-19. *International Journal of Disaster Risk Reduction*. 2022;74:102903.
45. Chakrabarti A. Confusion in Italy, clarity in Singapore — how govts are communicating during coronavirus 2020 [cited 2022 26/11]. Available from: <https://theprint.in/world/confusion-in-italy-clarity-in-singapore-how-govts-are-communicating-during-coronavirus/378932/>.
46. Xie L, Pinto J, Zhong B. Building community resilience on social media to help recover from the COVID-19 pandemic. *Computers in Human Behavior*. 2022;134:107294.



| <br><b>Leadership &amp; governance</b>                                                                                                                                                                                                                                                                                                                                                                                                                                                                                                                                                                                                                                                              | <br><b>Information</b>                                                                                                                                                                                                                                                                                                                                                                                                                                                                                                                                | <br><b>Health workforce</b>                                                                                                                                                                                                                                                                                                                                      | <br><b>Financing</b>  | <br><b>Media</b>                                                                                                                                                                                                                                                                                                                                                                                                                                                                                        | <br><b>Community</b>                                                                                                                                                                                                                                                                                                                                                                                                                                                                                          |
|--------------------------------------------------------------------------------------------------------------------------------------------------------------------------------------------------------------------------------------------------------------------------------------------------------------------------------------------------------------------------------------------------------------------------------------------------------------------------------------------------------------------------------------------------------------------------------------------------------------------------------------------------------------------------------------------------------------------------------------------------------------------------------------|----------------------------------------------------------------------------------------------------------------------------------------------------------------------------------------------------------------------------------------------------------------------------------------------------------------------------------------------------------------------------------------------------------------------------------------------------------------------------------------------------------------------------------------------------------------------------------------------------------------------------------------|---------------------------------------------------------------------------------------------------------------------------------------------------------------------------------------------------------------------------------------------------------------------------------------------------------------------------------------------------------------------------------------------------------------------------------------------------|--------------------------------------------------------------------------------------------------------|------------------------------------------------------------------------------------------------------------------------------------------------------------------------------------------------------------------------------------------------------------------------------------------------------------------------------------------------------------------------------------------------------------------------------------------------------------------------------------------------------------------------------------------------------------------------------------------|--------------------------------------------------------------------------------------------------------------------------------------------------------------------------------------------------------------------------------------------------------------------------------------------------------------------------------------------------------------------------------------------------------------------------------------------------------------------------------------------------------------------------------------------------------------------------------------------------|
| <p><b>Structure</b><br/>Clearly defined personnel, roles, protocols, supports, and accountabilities</p> <p><b>Ethics</b><br/>Integrity, equity, transparency, and accountability</p> <p><b>System capacity</b><br/>Develop infrastructures for monitoring, social listening, communicating, and distilling the best available information and recommendations</p> <p><b>Operationalisation</b><br/>Develop, implement, and evaluate communication policies and strategies for potential risks</p> <p><b>Engagement</b><br/>Create population, multisector, and community involvement for risk communication</p> <p><b>Institutional/provincial design</b><br/>Polycentric governance to share information and inform and guide local responses, including by using crowdsourcing</p> | <p><b>Platform</b><br/>Develop a networked platform for real-time and reliable data collection, including from international sources</p> <p><b>Surveillance</b><br/>Use the information to investigate, prepare, and effectively respond to challenges</p> <p><b>Policy making</b><br/>Use of surveillance data for evidence-based decision-making and recommendations</p> <p><b>Evaluation and adaptation</b><br/>Regular monitoring and analysis of the system for continuous quality and reliability of data sources</p> <p><b>Knowledge sharing</b><br/>Develop, implement, support, and facilitate accurate knowledge sharing</p> | <p><b>Diversity and flexibility</b><br/>Prepare diverse specialists in all parts of the system with the various skills needed to respond effectively to evolving challenges</p> <p><b>Limited resources</b><br/>Prepare an adequate number of professionals, despite scarce resources</p> <p><b>Community involvement</b><br/>Resource capacity beyond health professionals, such as scientists and experts, professional councils, and NGOs.</p> | <p><b>Resource allocation</b><br/>Ensure there is adequate financing and use resources effectively</p> | <p><b>Mass Media</b><br/>Develop communication channels through Television, radio, and newspapers</p> <p><b>Government and health authorities' websites</b><br/>Develop validated sources of information with high accessibility and timeliness</p> <p><b>Social media platforms</b><br/>Use social media to increase access to credible information and recommendations and to combat misinformation</p> <p><b>Source Credibility</b><br/>Build and maintain trust in formal sources</p> <p><b>Formal spokespersons</b><br/>Identify and prepare credible and qualified individuals</p> | <p><b>Diversity</b><br/>Customise responses based on the diverse needs of communities with different cultures, ethnicity, and geographies</p> <p><b>Engagement</b><br/>Involve, consult, inform, engage, and collaborate with diverse communities and leaders</p> <p><b>Resilience</b><br/>Improve health, media, and digital literacy, and provide evidence-based tools</p> <p><b>Empowerment</b><br/>Enable communities to develop their own solutions and identify local influencers</p> <p><b>Trust</b><br/>Build and maintain trust to maximise social cohesion and successful response</p> |

Figure 1

668x471mm (38 x 38 DPI)

1  
2  
3  
4  
5  
6  
7  
8  
9  
10  
11  
12  
13  
14  
15  
16  
17  
18  
19  
20  
21  
22  
23  
24  
25  
26  
27  
28  
29  
30  
31  
32  
33  
34  
35  
36  
37  
38  
39  
40  
41  
42  
43  
44  
45  
46  
47  
48  
49  
50  
51  
52  
53  
54  
55  
56  
57  
58  
59  
60



Figure 2

235x136mm (108 x 108 DPI)

## Interview guide

### Part I: Demographic information

Age .....

Gender Female / Male

Educational level .....

Academic discipline .....

What organizational position were you involved in at the time of the Covid 19 epidemic? .....

### Part II: Perceptions, experiences, future directions

The main purpose of the questions in this section is to identify effective strategies and successful experiences in the field of infodemic management related to Covid 19 in Kerman province. Please answer the following questions based on your experiences or field observations.

- 1- The spread of misleading, inaccurate, and fake information about COVID-19 disease and vaccination has been one of the consequences of the COVID-19 epidemic, which affects the behavior of society and trust in the health system. What experience did you have in managing misinformation? What did you do in a situation in the province where accurate information was not yet available? Can you explain your own experiences in this field?
- 2- 2. What challenges and obstacles did you face in combating inaccurate information and infodemic management?
- 3- What did you do in response to the obstacles and challenges?
- 4- How did you find out about the effectiveness of your interventions and actions?
- 5- 5- If the pandemic situation is repeated, what is your approach to managing infodemic?

## Informed Consent

Hi,

My name is Azam Bazrafshan. My colleague and I are from the Kerman University of Medical Sciences. We interview executives, technical experts, decision-makers, and leaders of public health initiatives who had participated in the provincial, or national COVID-19 prevention and control programs to use the results to improve health interventions during epidemics, pandemics, and global health crises. We are intended to investigate processes, infrastructure, strategies, successful experiences and challenges in the field of infodemic management related to Covid 19 in Kerman province. You are being invited to take part in this research because we feel that your experience as a public health leader can contribute much to our understanding and knowledge of processes and infrastructure of infodemic management during health epidemics.

Your participation in this research is entirely voluntary. It is your choice whether to participate or not. If you choose not to participate all the services you receive at this Centre will continue and nothing will change.

In this interview, I will not ask your name, nor will I need your address. All your answers will be completely confidential. We only use the total responses for statistical survey. During this interview, private questions may also be asked and I have to emphasize that although your honest cooperation is valuable, you can answer any question you think appropriate. The estimated time of interview is about 30 minutes and the interview is recorded by tape recorder.

You do not have to take part in this research if you do not wish to do so, and choosing to participate will not affect your job or job-related evaluations in any way. You may stop participating in the interview at any time that you wish without your job being affected. I will give you an opportunity at the end of the interview to review your remarks, and you can ask to modify or remove portions of those, if you do not agree with my notes or if I did not understand you correctly.

**I have read the foregoing information, or it has been read to me. I have had the opportunity to ask questions about it and any questions I have been asked have been answered to my satisfaction. I consent voluntarily to be a participant in this study**

**Signature of Participant** \_\_\_\_\_

**Date** \_\_\_\_\_ **Day/month/year**

Signature

Appendix 3. Themes and subthemes related to the challenges and successful activities of infodemic management across provincial/national public health settings in Iran

| Theme                              | Sub-theme               | Sample Quotes                                                                                                                                                                                                                                                                                                                                                        |
|------------------------------------|-------------------------|----------------------------------------------------------------------------------------------------------------------------------------------------------------------------------------------------------------------------------------------------------------------------------------------------------------------------------------------------------------------|
| <b>Leadership &amp; governance</b> |                         |                                                                                                                                                                                                                                                                                                                                                                      |
| Ethics                             | Transparency            | When I report falsely on the radio, people would understand. If I have this transparency at the national and university level, people will gain their trust, but this strategy does not exist, it certainly does not exist, neither at the national level, nor at the university or provincial level. (Man, 47 years old)                                            |
|                                    |                         | There is a level of transparency that the government should have, the officials should have, I would say that it is extremely small considering the structure of our country. (Man, 42 years old)                                                                                                                                                                    |
|                                    | Accountability          | No one was responsible, a disaster happened, I learned by myself, it was unknown to us, we could have managed this if the ministry had interfered less, the ministry acted badly and this bad behavior spread everywhere.(Man, 55 years old)                                                                                                                         |
|                                    | Conflicts of interests  | Conflict of interests is one of the most important challenges in the Ministry of Health, which hinders transparency. Profit seeking of companies that produce personal protective equipment, diagnostic and therapeutic equipment, and vaccines, is One of the most important examples of conflicts of interests during the pandemic management. (Man, 70 years old) |
| Capacity                           | Infrastructures         | We need a quick reaction team that is in contact with academic centers, regularly monitors and examines community's needs and concerns. (Man, 49 years old)                                                                                                                                                                                                          |
|                                    |                         | ... and can quickly identify rumours and false information and design an answer to them. (Man, 42 years old)                                                                                                                                                                                                                                                         |
|                                    |                         | A multi-disciplinary risk communication team should be formed to be responsible for informing and making decisions. (Man, 58 years old)                                                                                                                                                                                                                              |
|                                    | Rules & regulations     | During the pandemic, there were people who published false and contradictory information, and there was no authority to deal with this issue and deal with them judicially, while in many countries, when the issue of people's health is discussed, false information is not allowed to be published. (Man, 70 years old)                                           |
|                                    | Policies and strategies | There is no specific strategy and program to deal with infodemic and manage risk communication in the country. (Man, 70 years old)                                                                                                                                                                                                                                   |
|                                    | Role definition         | The duties and responsibilities of people in crisis situations should be clear so that everyone does not act and speak as they wish... The goals of the programs should be clear and the responsibilities of each member of the committees should be clearly stated. (Man, 53 years old)                                                                             |
| Operational isation                | Timeliness              | In order to prepare in crisis conditions, it is necessary to make necessary plans before every crisis. (Man, 45 years old)                                                                                                                                                                                                                                           |
|                                    | Coordination            | One of our most important problems was the lack of coordination between the government and the officials in the matter of information. There were several voices and no coordination between different sources in the health department. (Man, 58 years old)                                                                                                         |

|                                 |                                 |                                                                                                                                                                                                                                                                                                                                                                                                                                                                                                                                                                                                                                                 |
|---------------------------------|---------------------------------|-------------------------------------------------------------------------------------------------------------------------------------------------------------------------------------------------------------------------------------------------------------------------------------------------------------------------------------------------------------------------------------------------------------------------------------------------------------------------------------------------------------------------------------------------------------------------------------------------------------------------------------------------|
| Institutional/provincial design | Knowledge exchange              | In the discussion of pandemic management, the provinces were left to their own devices, and no province was aware of the activities of other provinces in the management of the infodemic. (Man, 55 years old)                                                                                                                                                                                                                                                                                                                                                                                                                                  |
| <b>Information</b>              |                                 |                                                                                                                                                                                                                                                                                                                                                                                                                                                                                                                                                                                                                                                 |
| <b>Theme</b>                    | <b>Sub-theme</b>                | <b>Sample quotes</b>                                                                                                                                                                                                                                                                                                                                                                                                                                                                                                                                                                                                                            |
| Surveillance                    | Timeliness                      | No real-time data were available about the mortality of COVID-19 cases. Even now, if we refer to the statistical systems, we will not get a correct and reliable information and coordination so that we can inform the community. (Man, 48 years old)<br><br>Unfortunately, many of the events that happened in the country have not been documented and, for example, we do not know how many patients were infected with Corona, how many died. Even the medical and nursing systems used to come and give general information. It showed that either they don't have this information or they don't want to publish it. (Man, 49 years old) |
|                                 | Data quality                    | No consensus data were available as mortality data reported by the hospitals, forensic systems, and cemeteries, were very contradictory. (Man, 48 years old)                                                                                                                                                                                                                                                                                                                                                                                                                                                                                    |
|                                 | Surveillance systems            | Surveillance data were extremely out of date, with low quality and consistency. (Man, 54 years old)<br><br>Our surveillance data were not accurate and real-time. (Man, 48 years old)<br><br>Therefore, it seems that we need a system that collects information from the environmental levels in a database in the form of software that has the power of analysis to give us alarms in different places. Its infrastructure in the country is planned as a syndromic care system, but I don't know if it has actually been implemented. (Man, 49 years old)                                                                                   |
| Knowledge translation           | Evidence-informed policy making | No evidence about the effectiveness of interventions were synthesised and published for decision making. (Man, 54 years old)<br><br>The next problem was that the correct information did not reach those who should manage infodemic, for example, the number of patients at any moment, the number of deaths, what was the cause of death. (Man, 52 years old)                                                                                                                                                                                                                                                                                |
|                                 | Knowledge translation Capacity  | Most of the statistics and information will be based on taste and subjective and this will cause individual perceptions and people will allow themselves to give any statistics. (Man, 48 years old)                                                                                                                                                                                                                                                                                                                                                                                                                                            |
| <b>Health workforce</b>         |                                 |                                                                                                                                                                                                                                                                                                                                                                                                                                                                                                                                                                                                                                                 |
| <b>Theme</b>                    | <b>Sub-theme</b>                | <b>Sample Quote</b>                                                                                                                                                                                                                                                                                                                                                                                                                                                                                                                                                                                                                             |
| Capacity building               | Diversity and flexibility       | That's why we have to find an entry in the educational fields and teach this issue seriously in the form of workshops for groups close to graduation or students in the form of refresher courses regularly and continuously. Let's define a retraining unit for it and implement it operationally, not just theoretically. (Man, 48 years old)                                                                                                                                                                                                                                                                                                 |
| Challenges                      | Limited resources               | One of our most important challenges in risk communication and infodemic management is the lack of trained and expert people in this field. (Man, 70 years old)                                                                                                                                                                                                                                                                                                                                                                                                                                                                                 |

|                            |                                           |                                                                                                                                                                                                                                                                                                                                                                                                                     |
|----------------------------|-------------------------------------------|---------------------------------------------------------------------------------------------------------------------------------------------------------------------------------------------------------------------------------------------------------------------------------------------------------------------------------------------------------------------------------------------------------------------|
| Engagement                 | Community involvement                     | The non-participation of experts from different scientific fields in the pandemic management and informing the people was a big challenge, which caused people who had good experience or knowledge to be ignored, and therefore, unqualified people were in charge of informing the people. (Man, 42 years old)                                                                                                    |
| <b>Financial resources</b> |                                           |                                                                                                                                                                                                                                                                                                                                                                                                                     |
| <b>Theme</b>               | <b>Sub-theme</b>                          | <b>Sample Quote</b>                                                                                                                                                                                                                                                                                                                                                                                                 |
| Government resources       | Planning                                  | Particular financial sources should be allocated to the risk communication activities. (Man, 66 years old)                                                                                                                                                                                                                                                                                                          |
| <b>Media</b>               |                                           |                                                                                                                                                                                                                                                                                                                                                                                                                     |
| <b>Theme</b>               | <b>Sub-theme</b>                          | <b>Sample Quote</b>                                                                                                                                                                                                                                                                                                                                                                                                 |
| Communication channels     | Mass media                                | National TV and Radio channels are still the biggest and most influential communication channels in Iran. (Man, 46 years old)                                                                                                                                                                                                                                                                                       |
|                            | Government & health authorities' websites | We used both video media such as radio and television, as well as written media such as magazines, newspapers, and government websites, which were very active during the Corona era, to communicate the data related to the incidence of the disease in the province and recommend preventive measures. (Man, 49 years old)                                                                                        |
|                            | Social media platforms                    | We have established a social media platform (Instagram) named Dr+ to communicate with people and held online discussion panels with contribution of clinical physicians to address the community's needs and concerns. (Man, 53 years old)                                                                                                                                                                          |
| Trust                      | Source credibility                        | Communication channels should be used that are highly credible and people trust to them. Some brand communication channels should be developed to maximize the impact and penetration of information among people. (Man, 47 years old)                                                                                                                                                                              |
| spokespersons              | Competence                                | For a person to be a spokesperson and to give information, to know how to give information, not to be too hopeful, not to speak too hopelessly, this is real information when we say not only to report numbers... For example, when the pandemic came, someone said that there is nothing, someone said Wow, we are unfortunate, which one of these people should accept when they look at it? (Man, 58 years old) |
| <b>Community</b>           |                                           |                                                                                                                                                                                                                                                                                                                                                                                                                     |
| <b>Theme</b>               | <b>Sub-theme</b>                          | <b>Example Strategies</b>                                                                                                                                                                                                                                                                                                                                                                                           |
| Diversity                  | Social context                            | The penetration rate of scientific issues in our society is low, which is related to various issues, so if we ever want to increase this penetration rate, we have to approach from different social and cultural aspects. (Man, 54 years old)                                                                                                                                                                      |
| Engagement & empowerment   | interventions                             | We have developed a community engagement facility to listen the community's needs and expectations and answer to their concerns and questions interactively. (Man, 55 years old)<br><br>Safir-e-Salamat was a group of trained volunteers who communicate health information with their families and their neighbourhood. (Man, 55 years old)                                                                       |



1  
2  
3  
4  
5  
6  
7  
8  
9  
10  
11  
12  
13  
14  
15  
16  
17  
18  
19  
20  
21  
22  
23  
24  
25  
26  
27  
28  
29  
30  
31  
32  
33  
34  
35  
36  
37  
38  
39  
40  
41  
42  
43  
44  
45  
46  
47  
48  
49  
50  
51  
52  
53  
54  
55  
56  
57  
58  
59  
60

|       |                                          |                                                                                                                                                                                                                                                                                                                                                                                                                                                             |
|-------|------------------------------------------|-------------------------------------------------------------------------------------------------------------------------------------------------------------------------------------------------------------------------------------------------------------------------------------------------------------------------------------------------------------------------------------------------------------------------------------------------------------|
| Trust | Trust to government and health officials | Public opinion has no trust in the government, especially in matters that are officially announced. (Man, 47 years old)<br><br>Anyone, any scientist, any distinguished person, any accepted person comes and says something, the first time people do not accept it, especially if it is actually what the government says or emphasizes, people will definitely look for the opposite and say that there is something fishy about it. (Man, 53 years old) |
|-------|------------------------------------------|-------------------------------------------------------------------------------------------------------------------------------------------------------------------------------------------------------------------------------------------------------------------------------------------------------------------------------------------------------------------------------------------------------------------------------------------------------------|

For peer review only

## Standards for reporting qualitative research (SRQR) checklist

| No                        | Topic                                      | Item                                                                                                                                                                                                                                                                                                                                             | Page number |
|---------------------------|--------------------------------------------|--------------------------------------------------------------------------------------------------------------------------------------------------------------------------------------------------------------------------------------------------------------------------------------------------------------------------------------------------|-------------|
| <b>Title and abstract</b> |                                            |                                                                                                                                                                                                                                                                                                                                                  |             |
| S1                        | Title                                      | Concise description of the nature and topic of the study Identifying the study as qualitative or indicating the approach (e.g., ethnography, grounded theory) or data collection methods (e.g., interview, focus group) is recommended                                                                                                           | 1           |
| S2                        | Abstract                                   | Summary of key elements of the study using the abstract format of the intended publication; typically includes background, purpose, methods, results, and conclusions                                                                                                                                                                            | 1           |
| <b>Introduction</b>       |                                            |                                                                                                                                                                                                                                                                                                                                                  |             |
| S3                        | Problem formulation                        | Description and significance of the problem/phenomenon studied; review of relevant theory and empirical work; problem statement                                                                                                                                                                                                                  | 2           |
| S4                        | Purpose or research question               | Purpose of the study and specific objectives or questions                                                                                                                                                                                                                                                                                        | 3           |
| <b>Methods</b>            |                                            |                                                                                                                                                                                                                                                                                                                                                  |             |
| S5                        | Qualitative approach and research paradigm | Qualitative approach (e.g., ethnography, grounded theory, case study, phenomenology, narrative research) and guiding theory if appropriate; identifying the research paradigm (e.g., postpositivist, constructivist/ interpretivist) is also recommended; rationale                                                                              | 4           |
| S6                        | Researcher characteristics and reflexivity | Researchers' characteristics that may influence the research, including personal attributes, qualifications/experience, relationship with participants, assumptions, and/or presuppositions; potential or actual interaction between researchers' characteristics and the research questions, approach, methods, results, and/or transferability | -           |
| S7                        | Context                                    | Setting/site and salient contextual factors; rationale                                                                                                                                                                                                                                                                                           | 4           |
| S8                        | Sampling strategy                          | How and why research participants, documents, or events were selected; criteria for deciding when no further sampling was necessary (e.g., sampling saturation); rationale                                                                                                                                                                       | 4           |

|                  |                                                                                              |                                                                                                                                                                                                                                                                                                       |                     |
|------------------|----------------------------------------------------------------------------------------------|-------------------------------------------------------------------------------------------------------------------------------------------------------------------------------------------------------------------------------------------------------------------------------------------------------|---------------------|
| S9               | Ethical issues pertaining to human subjects                                                  | Documentation of approval by an appropriate ethics review board and participant consent, or explanation for lack thereof; other confidentiality and data security issues                                                                                                                              | 4                   |
| S10              | Data collection methods                                                                      | Types of data collected; details of data collection procedures including (as appropriate) start and stop dates of data collection and analysis, iterative process, triangulation of sources/methods, and modification of procedures in response to evolving study findings; rationale                 | 4-5                 |
| S11              | Data collection instruments and technologies                                                 | Description of instruments (e.g., interview guides, questionnaires) and devices (e.g., audio recorders) used for data collection; if/how the instrument(s) changed over the course of the study                                                                                                       | 4-5                 |
| S12              | Units of study                                                                               | Number and relevant characteristics of participants, documents, or events included in the study; level of participation (could be reported in results)                                                                                                                                                | NA                  |
| S13              | Data processing                                                                              | Methods for processing data prior to and during analysis, including transcription, data entry, data management and security, verification of data integrity, data coding, and anonymization/deidentification of excerpts                                                                              | 4-5                 |
| S14              | Data analysis                                                                                | Process by which inferences, themes, etc., were identified and developed, including the researchers involved in data analysis; usually references a specific paradigm or approach; rationale                                                                                                          | 4-5                 |
| S15              | Techniques to enhance trustworthiness                                                        | Techniques to enhance trustworthiness and credibility of data analysis (e.g., member checking, audit trail, triangulation); rationale                                                                                                                                                                 | 5                   |
| Results/findings |                                                                                              |                                                                                                                                                                                                                                                                                                       |                     |
| S16              | Synthesis and interpretation                                                                 | Main findings (e.g., interpretations, inferences, and themes); might include development of a theory or model, or integration with prior research or theory                                                                                                                                           | 5                   |
| S17              | Links to empirical data                                                                      | Evidence (e.g., quotes, field notes, text excerpts, photographs) to substantiate analytic findings                                                                                                                                                                                                    | 6-<br>appendix<br>3 |
| Discussion       |                                                                                              |                                                                                                                                                                                                                                                                                                       |                     |
| S18              | Integration with prior work, implications, transferability, and contribution(s) to the field | Short summary of main findings; explanation of how findings and conclusions connect to, support, elaborate on, or challenge conclusions of earlier scholarship; discussion of scope of application/generalizability; identification of unique contribution(s) to scholarship in a discipline or field | 11                  |
| S19              | Limitations                                                                                  | Trustworthiness and limitations of findings                                                                                                                                                                                                                                                           | 13                  |
| Other            |                                                                                              |                                                                                                                                                                                                                                                                                                       |                     |

|     |                       |                                                                                                                |    |
|-----|-----------------------|----------------------------------------------------------------------------------------------------------------|----|
| S20 | Conflicts of interest | Potential sources of influence or perceived influence on study conduct and conclusions; how these were managed | 14 |
| S21 | Funding               | Sources of funding and other support; role of funders in data collection, interpretation, and reporting        | 15 |
|     |                       |                                                                                                                |    |

For peer review only
